# Supplementary material for: Clap-and-Fling Mechanism in Non-Zero Inflow of a Tailless Two-Winged Flapping-Wing Micro Air Vehicle
Source: MDPI journal article supplement (doi:10.3390/aerospace9020108), 2022-02-16

Figure S3: Flow fields in  $50\%c_m$ -plane during down-stroke reversal. For all values of  $J$ , the wing distance is 16 mm. The black curves are the intersections between the wings and the plane. The wing roots are marked with white circles.

Pressure  
Plane 1  
100  
72  
44  
16  
-12  
-40  
[Pa]

$J=0$

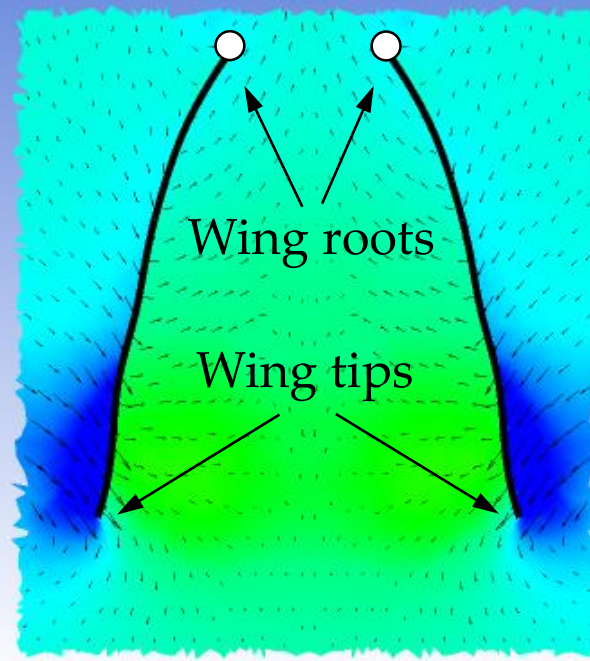

$t/T=0.21$

ANSYS  
R16.2  
Azimuthal

Pressure  
Plane 1  
100  
72  
44  
16  
-12  
-40  
[Pa]

$J=0.5$

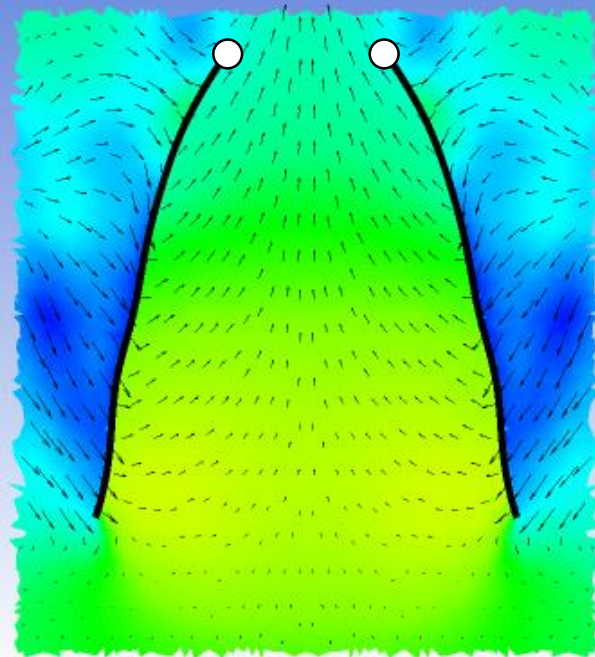

ANSYS  
R16.2  
Azimuthal

Pressure  
Plane 1  
100  
72  
44  
16  
-12  
-40  
[Pa]

$J=1$

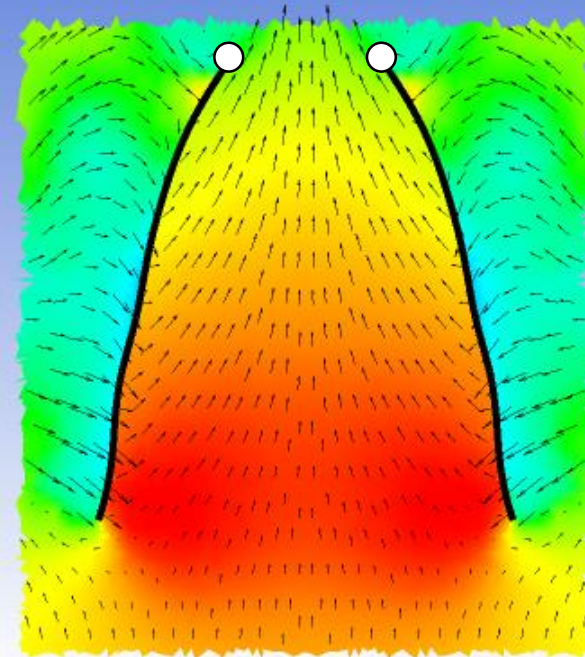

ANSYS  
R16.2  
Azimuthal

Pressure  
Plane 1  
100  
72  
44  
16  
-12  
-40  
[Pa]

$J=0$

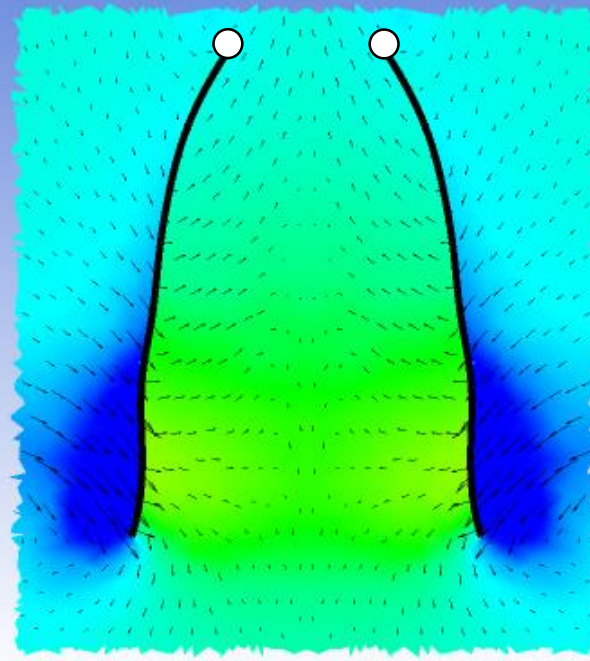

$t/T=0.22$

ANSYS  
R16.2  
Azimuthal

Pressure  
Plane 1  
100  
72  
44  
16  
-12  
-40  
[Pa]

$J=0.5$

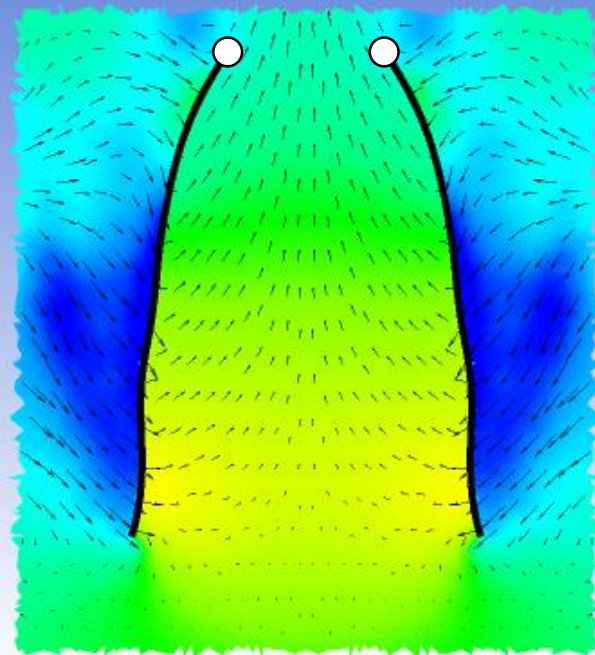

ANSYS  
R16.2  
Azimuthal

Pressure  
Plane 1  
100  
72  
44  
16  
-12  
-40  
[Pa]

$J=1$

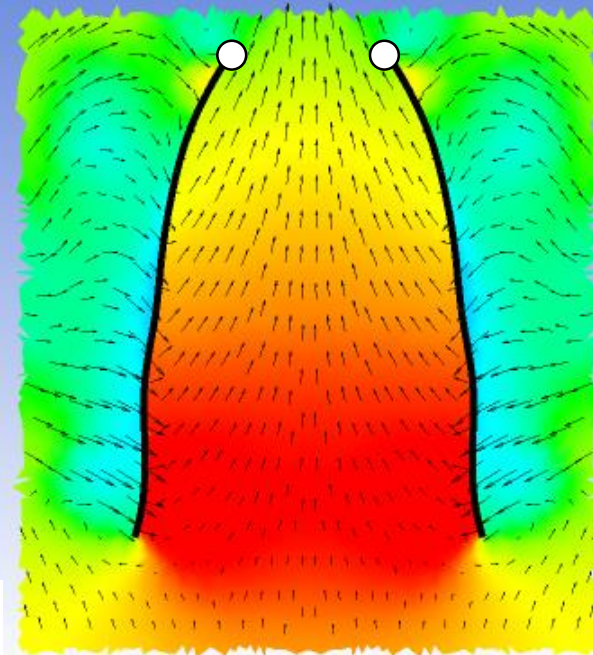



Pressure  
Plane 1  
100  
72  
44  
16  
-12  
-40  
[Pa]

$J=0$

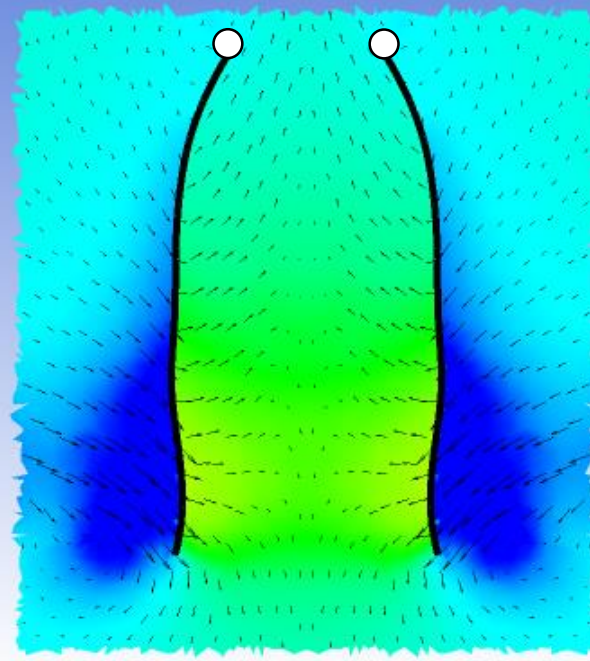

$t/T=0.23$

ANSYS  
R16.2  
Acoustic

Pressure  
Plane 1  
100  
72  
44  
16  
-12  
-40  
[Pa]

$J=0.5$

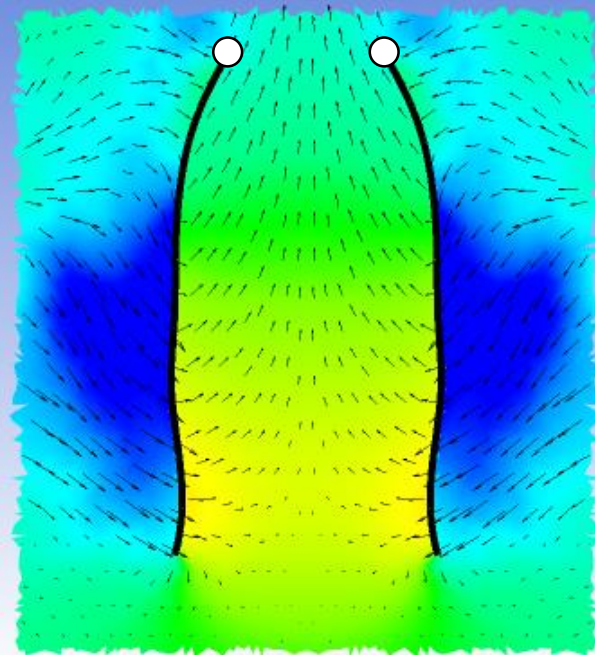

ANSYS  
R16.2  
Acoustic

Pressure  
Plane 1  
100  
72  
44  
16  
-12  
-40  
[Pa]

$J=1$

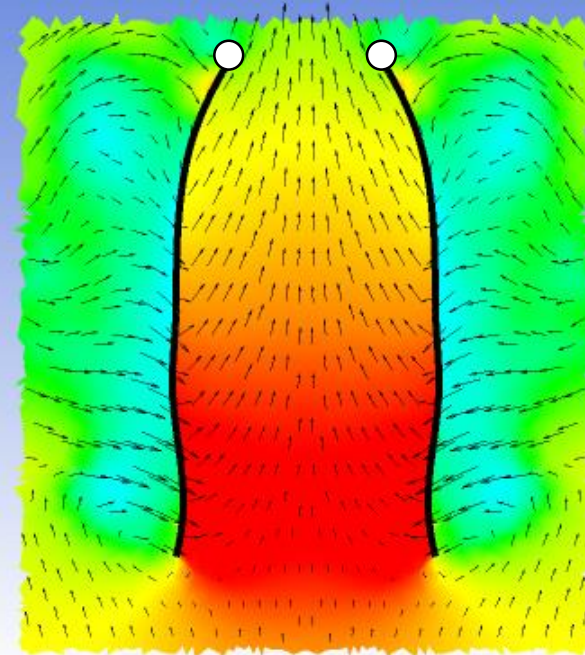

Pressure  
Plane 1  
100  
72  
44  
16  
-12  
-40  
[Pa]

$J=0$

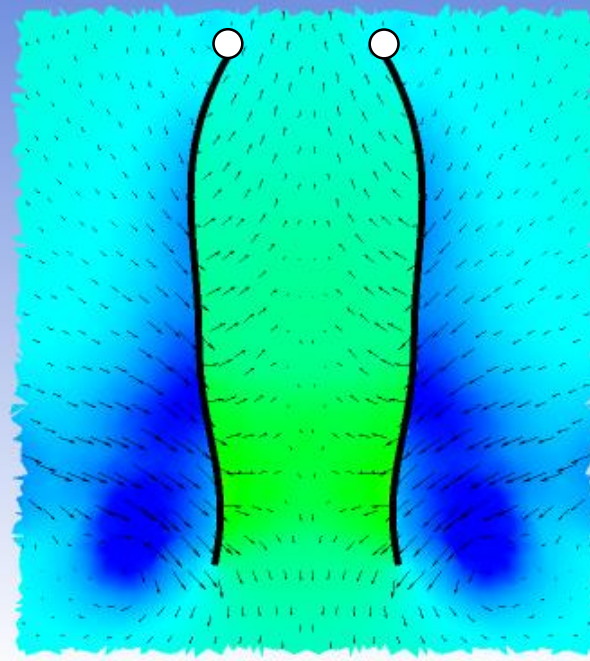

$t/T=0.24$

Pressure  
Plane 1  
100  
72  
44  
16  
-12  
-40  
[Pa]

$J=0.5$

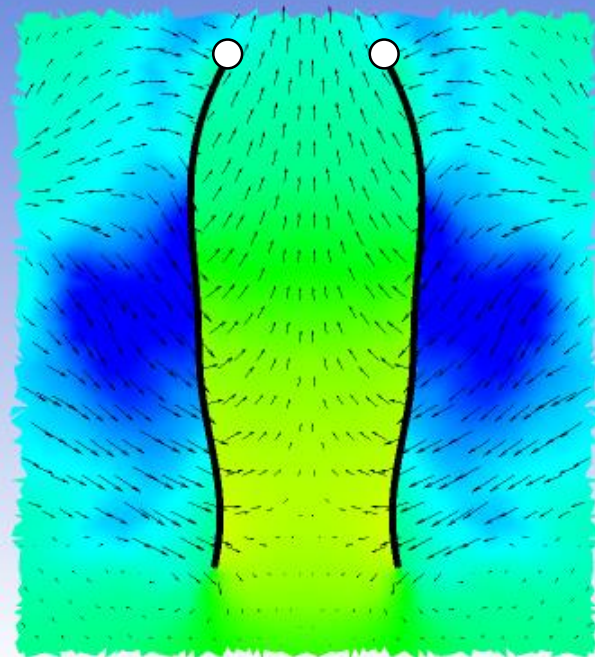

ANSYS  
R16.2  
Azimuthal

Pressure  
Plane 1  
100  
72  
44  
16  
-12  
-40  
[Pa]

$J=1$

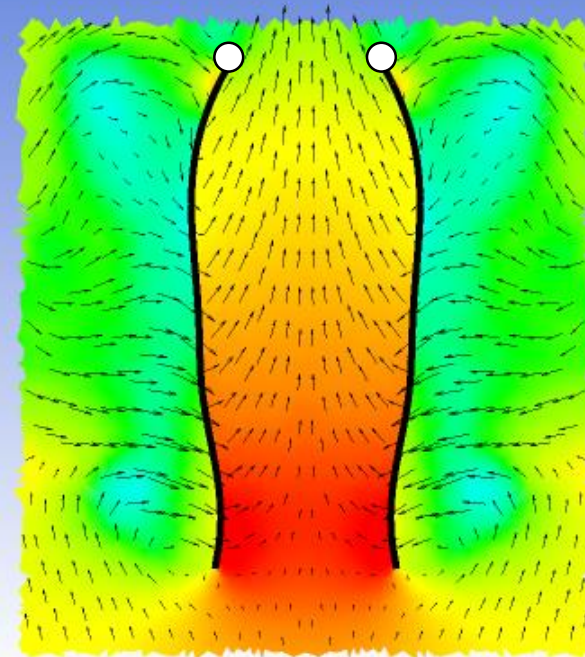



Pressure  
Plane 1  
100  
72  
44  
16  
-12  
-40  
[Pa]

$J=0$

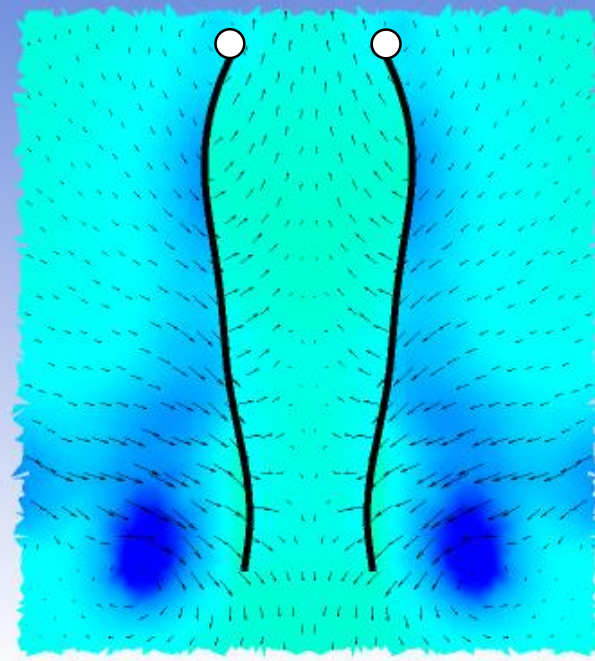

$t/T=0.25$

Pressure  
Plane 1  
100  
72  
44  
16  
-12  
-40  
[Pa]

$J=0.5$

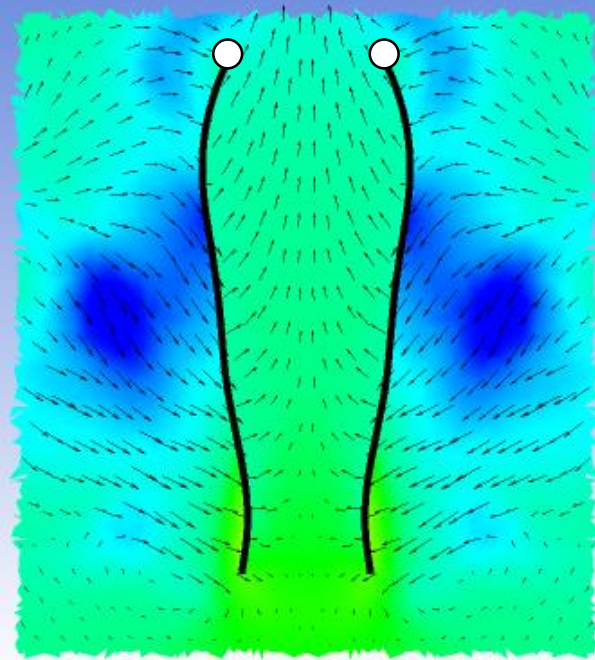

ANSYS  
R16.2  
Azimuthal

Pressure  
Plane 1  
100  
72  
44  
16  
-12  
-40  
[Pa]

$J=1$

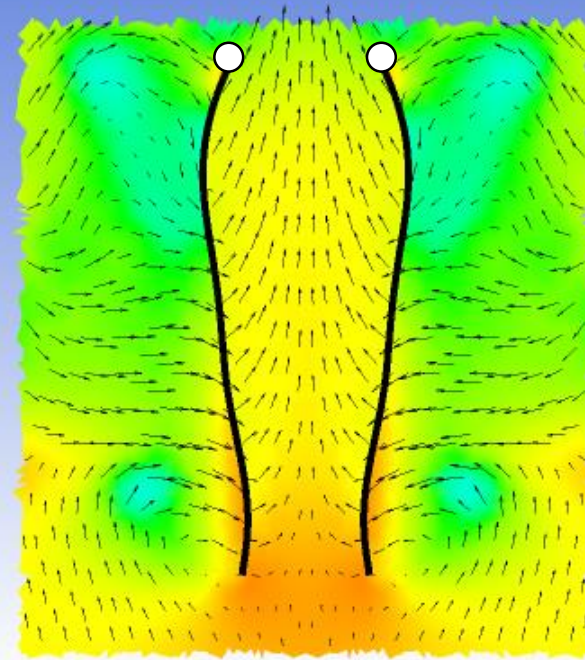

Pressure  
Plane 1  
100  
72  
44  
16  
-12  
-40  
[Pa]

$J=0$

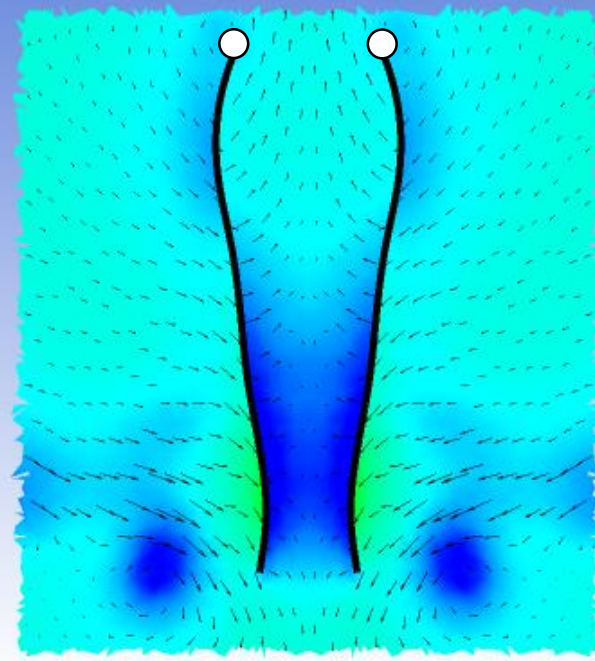

$t/T=0.26$

ANSYS  
R16.2  
Azimuthal

Pressure  
Plane 1  
100  
72  
44  
16  
-12  
-40  
[Pa]

$J=0.5$

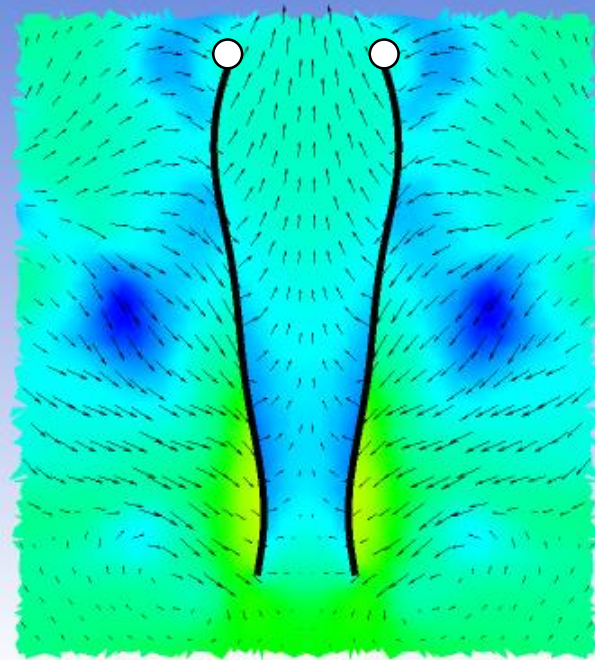

ANSYS  
R16.2  
Azimuthal

Pressure  
Plane 1  
100  
72  
44  
16  
-12  
-40  
[Pa]

$J=1$

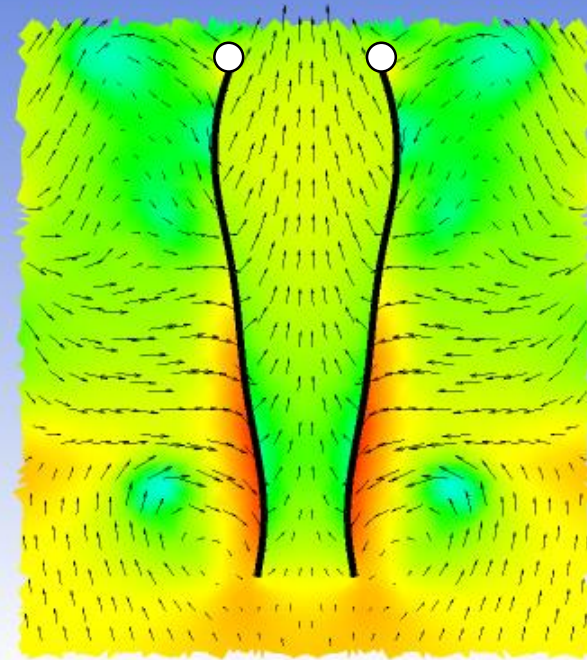

ANSYS  
R16.2  
Azimuthal



Pressure  
Plane 1  
100  
72  
44  
16  
-12  
-40  
[Pa]

$J=0$

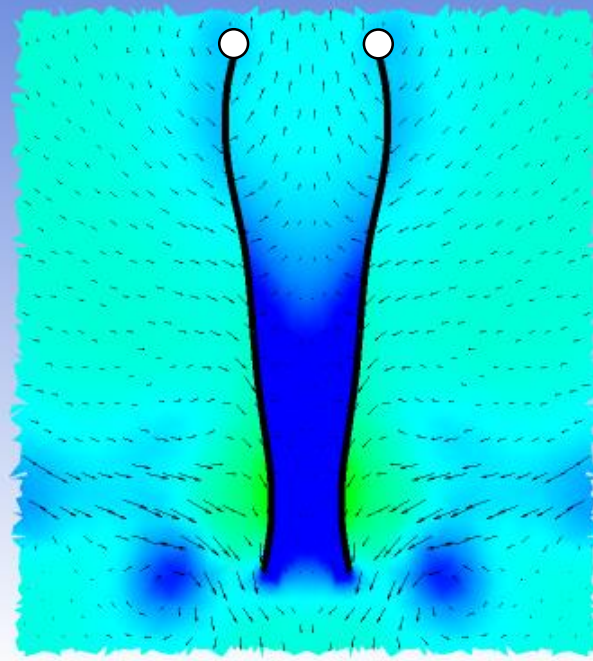

$t/T=0.27$

Pressure  
Plane 1  
100  
72  
44  
16  
-12  
-40  
[Pa]

$J=0.5$

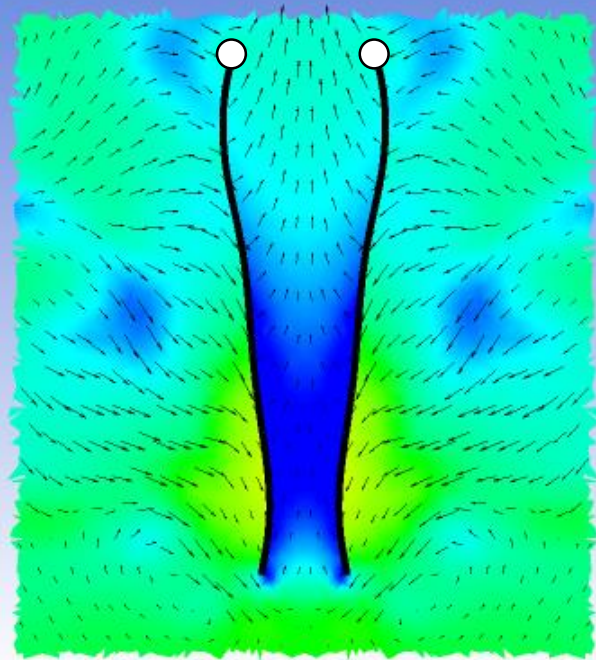

ANSYS  
R16.2  
Azimuthal

Pressure  
Plane 1  
100  
72  
44  
16  
-12  
-40  
[Pa]

$J=1$

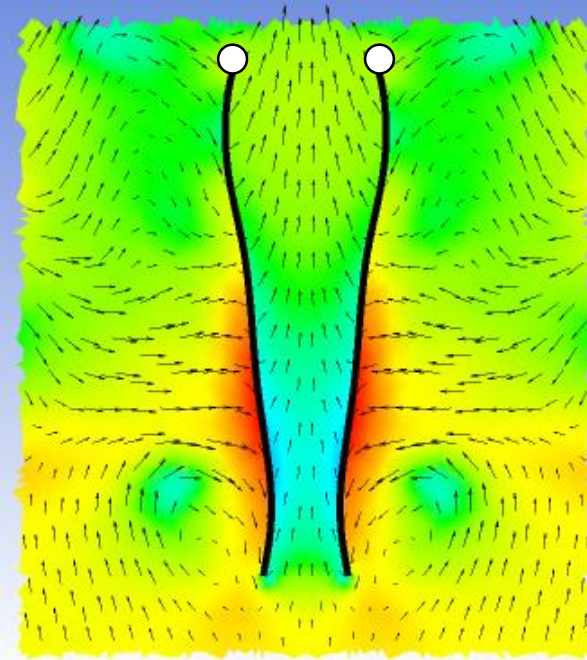



Pressure  
Plane 1  
100  
72  
44  
16  
-12  
-40  
[Pa]

$J=0$

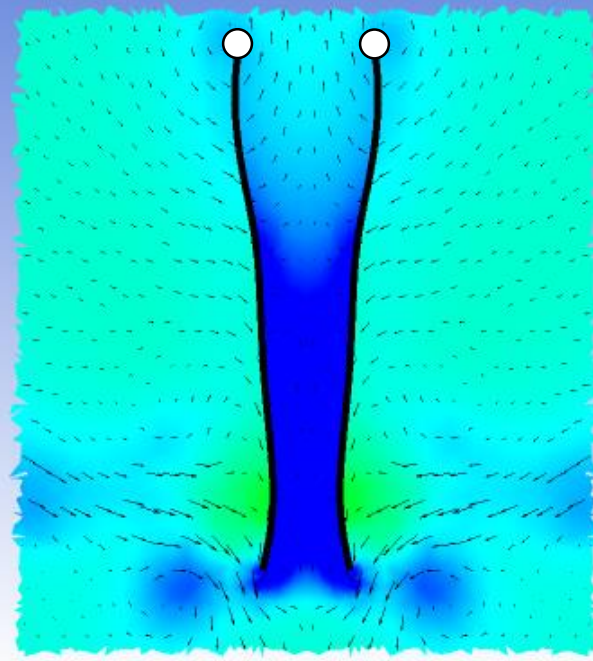

$t/T=0.28$

ANSYS  
Fluent  
Axisymmetric

Pressure  
Plane 1  
100  
72  
44  
16  
-12  
-40  
[Pa]

$J=0.5$

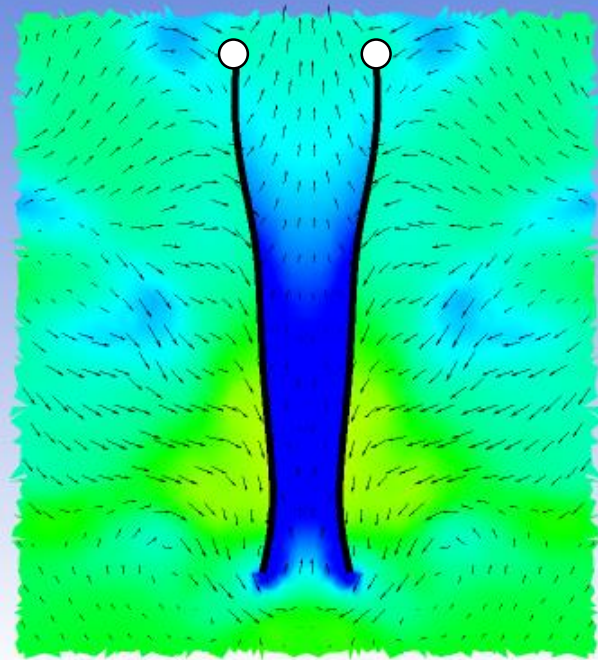

ANSYS  
Fluent  
Axisymmetric

Pressure  
Plane 1  
100  
72  
44  
16  
-12  
-40  
[Pa]

$J=1$

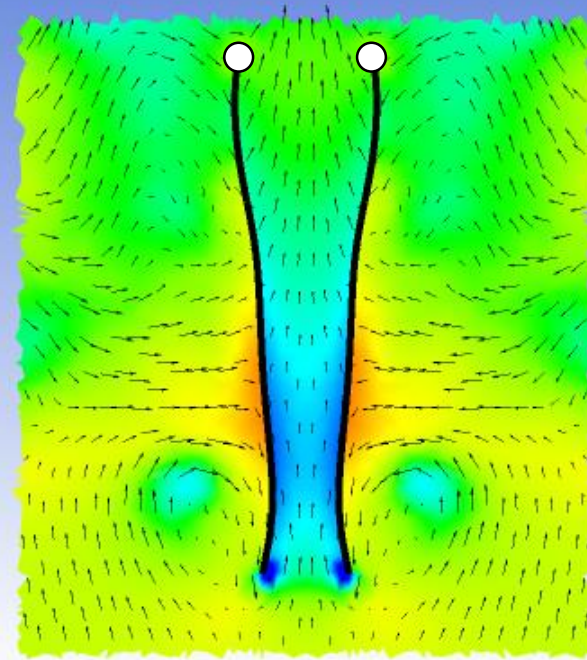

ANSYS  
Fluent  
Axisymmetric

Pressure  
Plane 1  
100  
72  
44  
16  
-12  
-40  
[Pa]

$J=0$

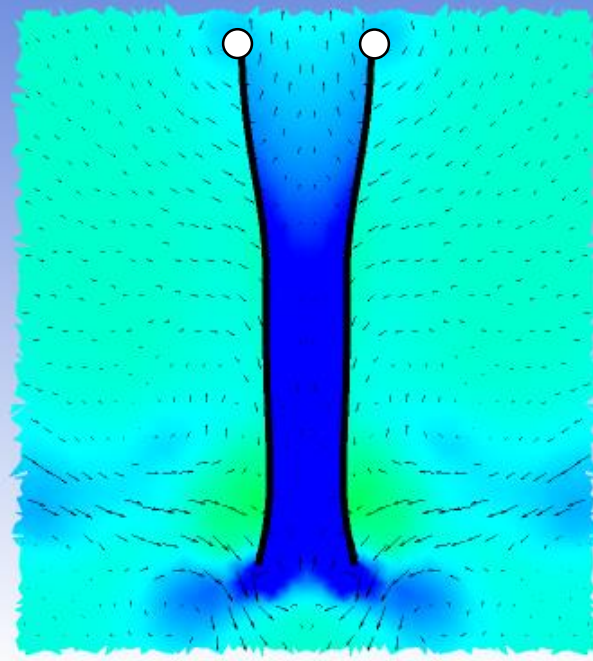

$t/T=0.29$

ANSYS  
Fluent  
Acoustic

Pressure  
Plane 1  
100  
72  
44  
16  
-12  
-40  
[Pa]

$J=0.5$

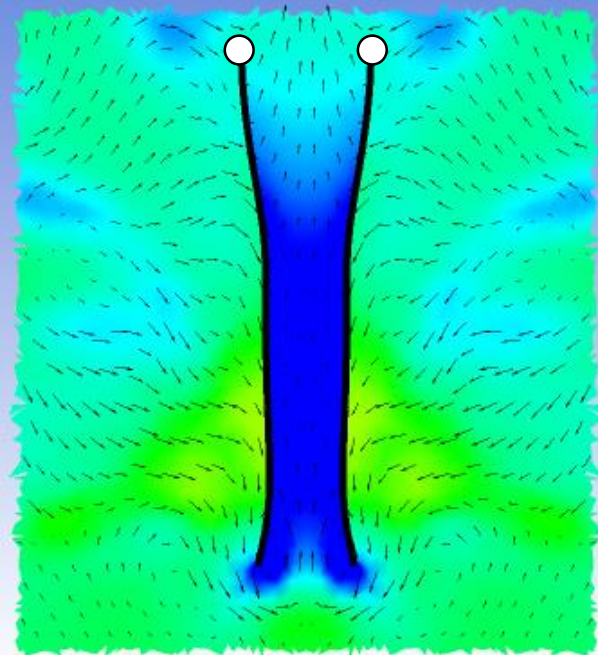

ANSYS  
Fluent  
Acoustic

Pressure  
Plane 1  
100  
72  
44  
16  
-12  
-40  
[Pa]

$J=1$

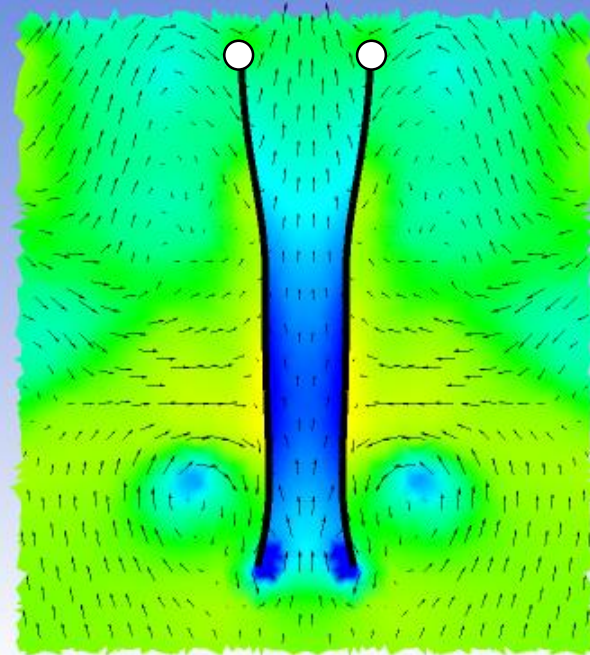

ANSYS  
Fluent  
Acoustic



Pressure  
Plane 1  
100  
72  
44  
16  
-12  
-40  
[Pa]

$J=0$

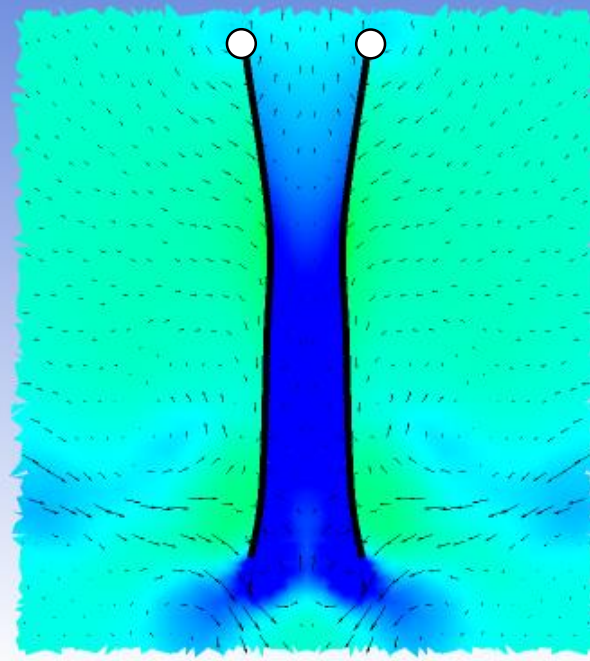

$t/T=0.30$

ANSYS  
R16.2  
Azimuthal

Pressure  
Plane 1  
100  
72  
44  
16  
-12  
-40  
[Pa]

$J=0.5$

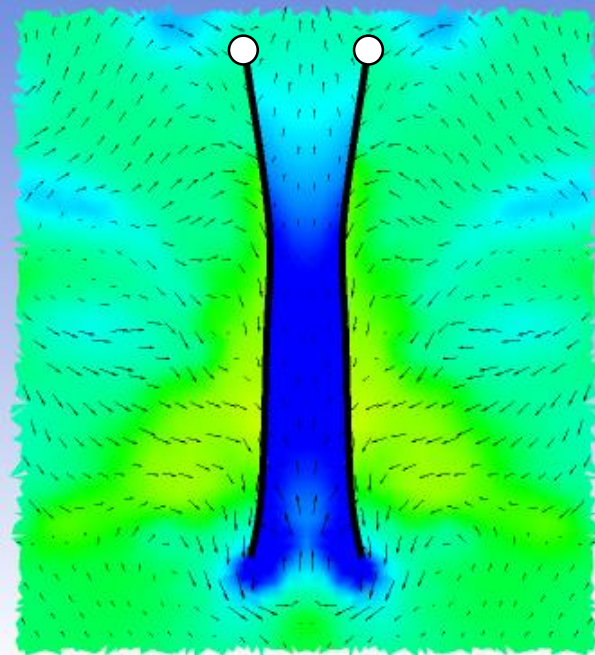

ANSYS  
R16.2  
Azimuthal

Pressure  
Plane 1  
100  
72  
44  
16  
-12  
-40  
[Pa]

$J=1$

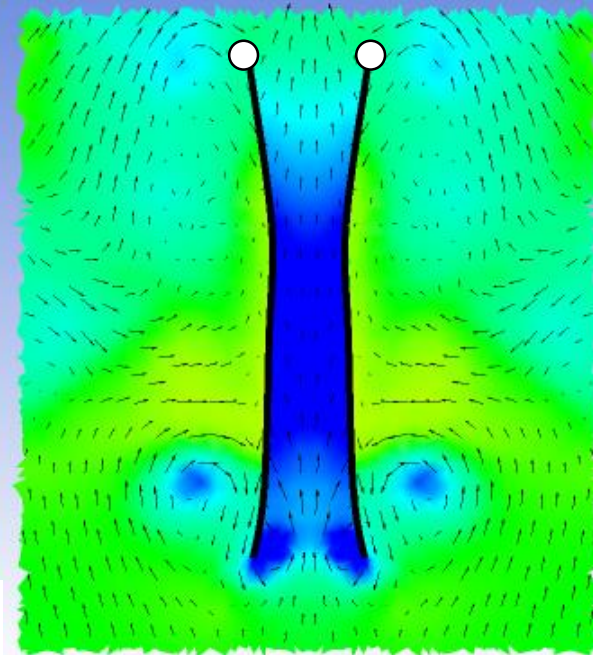

Supplement: s1 [file s1]
