# Supplementary material for: Clap-and-Fling Mechanism in Non-Zero Inflow of a Tailless Two-Winged Flapping-Wing Micro Air Vehicle
Source: MDPI journal article supplement (doi:10.3390/aerospace9020108), 2022-02-16

Figure S4: Flow fields in  $50\%c_m$ -plane during up-stroke reversal. For all values of  $J$ , the wing distance is 16 mm. The black curves are the intersections between the wings and the plane. The wing roots are marked with white circles.

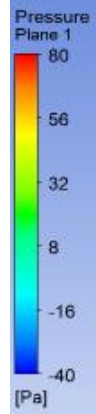

$t/T=0.73$

ANSYS  
816.2  
Acoustic

$J=0$

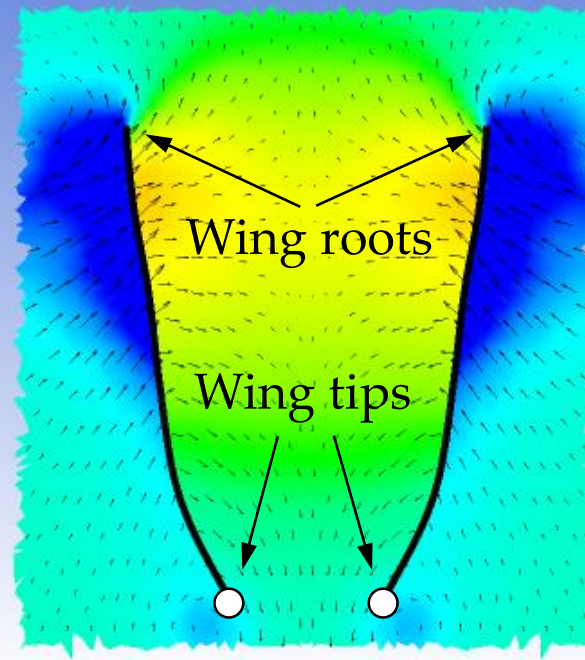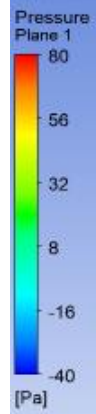

$J=0.5$

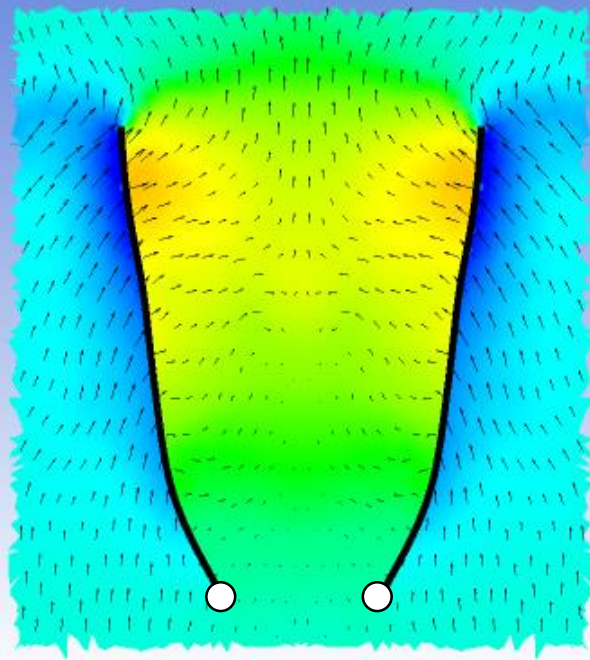

ANSYS  
816.2  
Acoustic

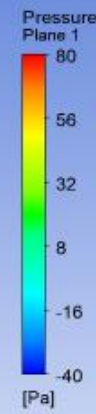

$J=1$

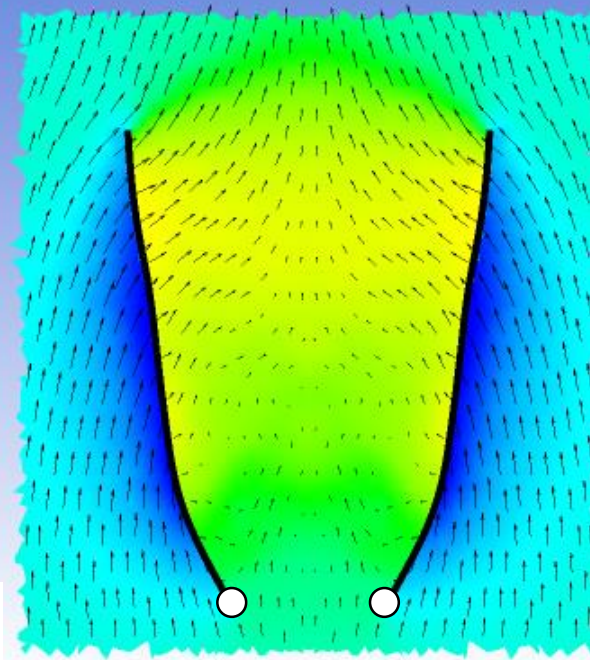

ANSYS  
816.2  
Acoustic

Pressure  
Plane 1  
80  
56  
32  
8  
-16  
-40  
[Pa]

$J=0$

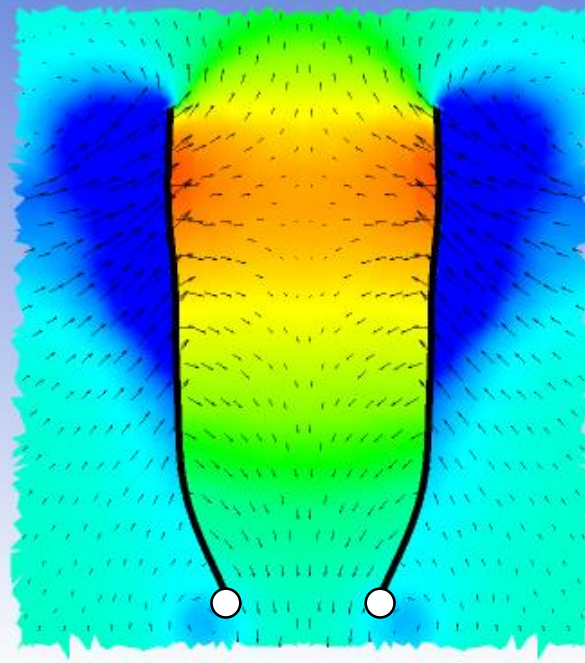

$t/T=0.74$

ANSYS  
Fluent  
Acoustic

Pressure  
Plane 1  
80  
56  
32  
8  
-16  
-40  
[Pa]

$J=0.5$

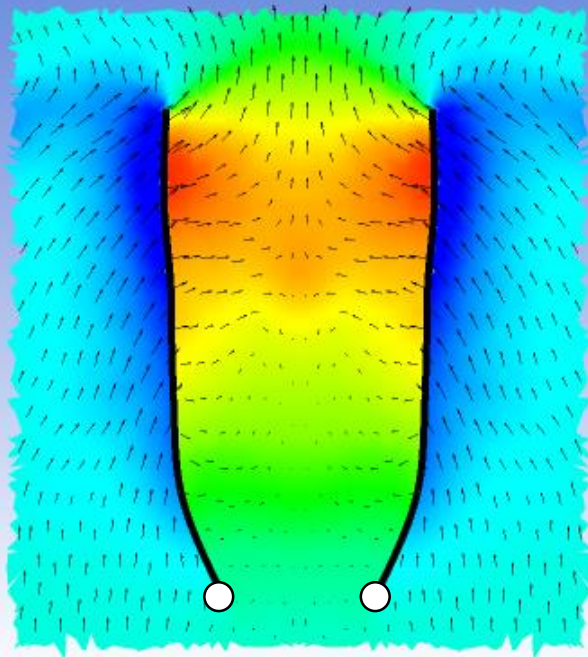

ANSYS  
Fluent  
Acoustic

Pressure  
Plane 1  
80  
56  
32  
8  
-16  
-40  
[Pa]

$J=1$

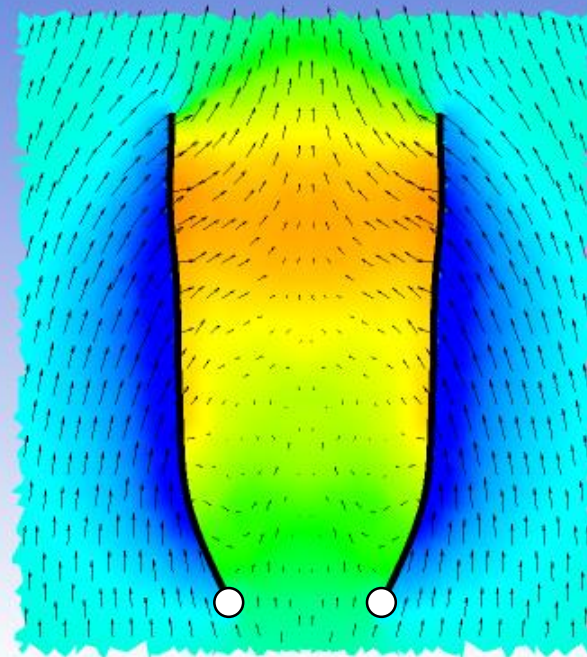

ANSYS  
Fluent  
Acoustic

Pressure  
Plane 1  
80  
56  
32  
8  
-16  
-40  
[Pa]

$J=0$

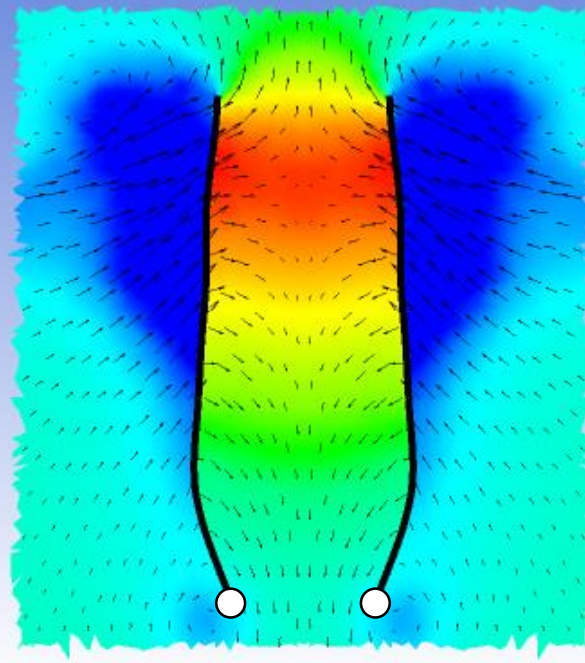

$t/T=0.75$

ANSYS  
Fluent  
Axisymmetric

Pressure  
Plane 1  
80  
56  
32  
8  
-16  
-40  
[Pa]

$J=0.5$

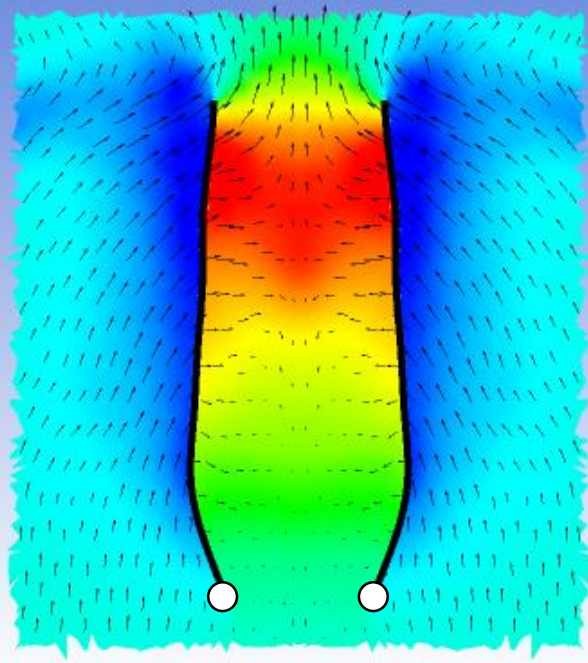

ANSYS  
Fluent  
Axisymmetric

Pressure  
Plane 1  
80  
56  
32  
8  
-16  
-40  
[Pa]

$J=1$

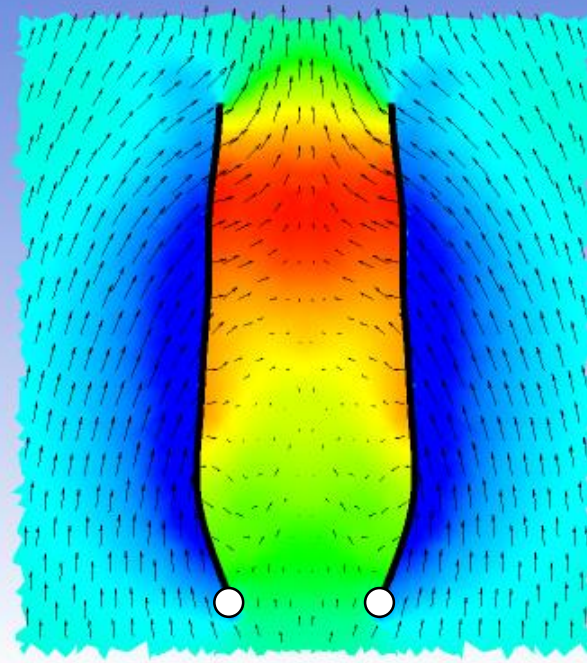

ANSYS  
Fluent  
Axisymmetric

Pressure  
Plane 1  
80  
56  
32  
8  
-16  
-40  
[Pa]

$J=0$

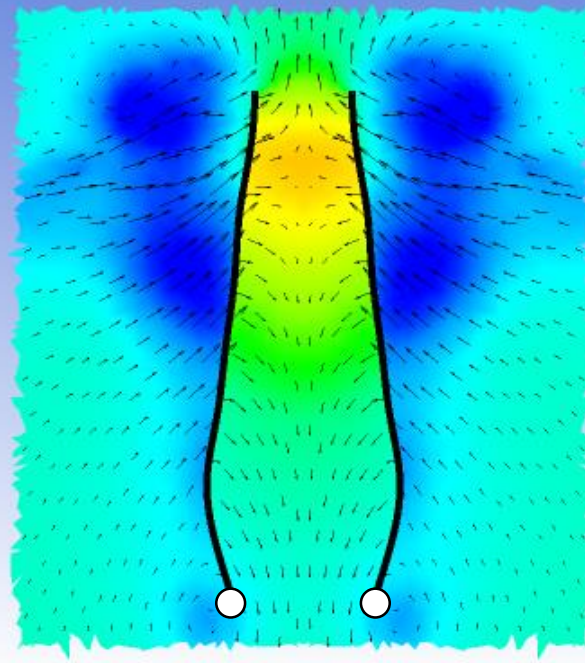

$t/T=0.76$

ANSYS  
Fluent  
Axisymmetric

Pressure  
Plane 1  
80  
56  
32  
8  
-16  
-40  
[Pa]

$J=0.5$

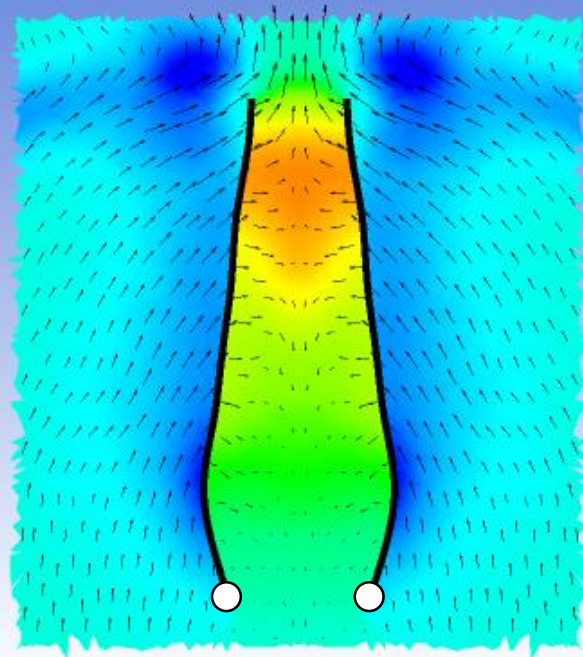

ANSYS  
Fluent  
Axisymmetric

Pressure  
Plane 1  
80  
56  
32  
8  
-16  
-40  
[Pa]

$J=1$

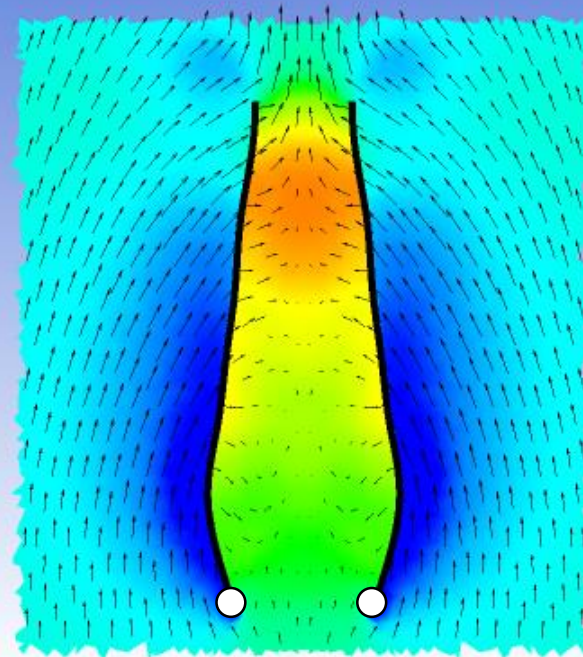

ANSYS  
Fluent  
Axisymmetric

Pressure  
Plane 1  
80  
56  
32  
8  
-16  
-40  
[Pa]

$J=0$

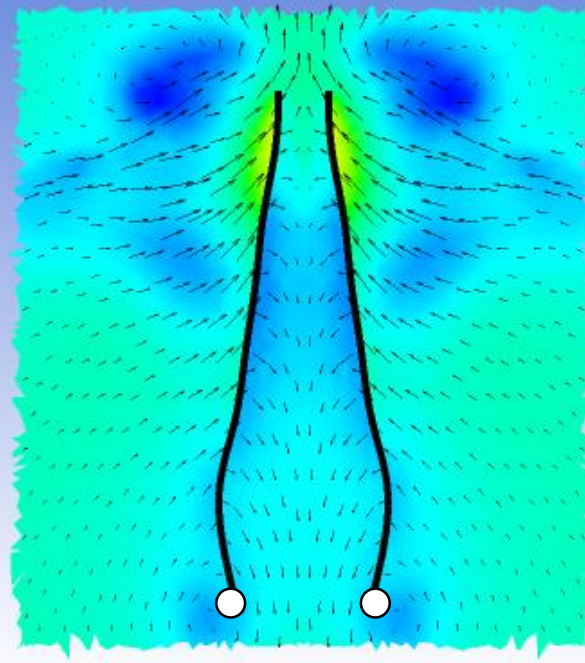

$t/T=0.77$

ANSYS  
Fluent  
Axisymmetric

Pressure  
Plane 1  
80  
56  
32  
8  
-16  
-40  
[Pa]

$J=0.5$

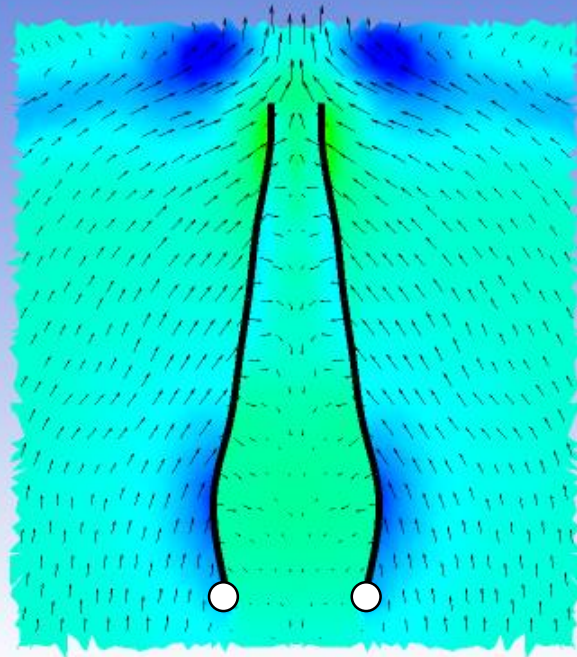

ANSYS  
Fluent  
Axisymmetric

Pressure  
Plane 1  
80  
56  
32  
8  
-16  
-40  
[Pa]

$J=1$

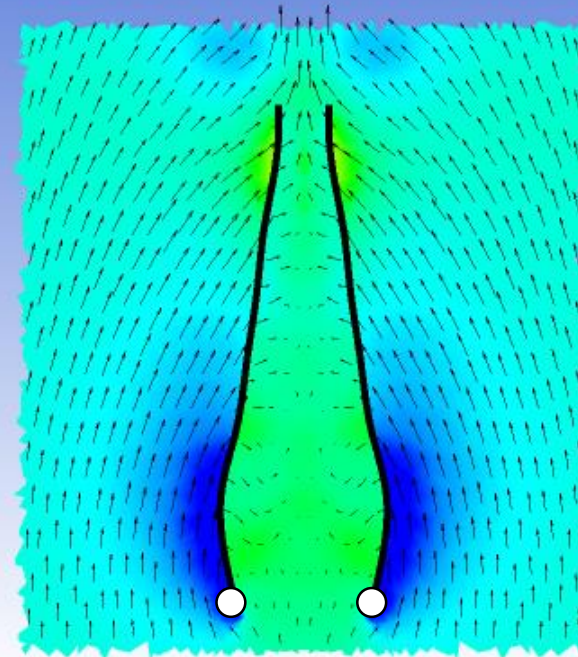

ANSYS  
Fluent  
Axisymmetric

Pressure  
Plane 1  
80  
56  
32  
8  
-16  
-40  
[Pa]

$J=0$

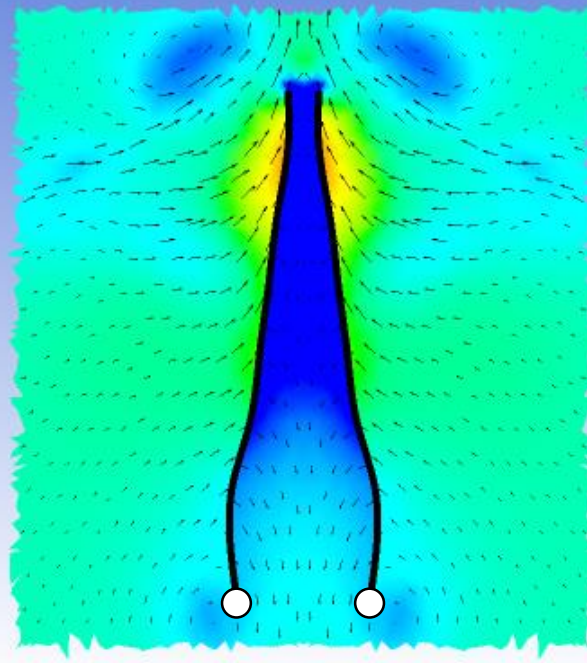

$t/T=0.78$

ANSYS  
Fluent  
Axisymmetric

Pressure  
Plane 1  
80  
56  
32  
8  
-16  
-40  
[Pa]

$J=0.5$

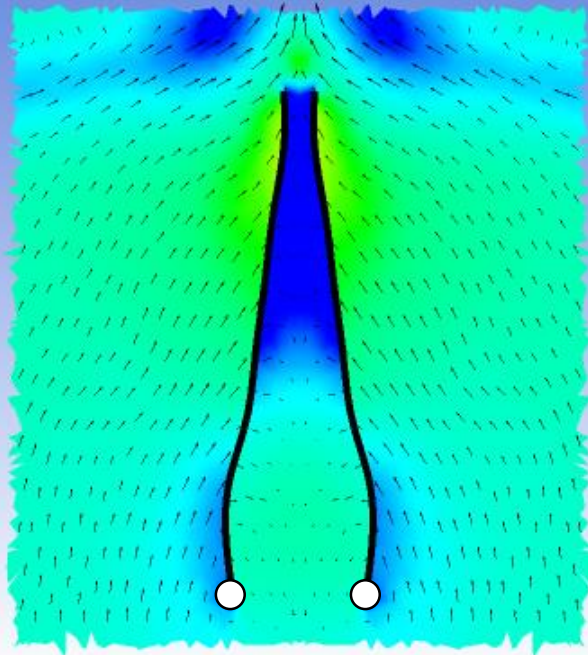

ANSYS  
Fluent  
Axisymmetric

Pressure  
Plane 1  
80  
56  
32  
8  
-16  
-40  
[Pa]

$J=1$

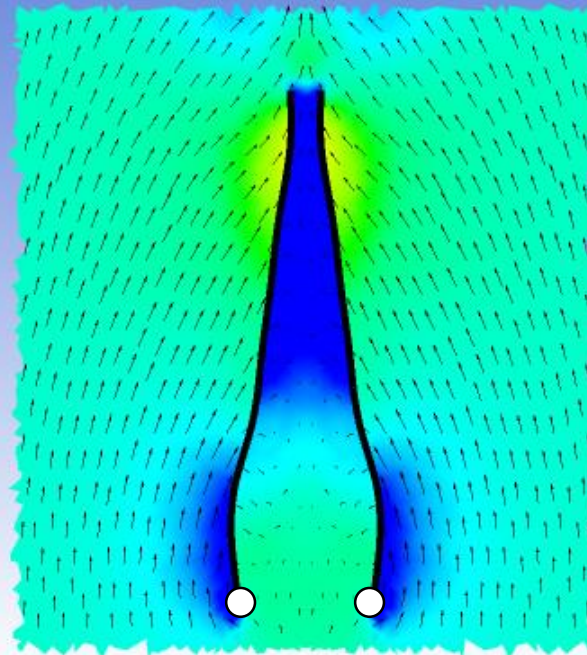

ANSYS  
Fluent  
Axisymmetric

Pressure  
Plane 1  
80  
56  
32  
8  
-16  
-40  
[Pa]

$J=0$

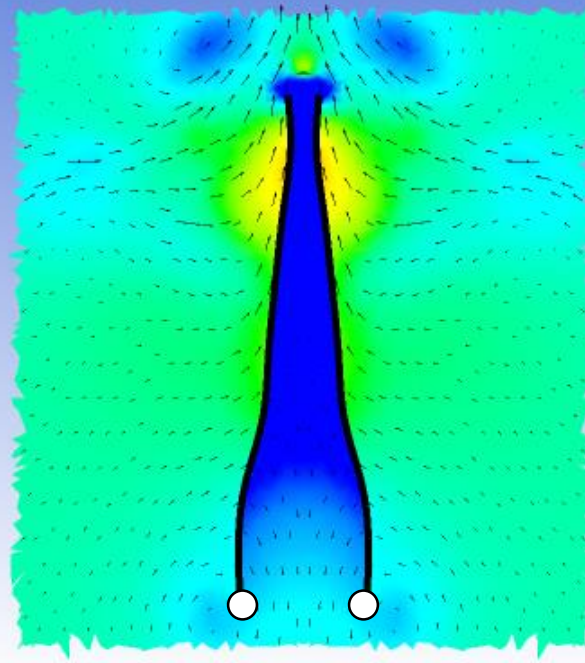

$t/T=0.79$

Pressure  
Plane 1  
80  
56  
32  
8  
-16  
-40  
[Pa]

$J=0.5$

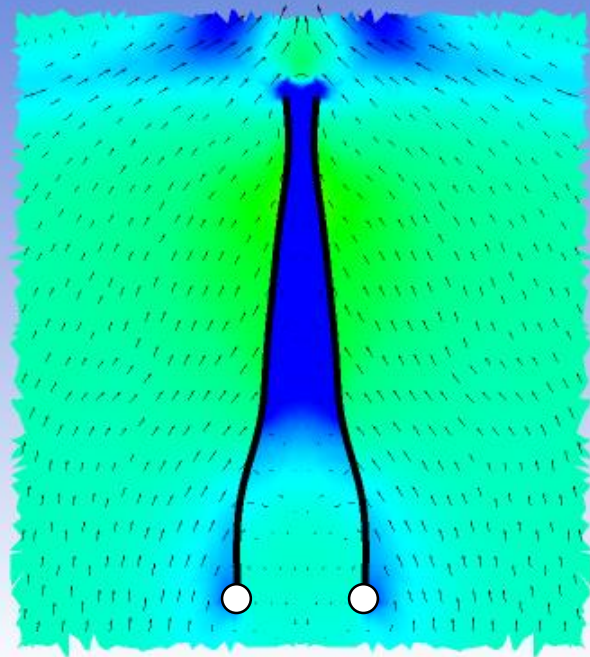

ANSYS  
R16.2  
Acoustic

Pressure  
Plane 1  
80  
56  
32  
8  
-16  
-40  
[Pa]

$J=1$

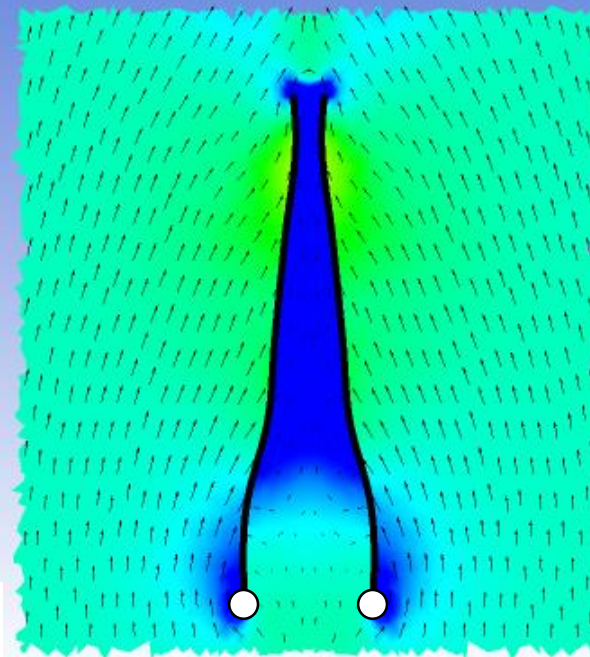

Pressure  
Plane 1  
80  
56  
32  
8  
-16  
-40  
[Pa]

$J=0$

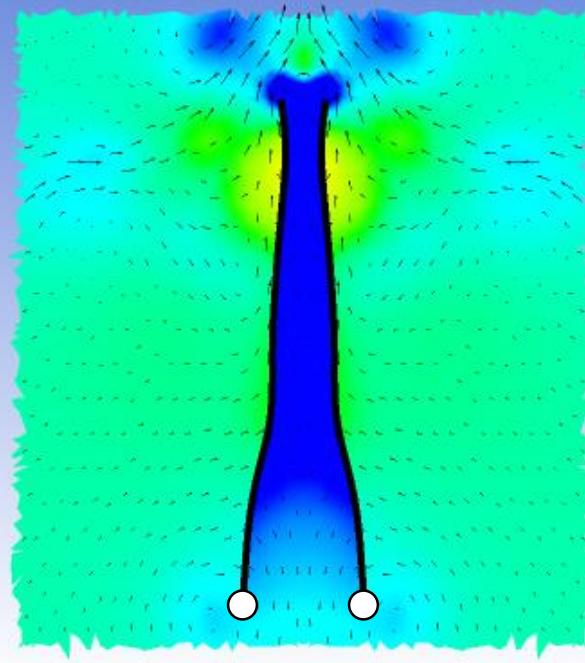

$t/T=0.80$

ANSYS  
R16.2  
Azimuthal

Pressure  
Plane 1  
80  
56  
32  
8  
-16  
-40  
[Pa]

$J=0.5$

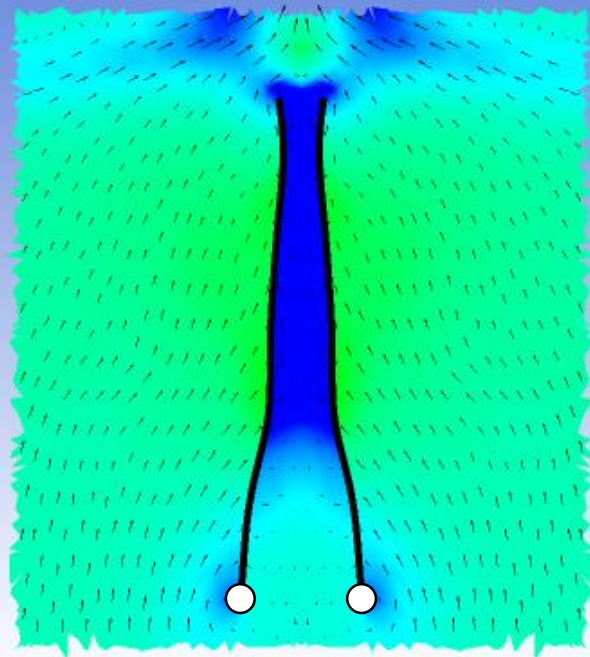

ANSYS  
R16.2  
Azimuthal

Pressure  
Plane 1  
80  
56  
32  
8  
-16  
-40  
[Pa]

$J=1$

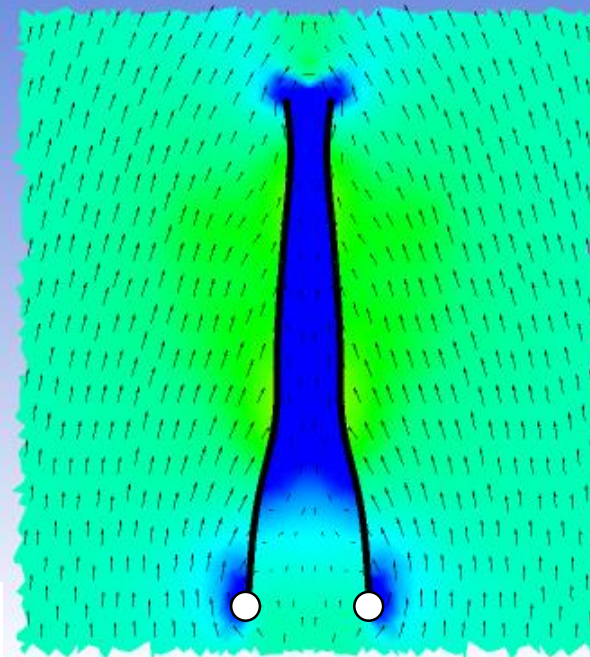

ANSYS  
R16.2  
Azimuthal

Pressure  
Plane 1  
80  
56  
32  
8  
-16  
-40  
[Pa]

$J=0$

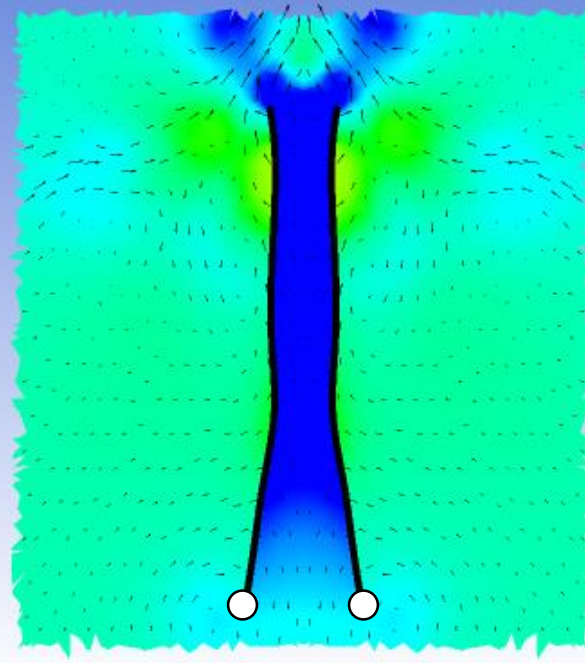

$t/T=0.81$

ANSYS  
816.2  
Axisymmetric

Pressure  
Plane 1  
80  
56  
32  
8  
-16  
-40  
[Pa]

$J=0.5$

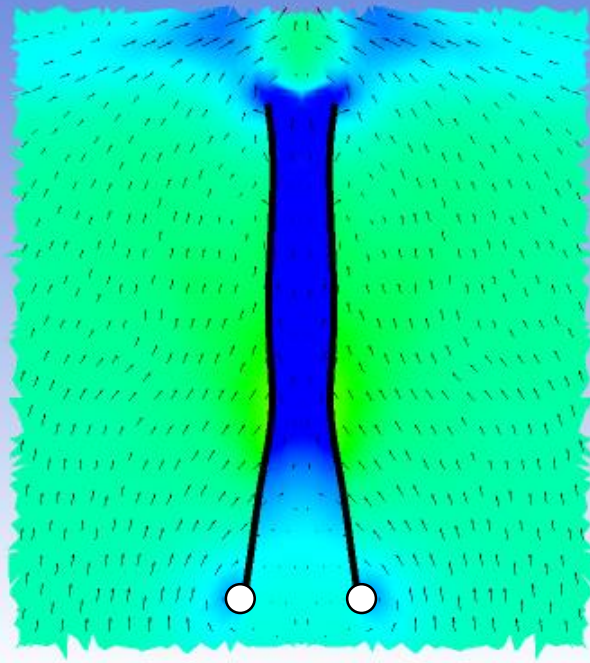

ANSYS  
816.2  
Axisymmetric

Pressure  
Plane 1  
80  
56  
32  
8  
-16  
-40  
[Pa]

$J=1$

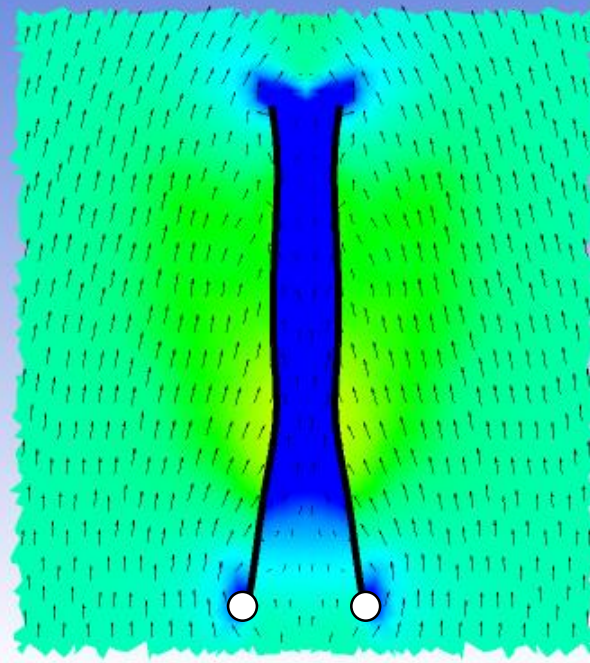

ANSYS  
816.2  
Axisymmetric

Pressure  
Plane 1  
80  
56  
32  
8  
-16  
-40  
[Pa]

$J=0$

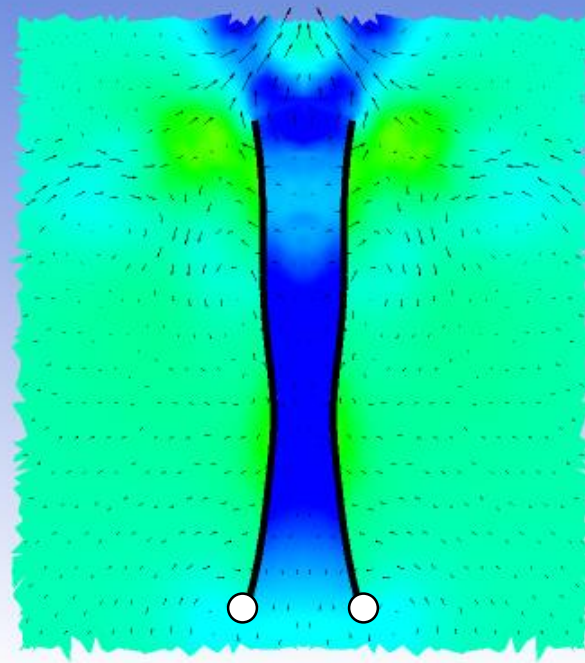

$t/T=0.82$

ANSYS  
Fluent  
Axisymmetric

Pressure  
Plane 1  
80  
56  
32  
8  
-16  
-40  
[Pa]

$J=0.5$

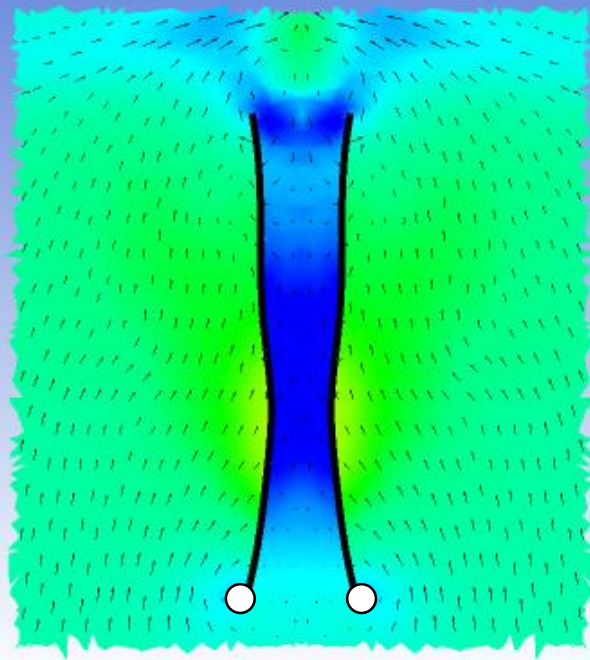

ANSYS  
Fluent  
Axisymmetric

Pressure  
Plane 1  
80  
56  
32  
8  
-16  
-40  
[Pa]

$J=1$

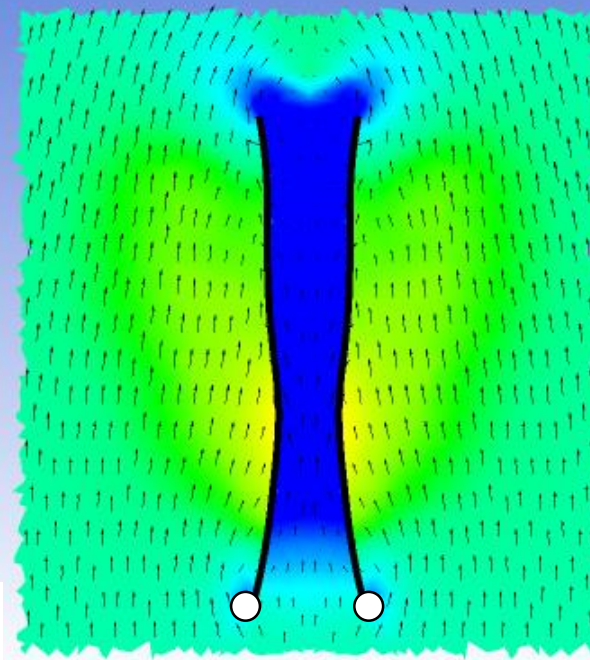

ANSYS  
Fluent  
Axisymmetric

Pressure  
Plane 1  
80  
56  
32  
8  
-16  
-40  
[Pa]

$J=0$

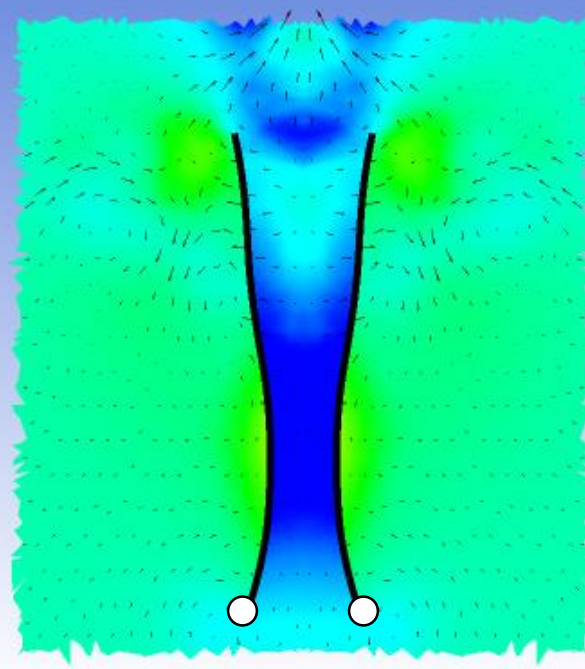

$t/T=0.83$

Pressure  
Plane 1  
80  
56  
32  
8  
-16  
-40  
[Pa]

$J=0.5$

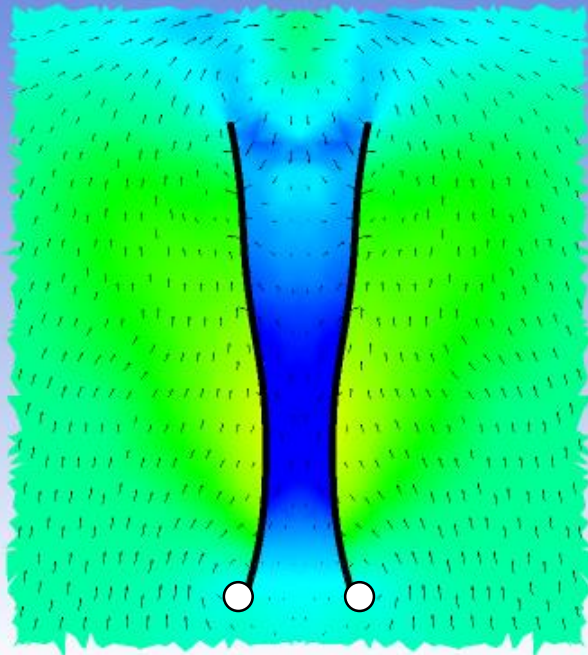

ANSYS  
816.2  
Acoustic

Pressure  
Plane 1  
80  
56  
32  
8  
-16  
-40  
[Pa]

$J=1$

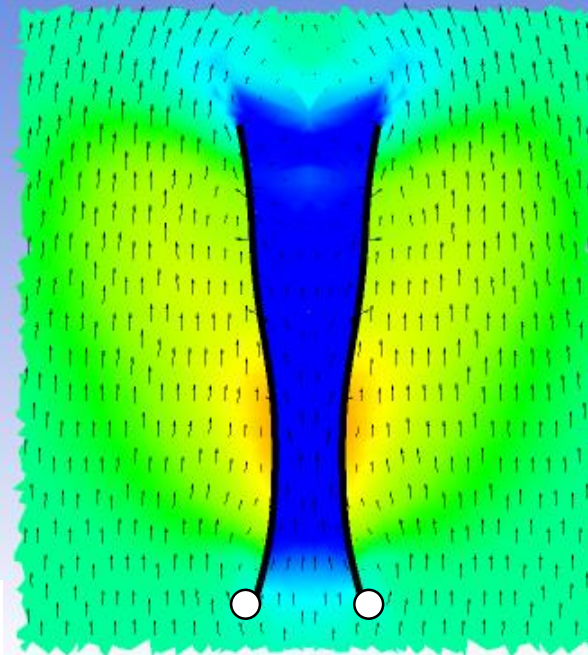

Pressure  
Plane 1  
80  
56  
32  
8  
-16  
-40  
[Pa]

$J=0$

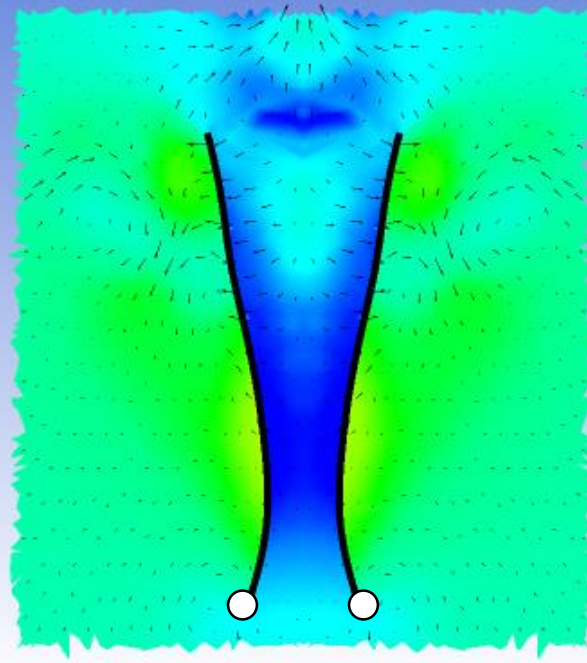

$t/T=0.84$

Pressure  
Plane 1  
80  
56  
32  
8  
-16  
-40  
[Pa]

$J=0.5$

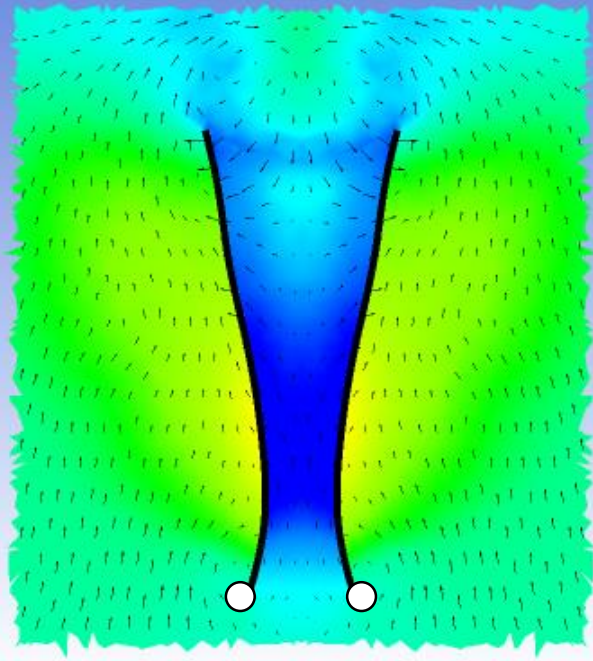

ANSYS  
R16.2  
Azimuthal

Pressure  
Plane 1  
80  
56  
32  
8  
-16  
-40  
[Pa]

$J=1$

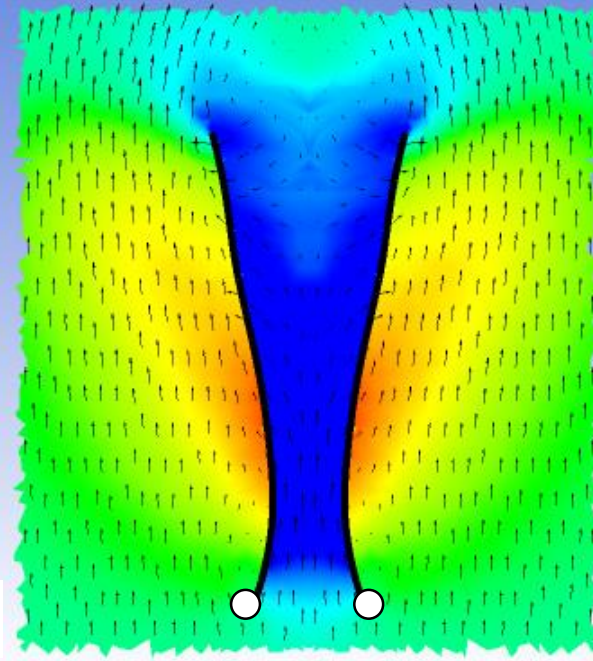

Pressure  
Plane 1  
80  
56  
32  
8  
-16  
-40  
[Pa]

$J=0$

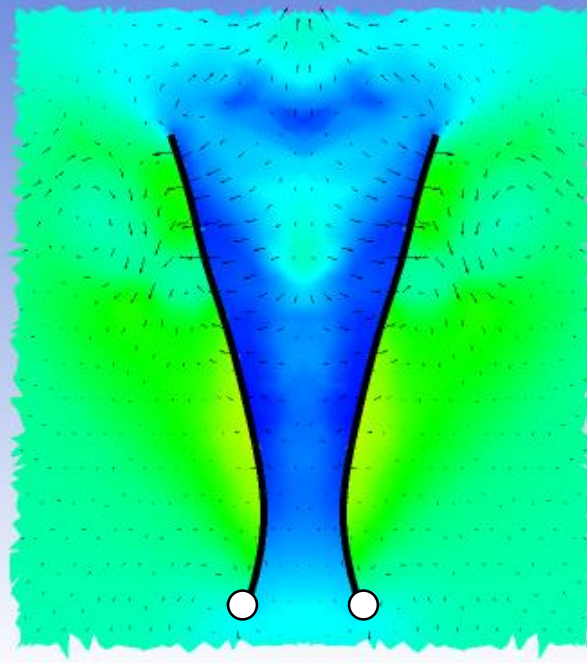

$t/T=0.85$

Pressure  
Plane 1  
80  
56  
32  
8  
-16  
-40  
[Pa]

$J=0.5$

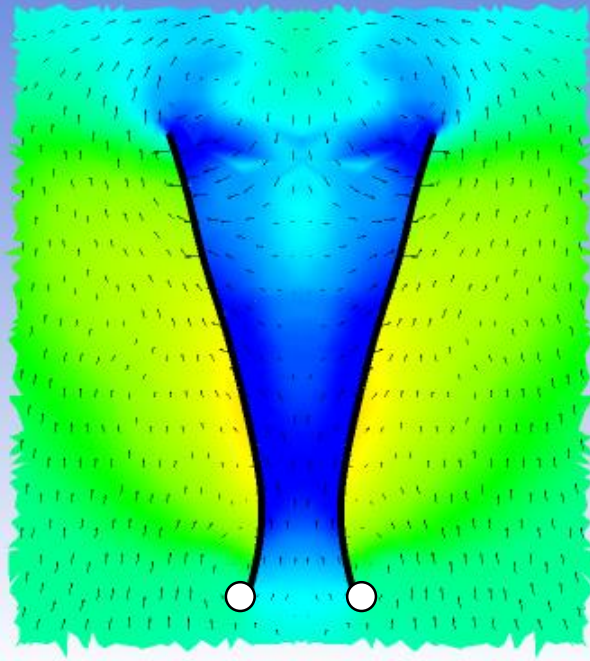

ANSYS  
816.2  
Azimuthal

Pressure  
Plane 1  
80  
56  
32  
8  
-16  
-40  
[Pa]

$J=1$

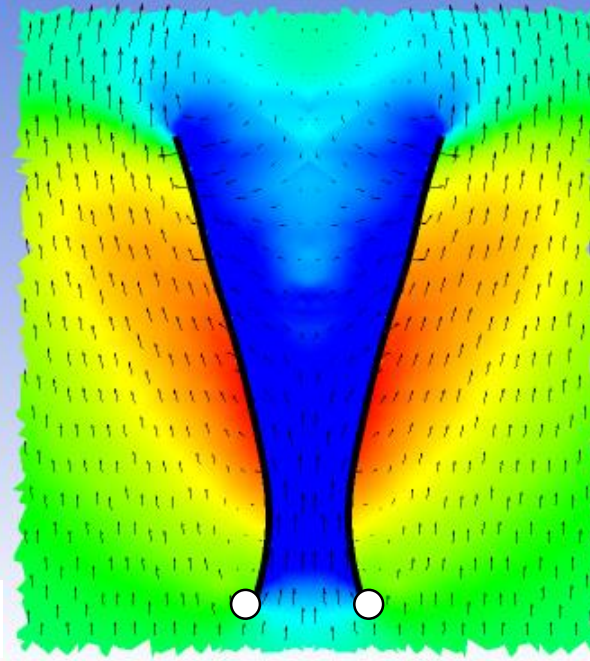

Supplement: s1 [file s1]
