# Supplementary material for: Clap-and-Fling Mechanism in Non-Zero Inflow of a Tailless Two-Winged Flapping-Wing Micro Air Vehicle
Source: MDPI journal article supplement (doi:10.3390/aerospace9020108), 2022-02-16
Supplement: s1 [file s1]

Figure S1: Flow fields in 75% $R$ -plane during down-stroke reversal for  $J = 0$ . The white curves are the intersections between the wings and the plane, representing wing sections. The leading edges are marked with white circles.

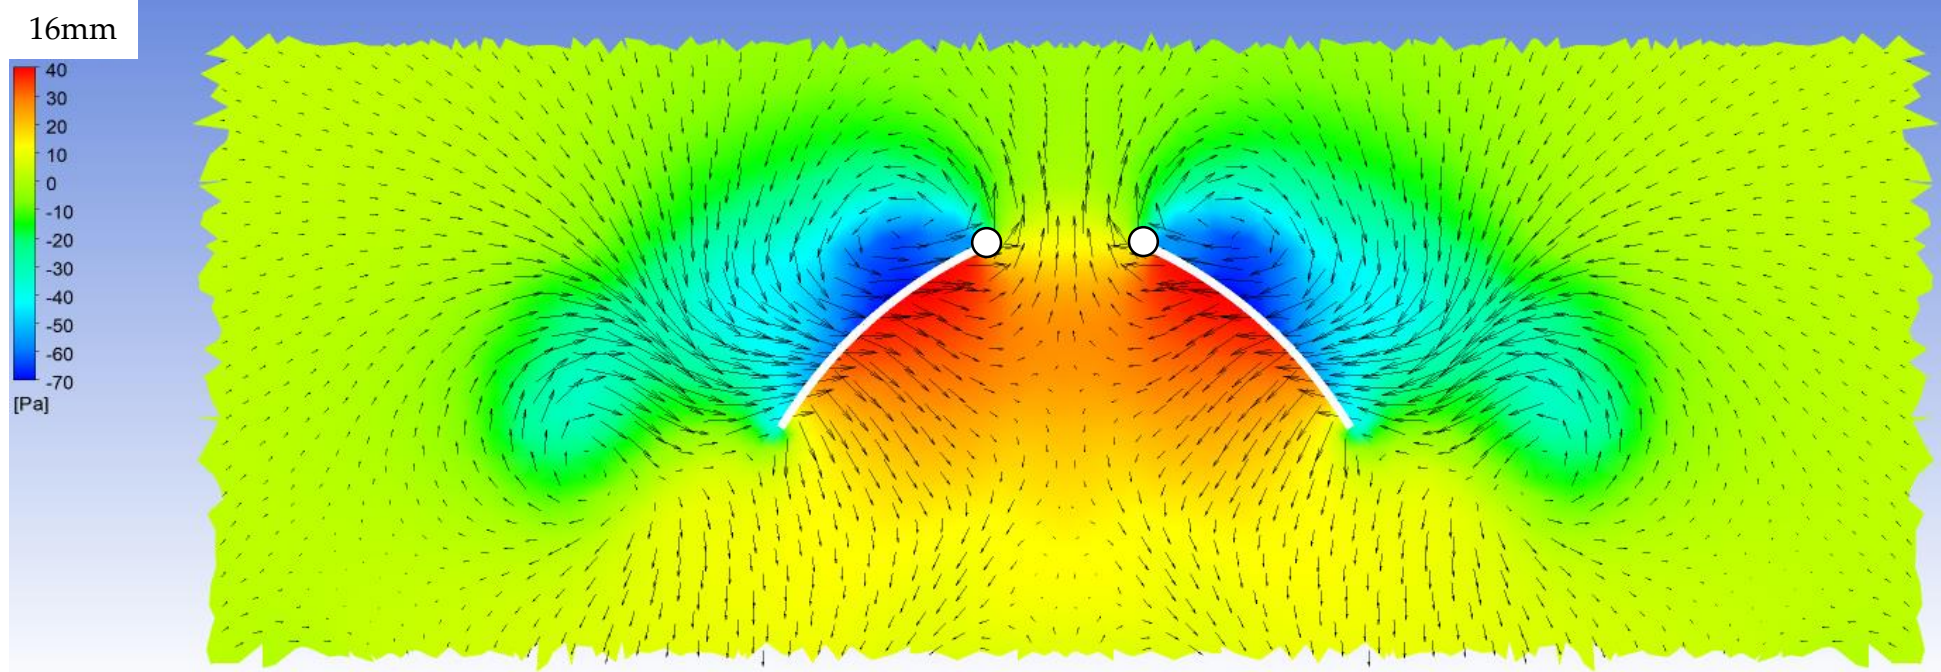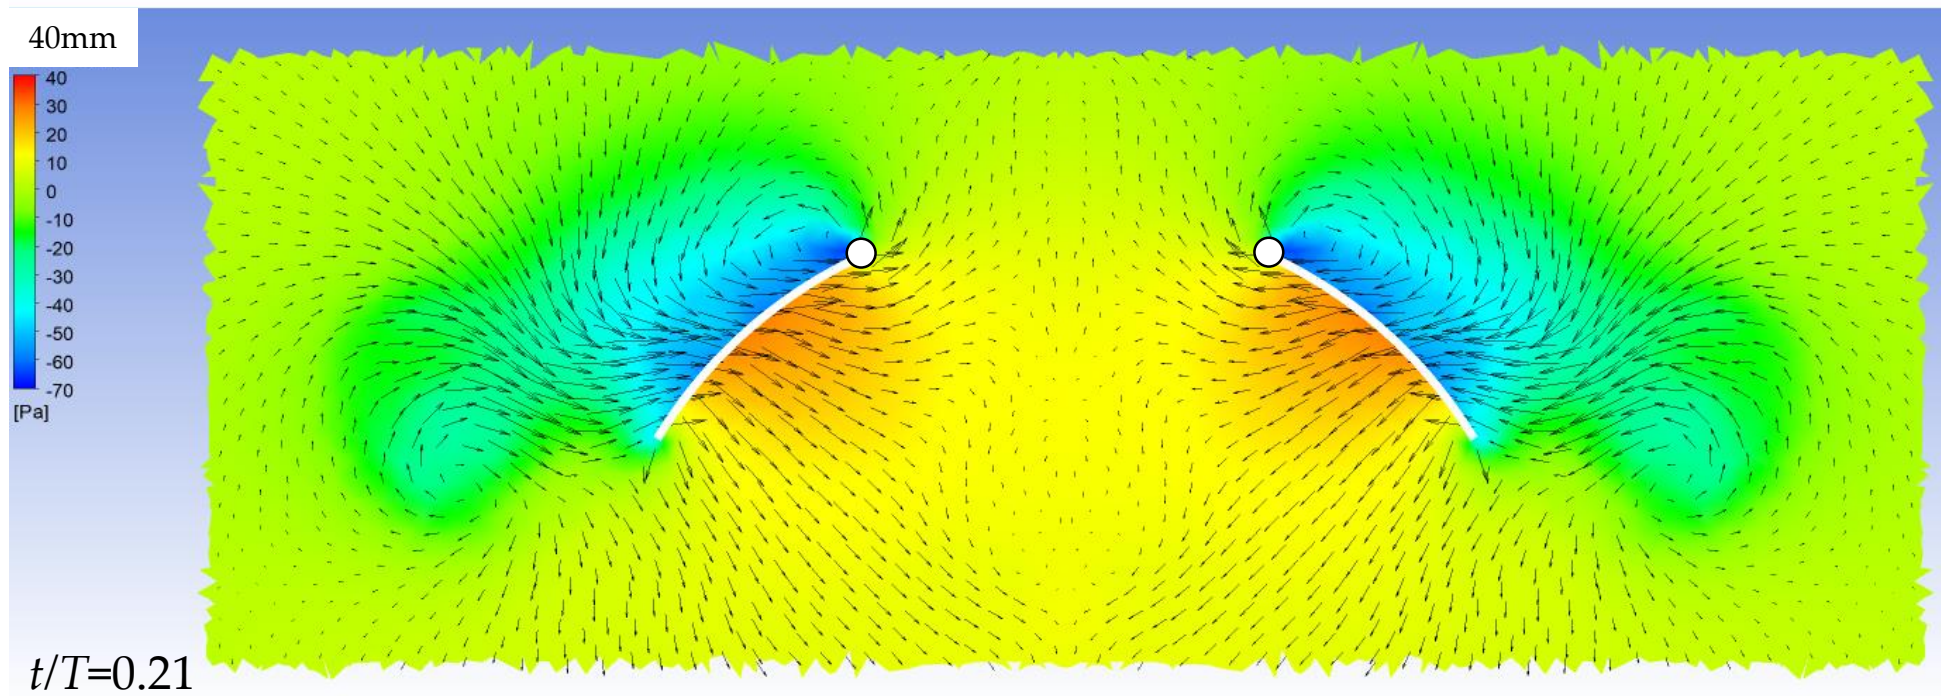



16mm

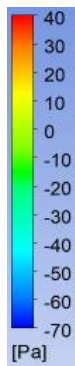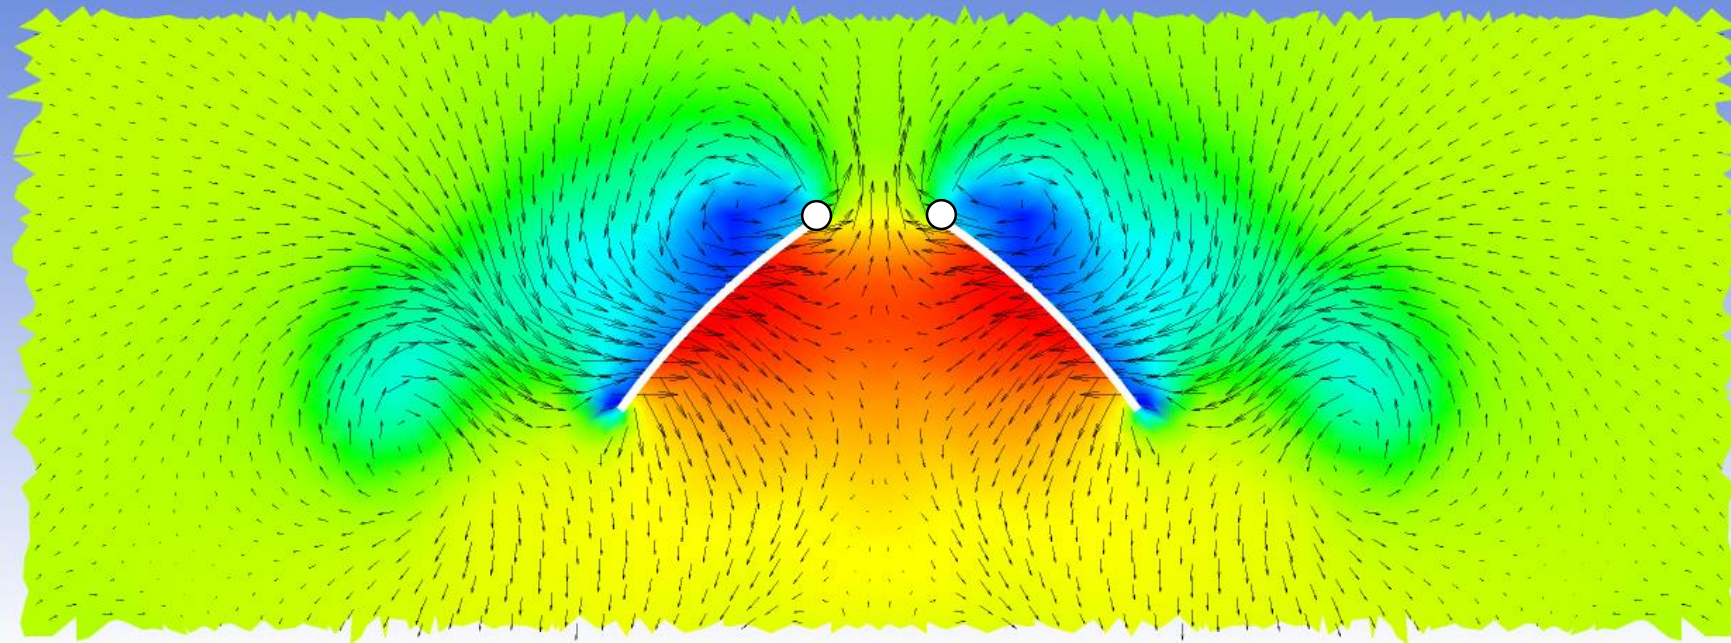

ANSYS  
R16.2  
Academic

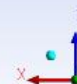

40mm

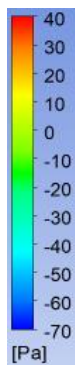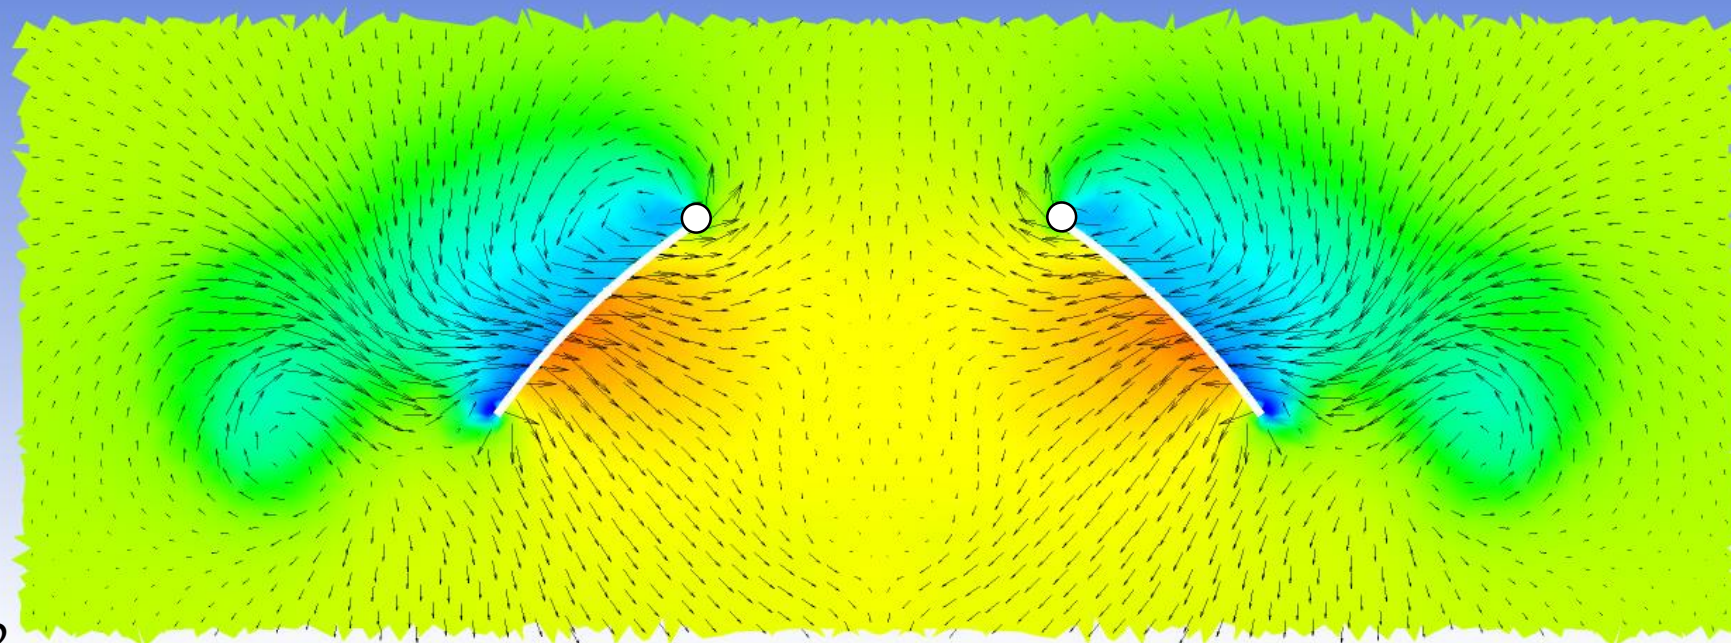

ANSYS  
R16.2  
Academic

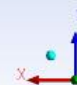

$t/T=0.22$



16mm

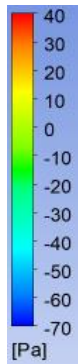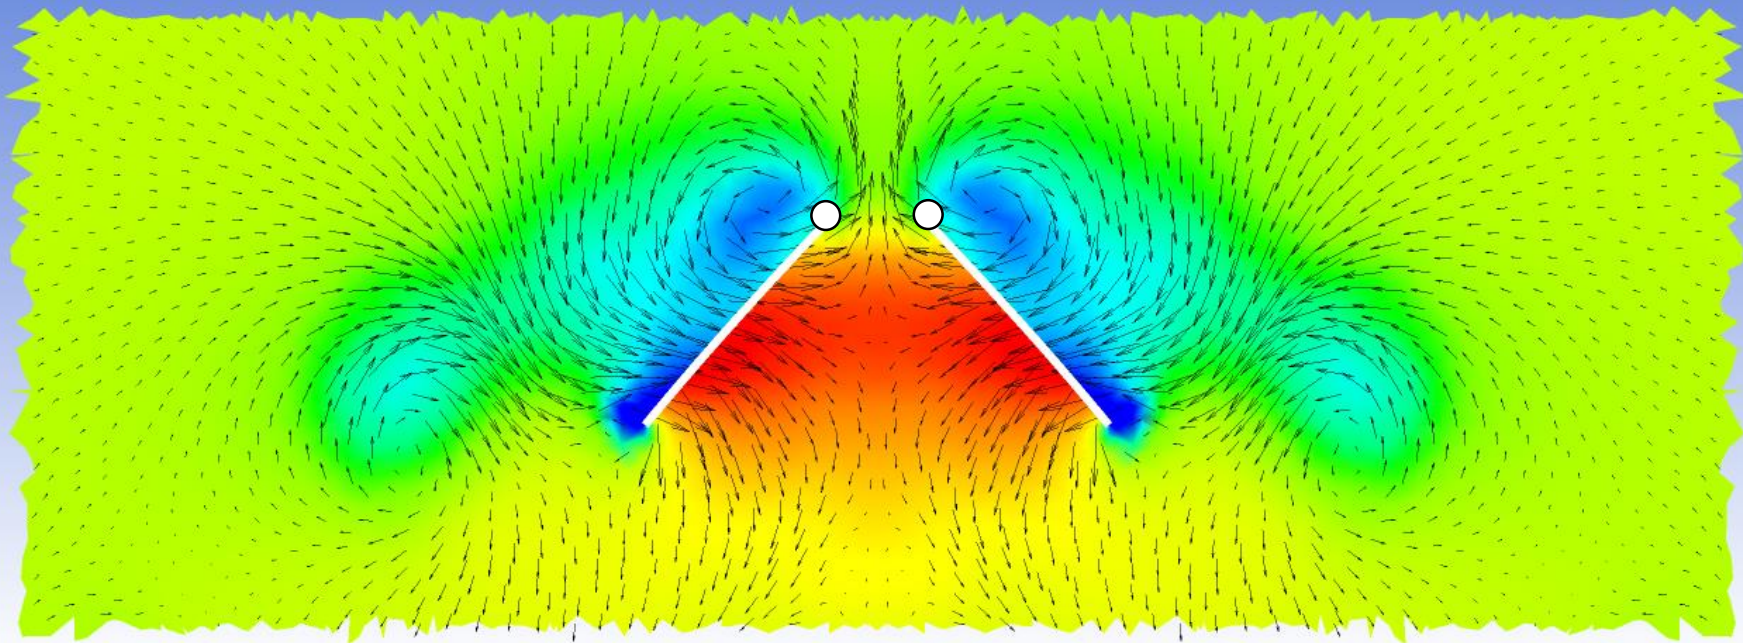

ANSYS  
R16.2  
Academic

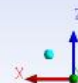

40mm

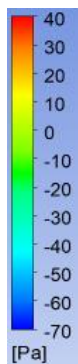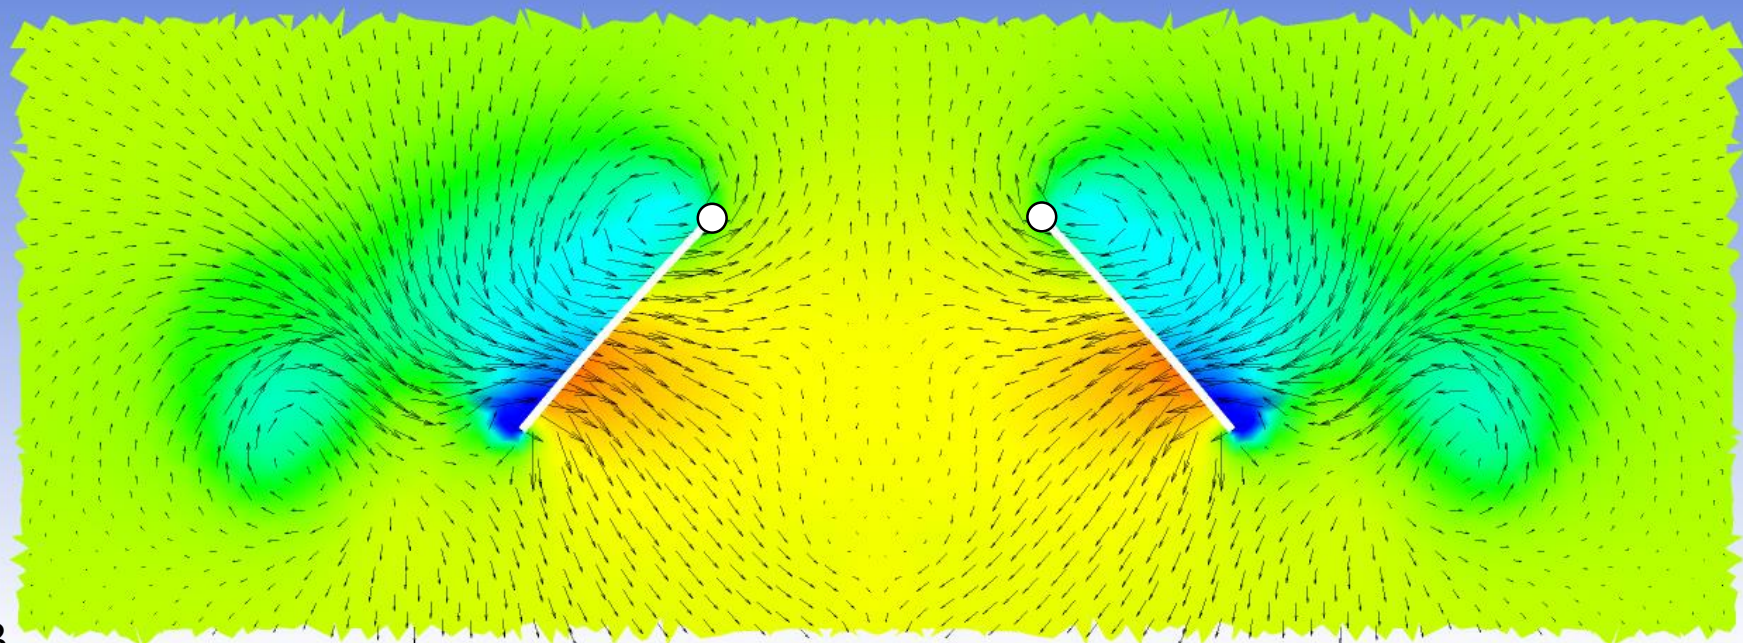

ANSYS  
R16.2  
Academic

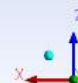

$t/T=0.23$



16mm

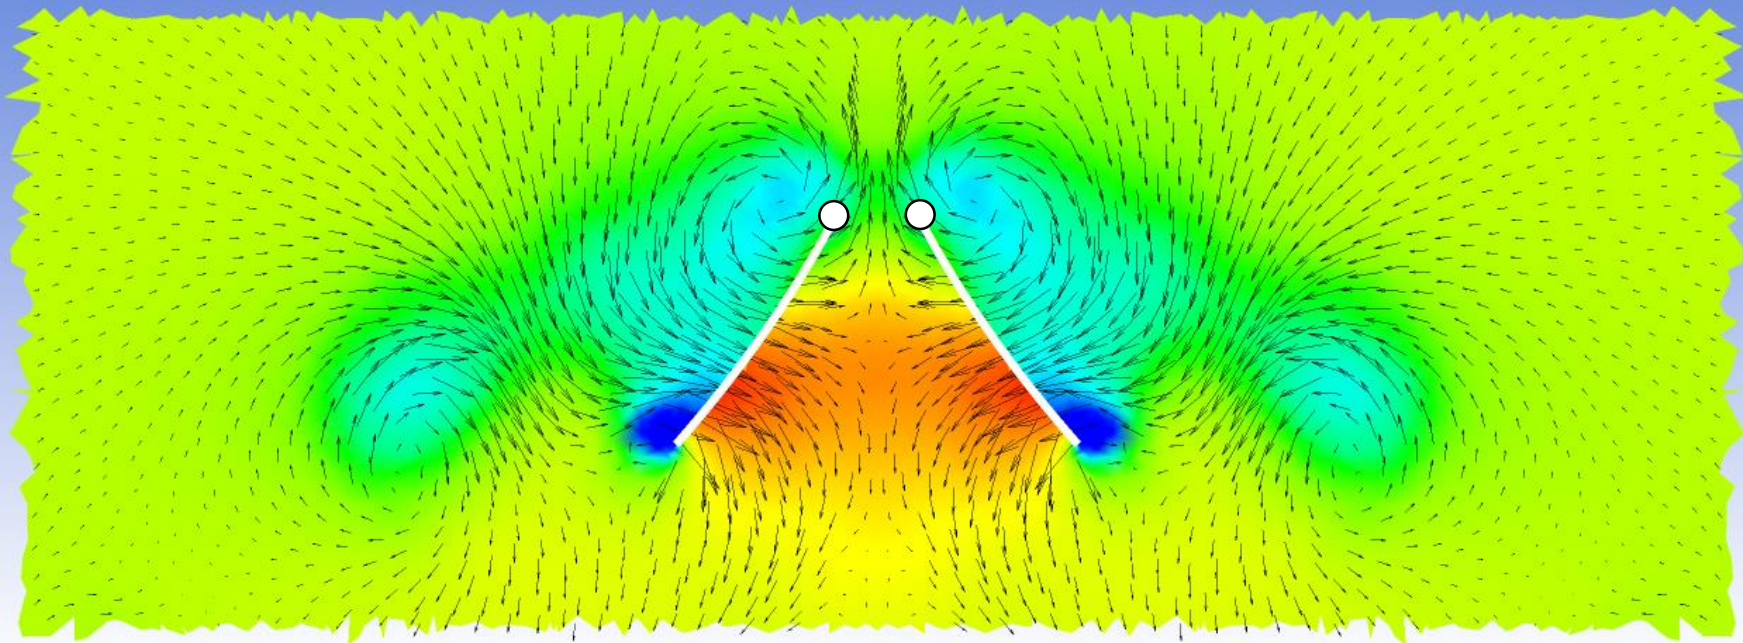

40mm

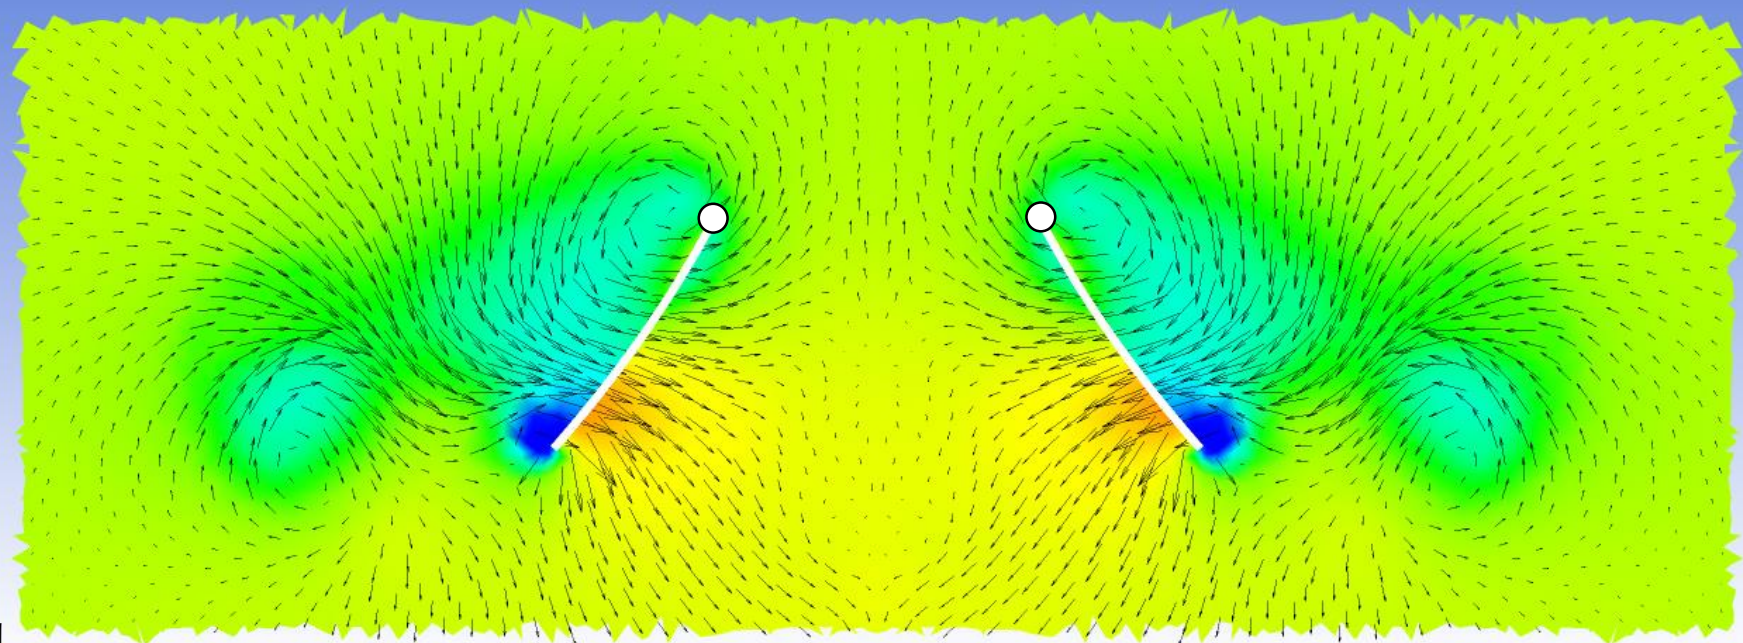

$t/T=0.24$



16mm

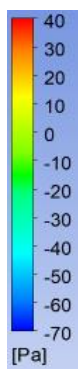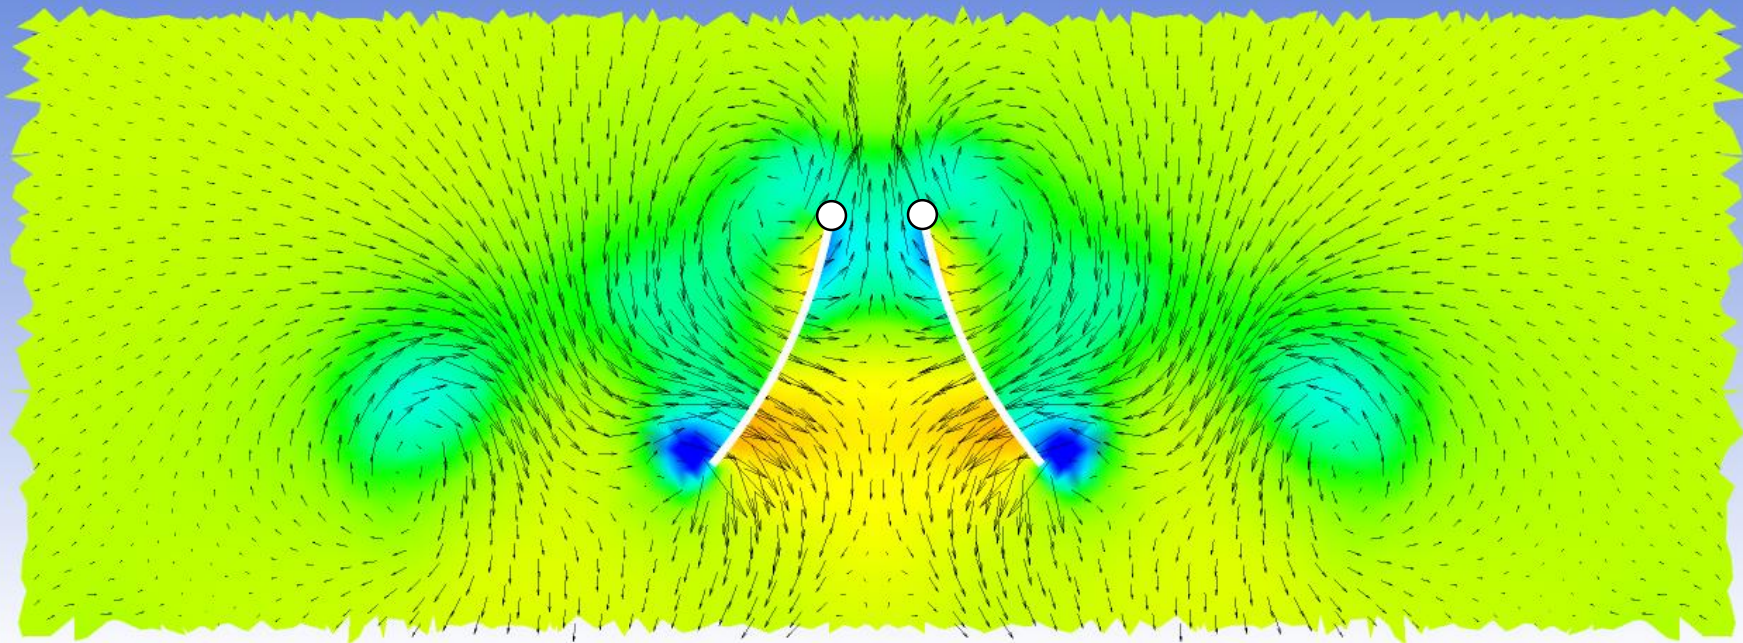

40mm

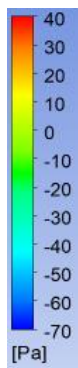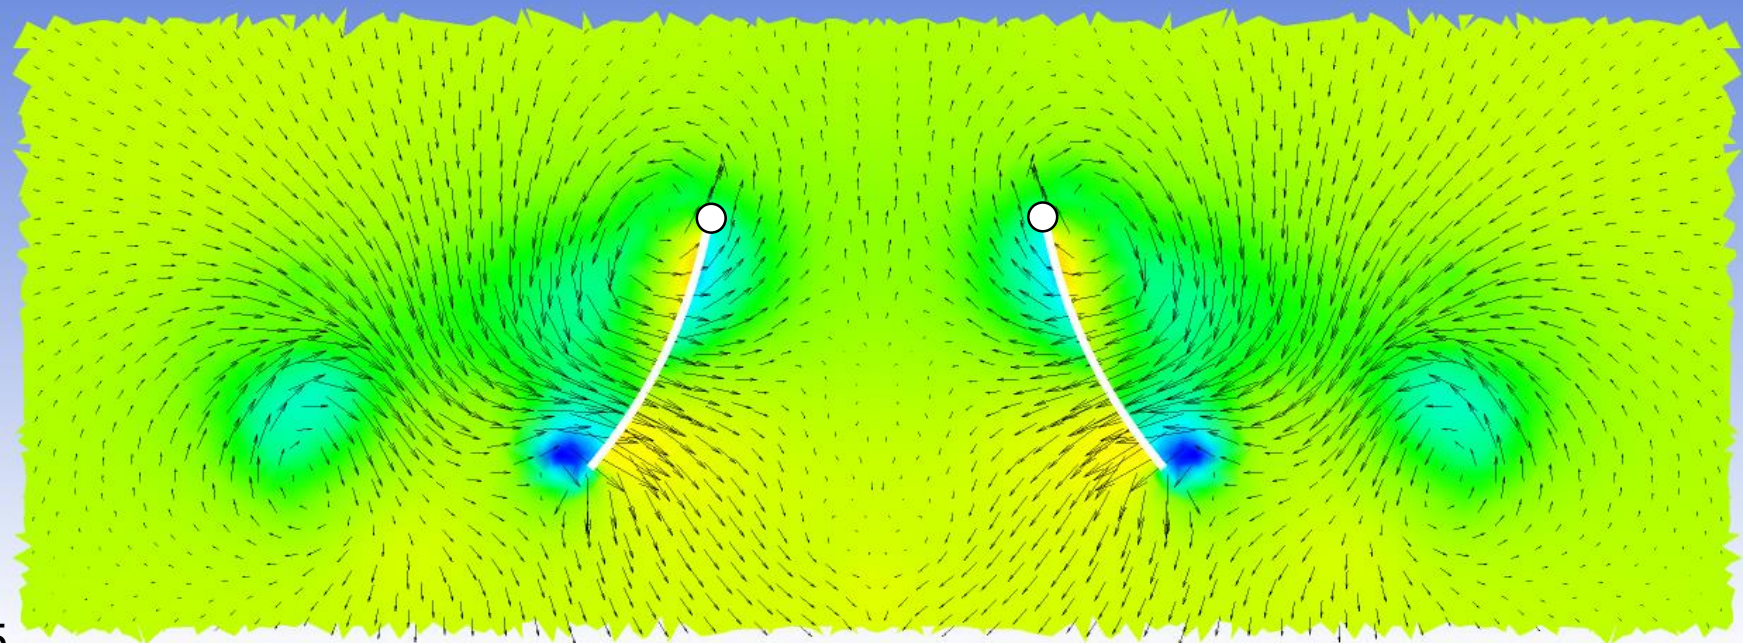

$t/T=0.25$



16mm

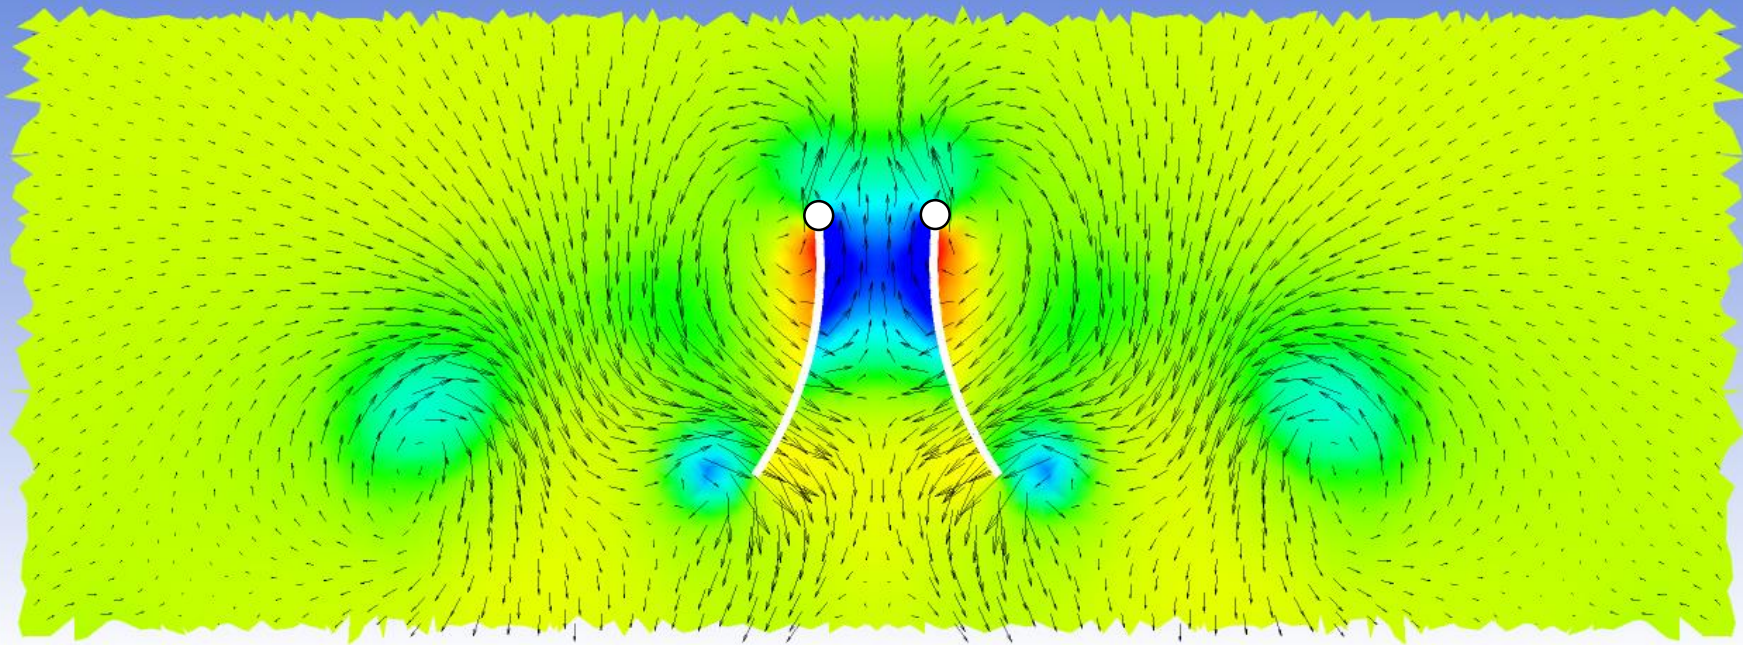

ANSYS  
R16.2  
Academic

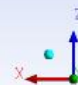

40mm

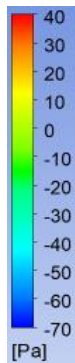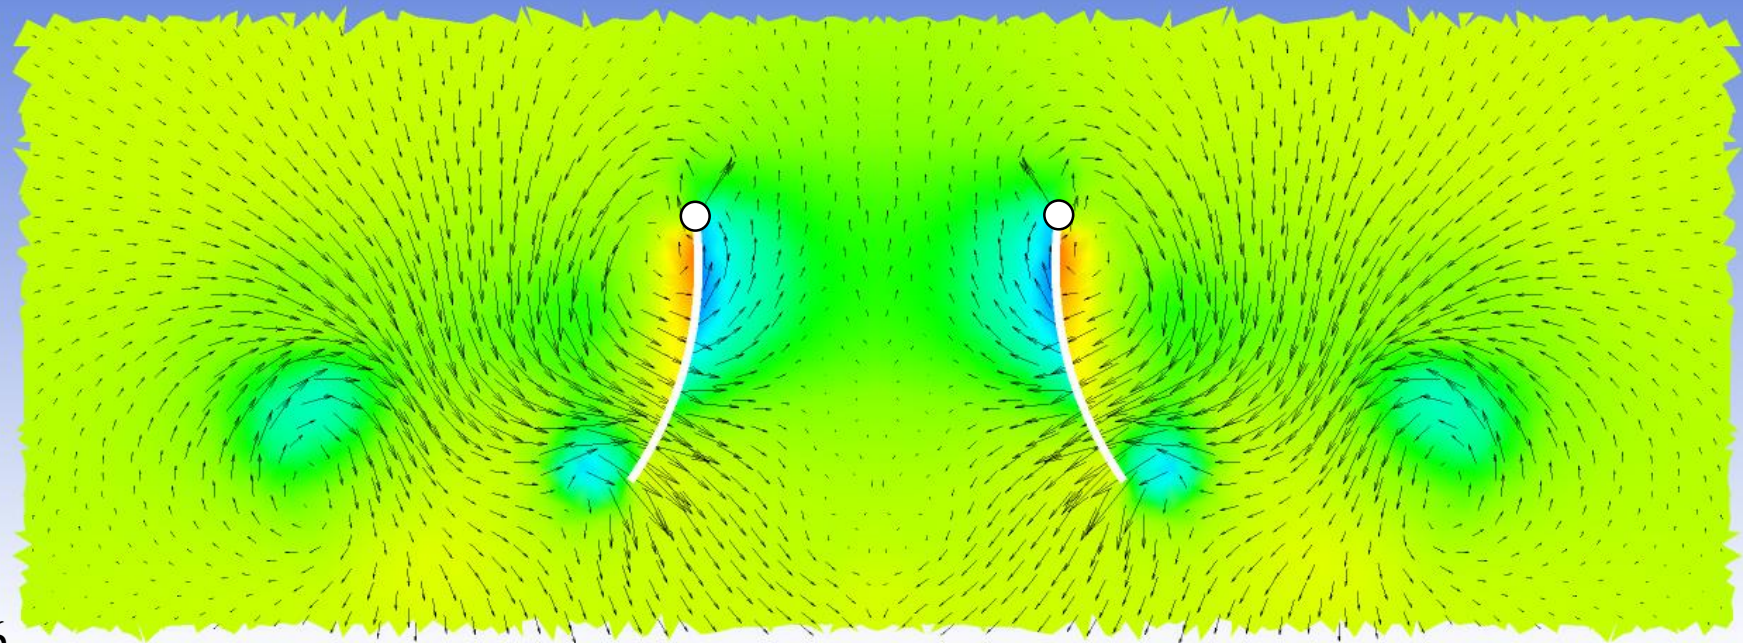

ANSYS  
R16.2  
Academic

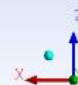

$t/T=0.26$



16mm

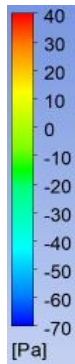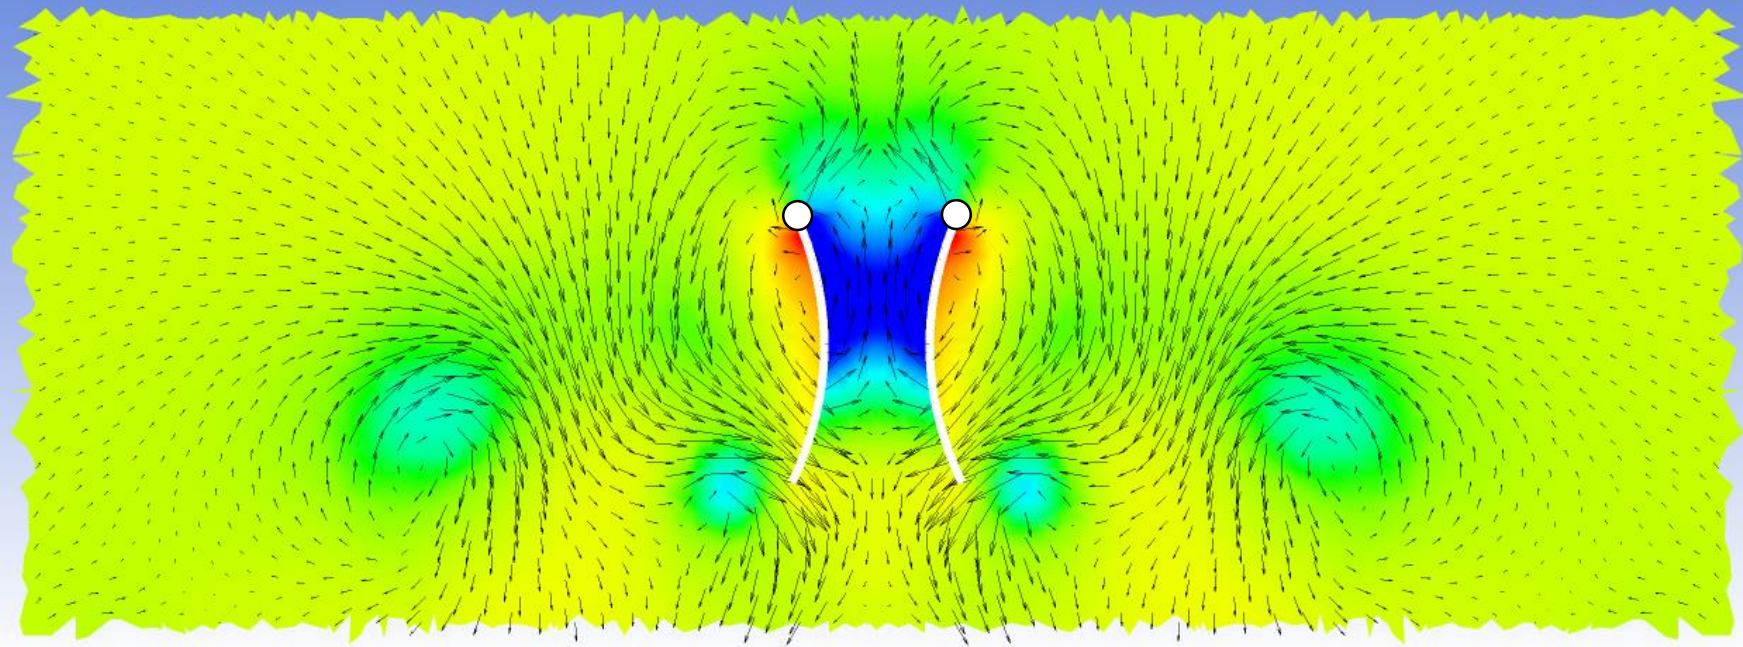

ANSYS  
R16.2  
Academic

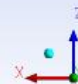

40mm

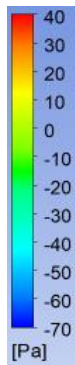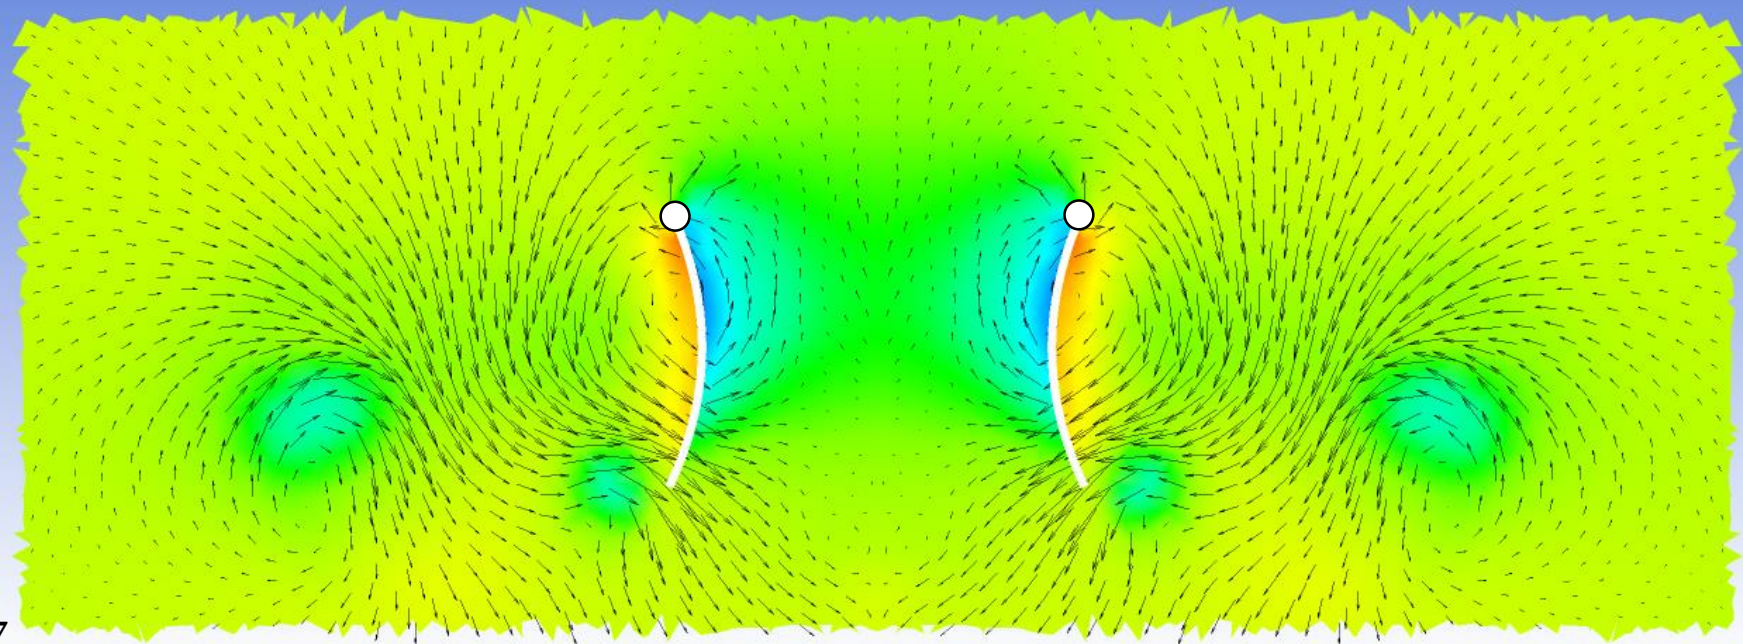

ANSYS  
R16.2  
Academic



$t/T=0.27$



16mm

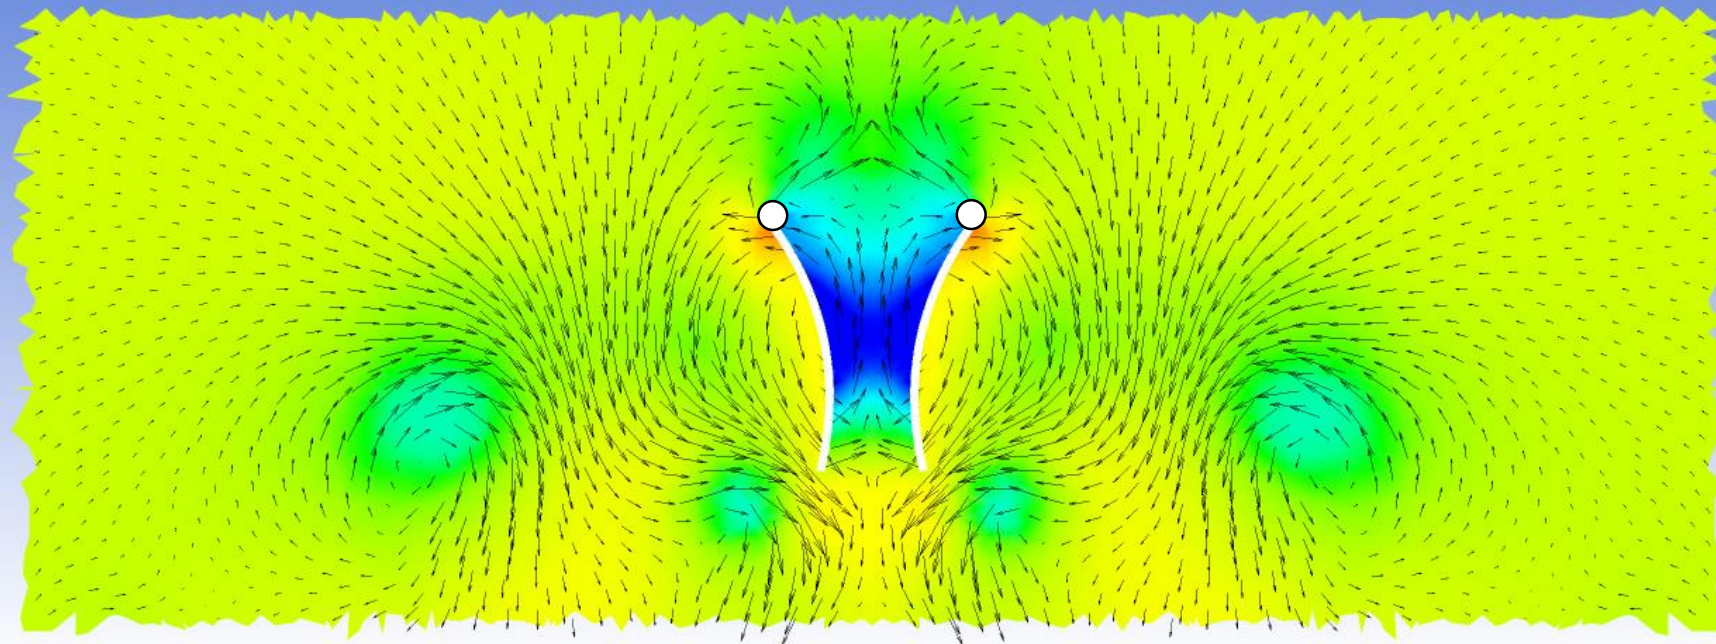

ANSYS  
R16.2  
Academic



40mm

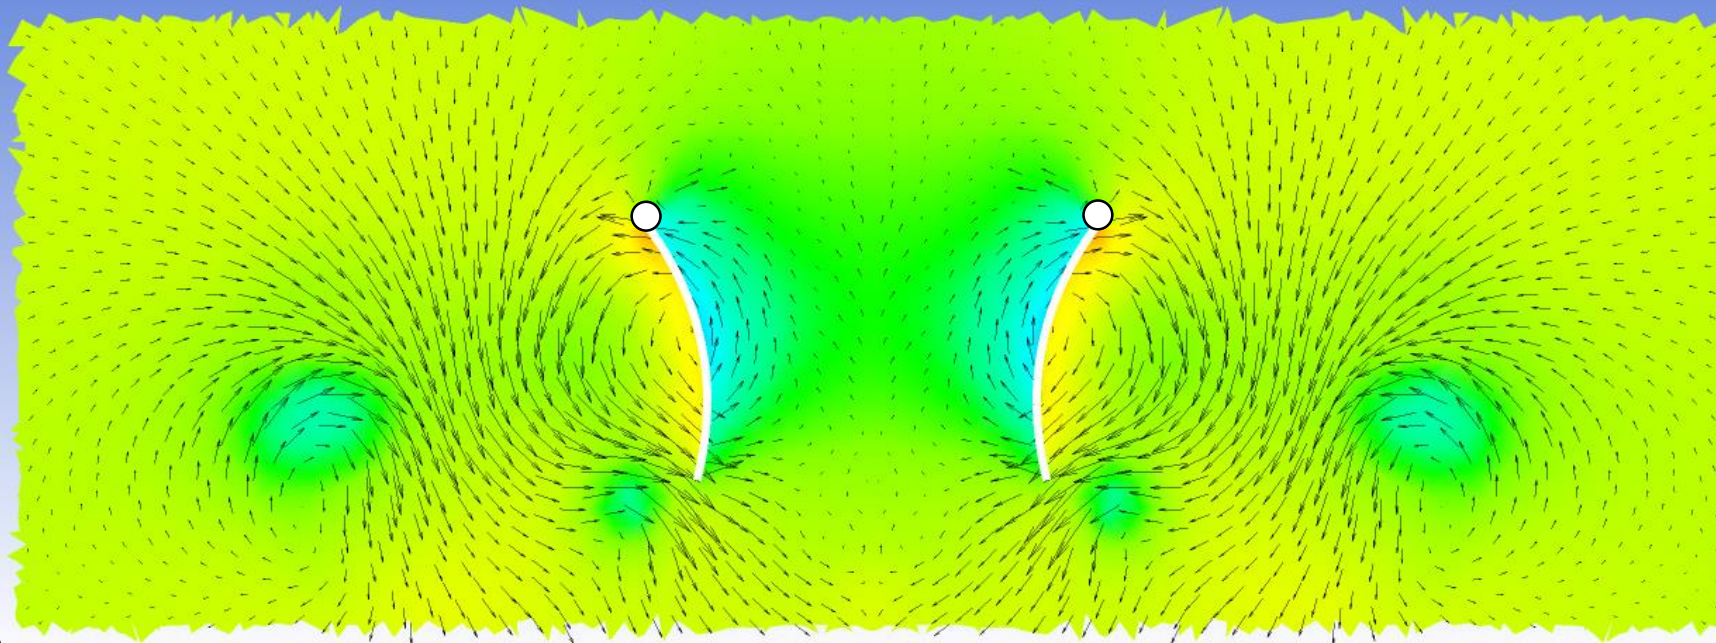

ANSYS  
R16.2  
Academic



$t/T=0.28$



16mm

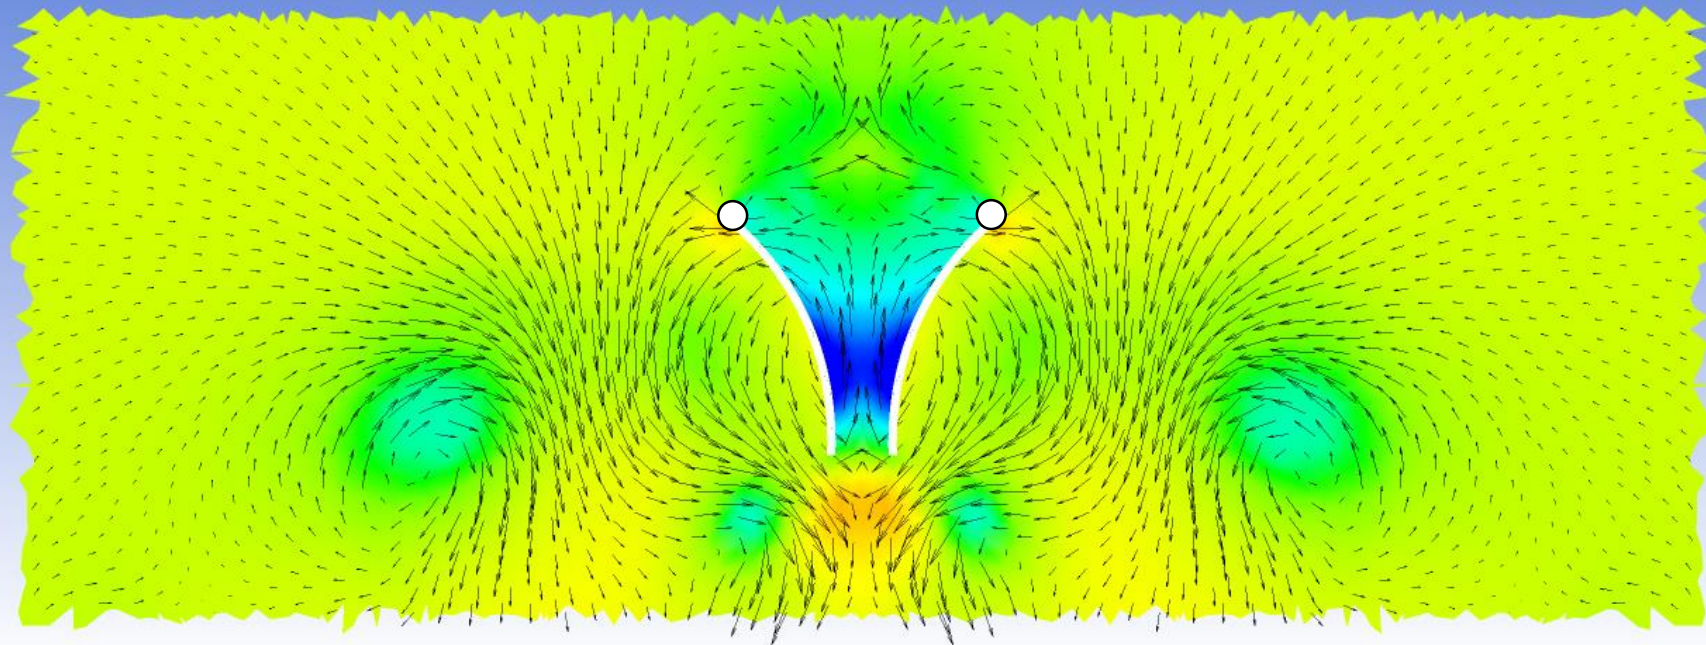

ANSYS  
R16.2  
Academic



40mm

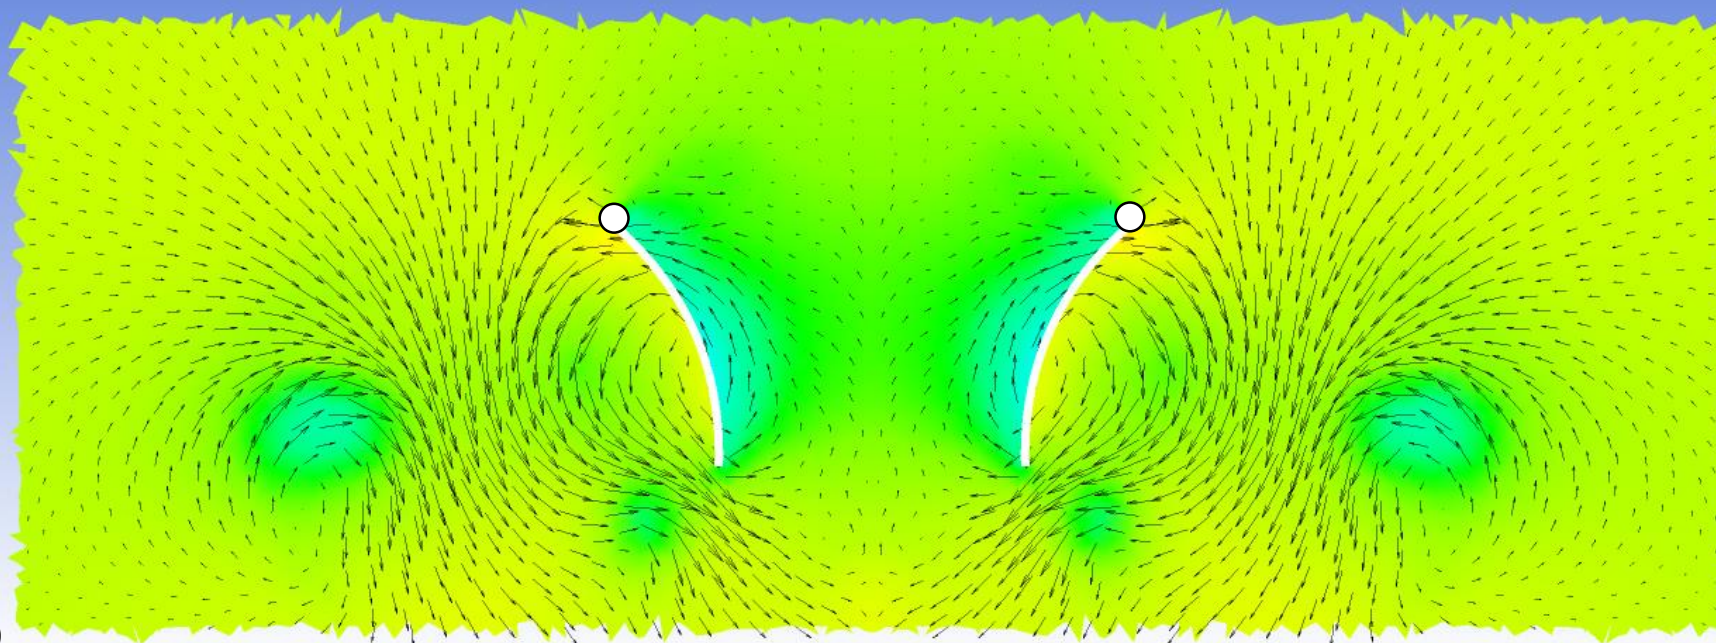

ANSYS  
R16.2  
Academic



$t/T=0.29$



16mm

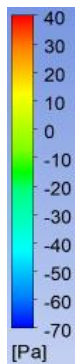

[Pa]

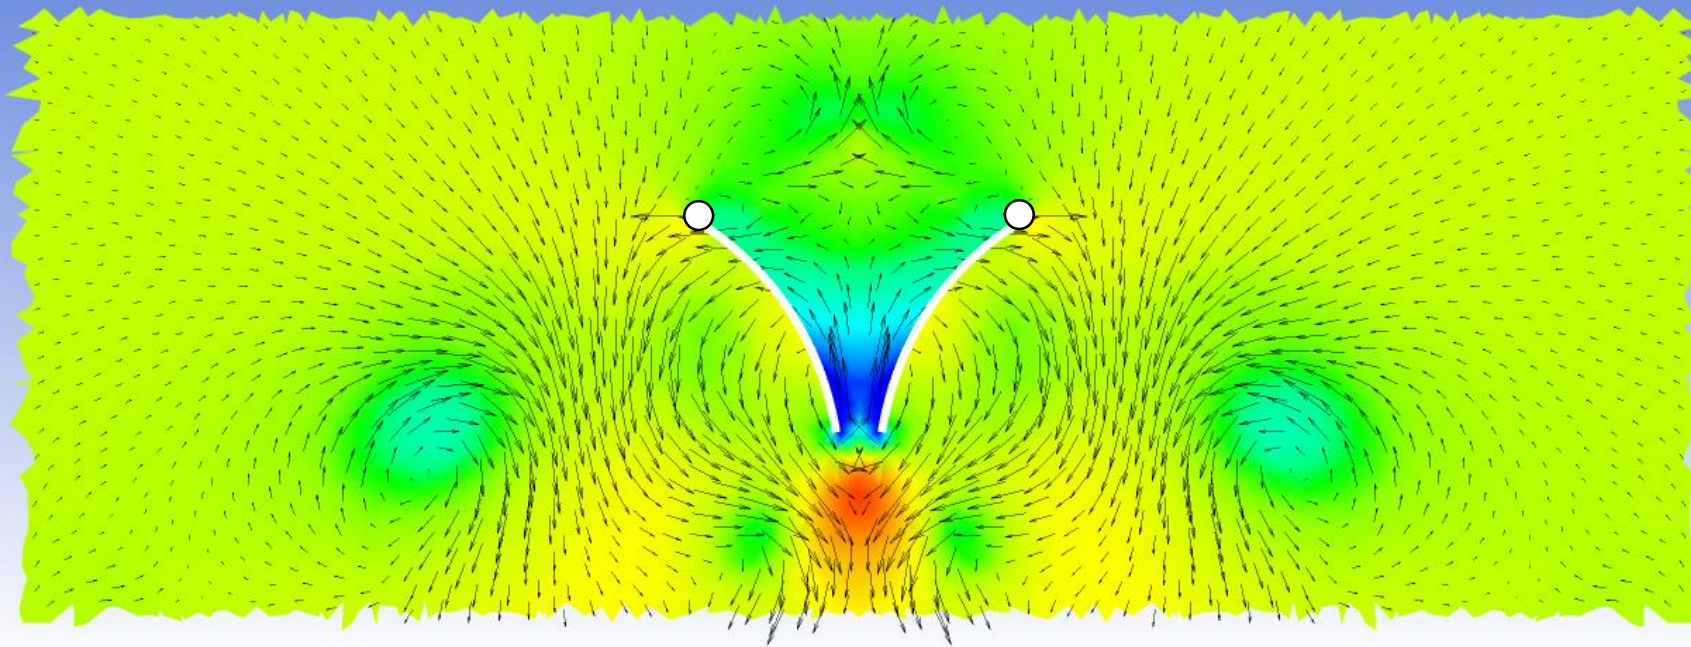

ANSYS  
R16.2  
Academic

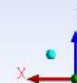

40mm

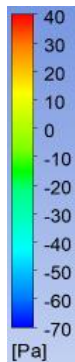

[Pa]

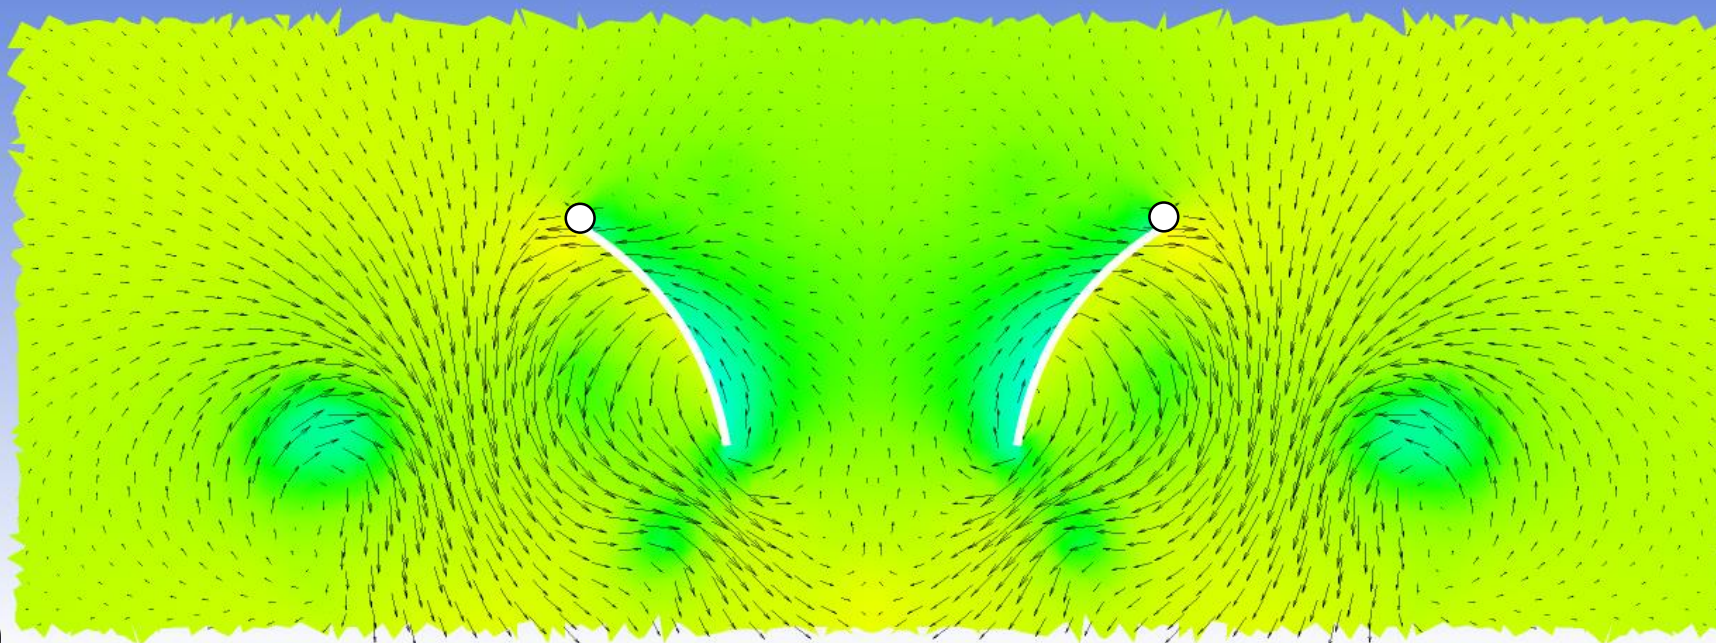

ANSYS  
R16.2  
Academic

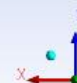

$t/T=0.30$



16mm

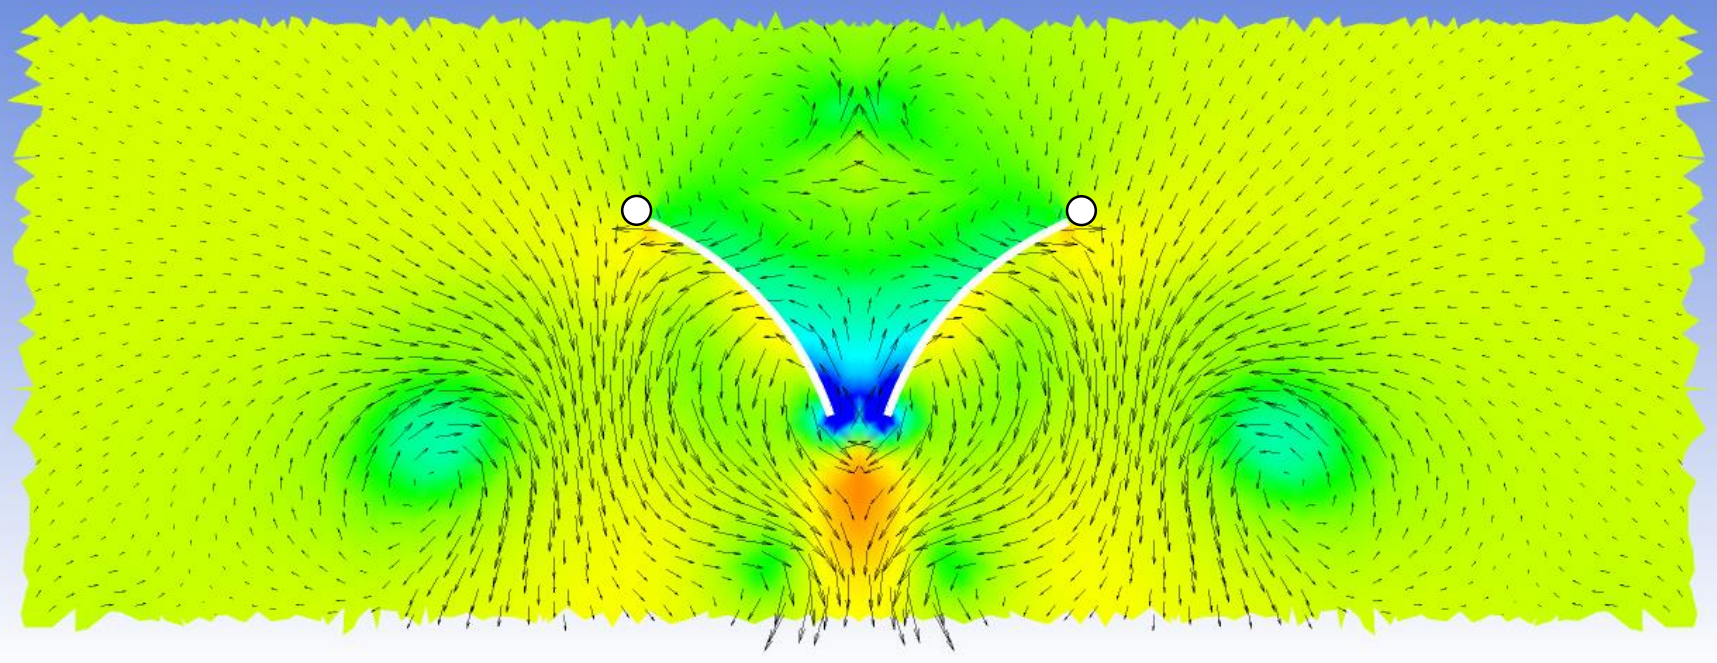

40mm

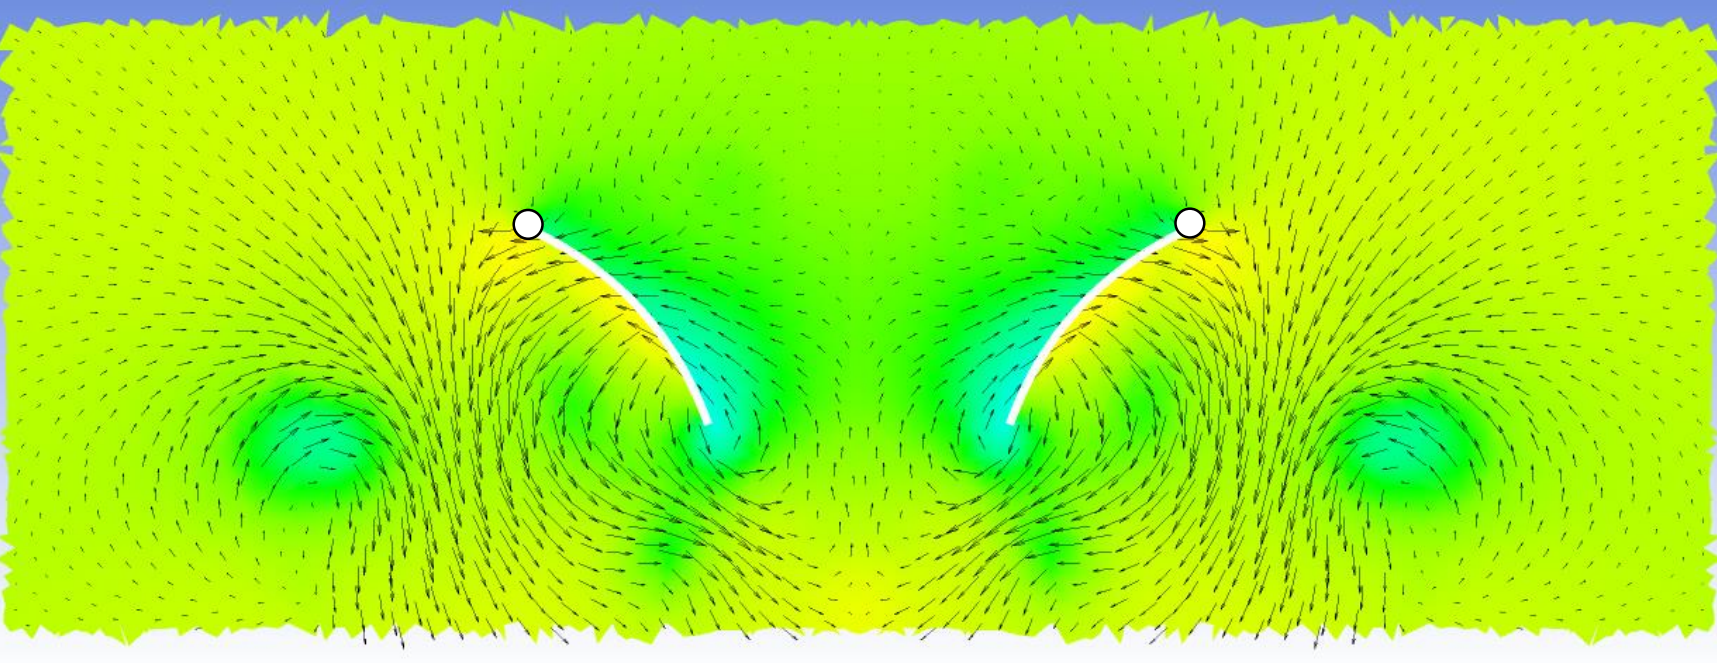

$t/T=0.31$



16mm

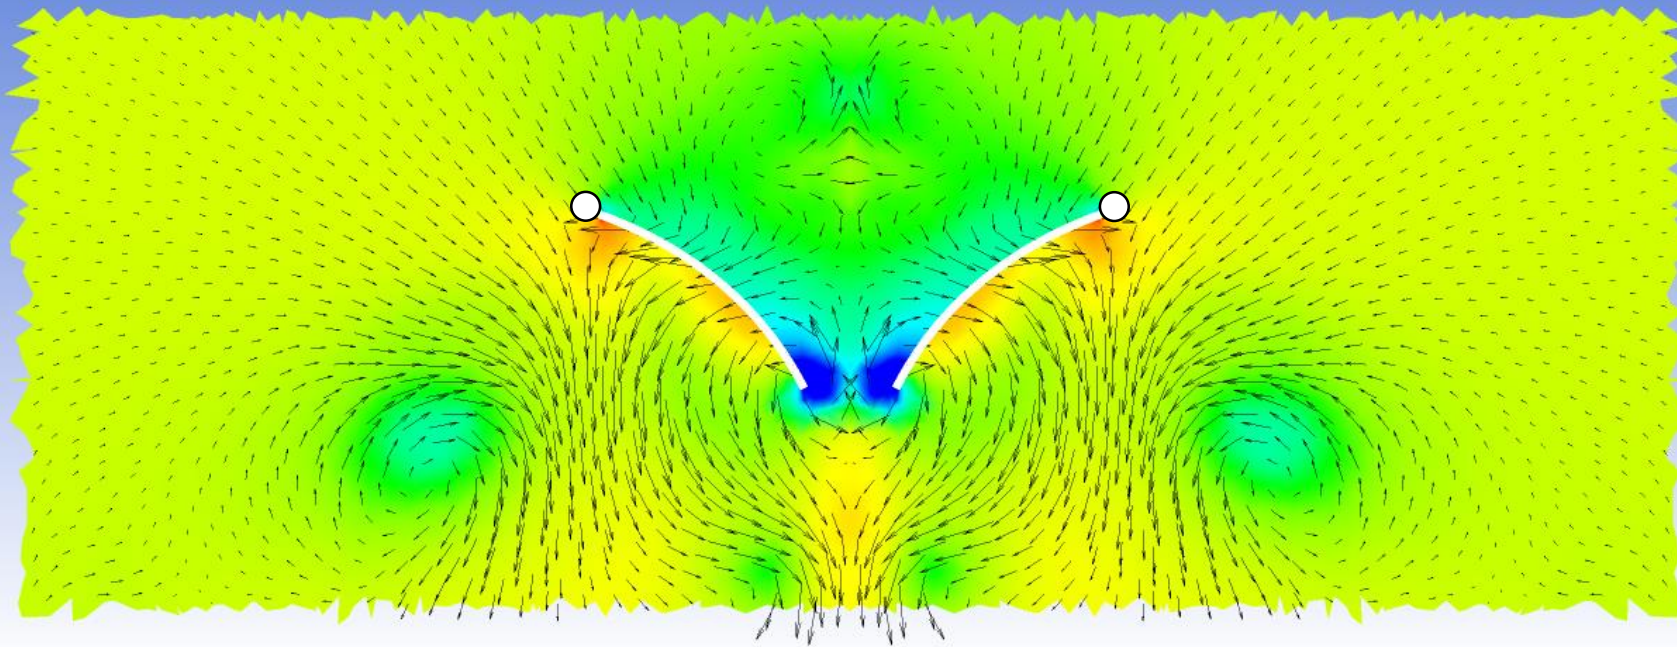

ANSYS  
R16.2  
Academic



40mm

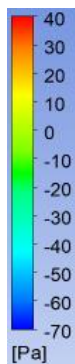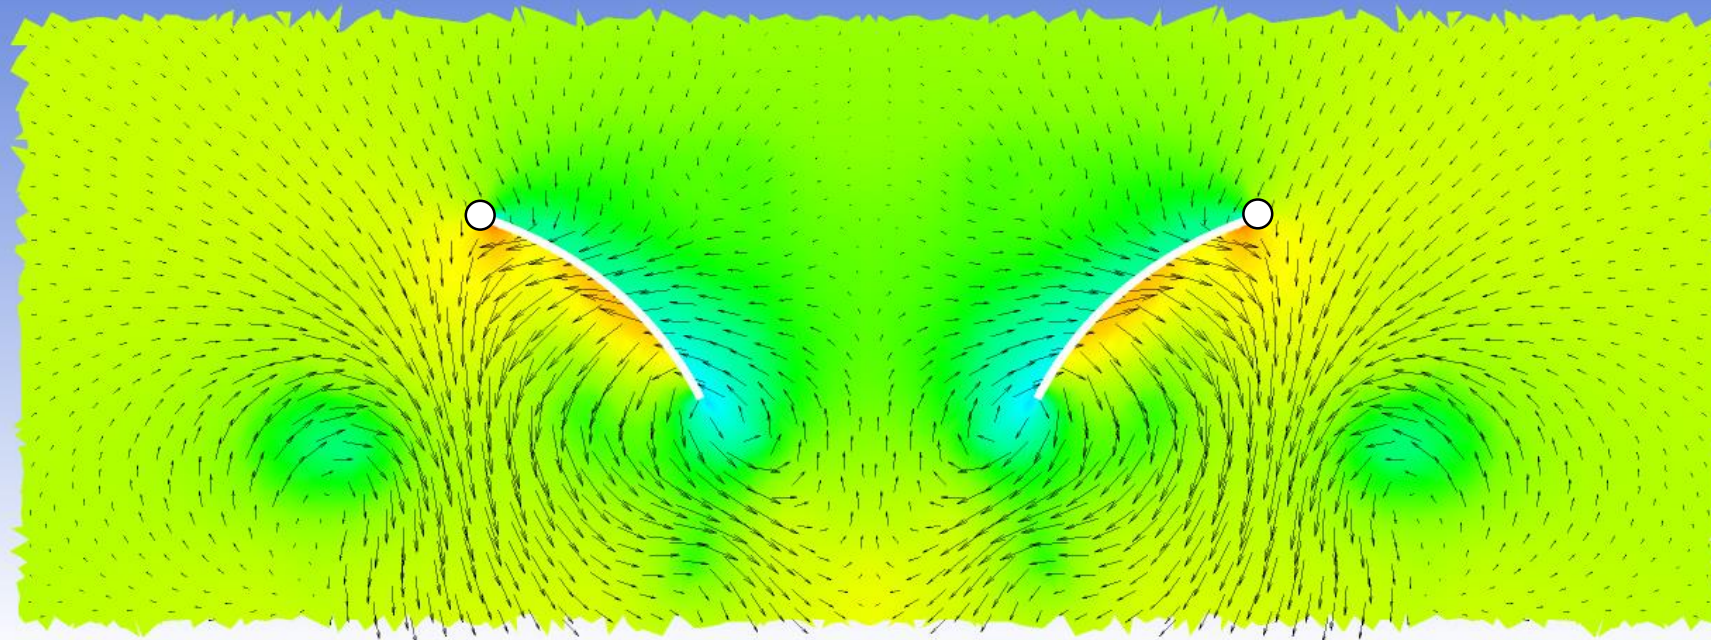

ANSYS  
R16.2  
Academic



$t/T=0.32$
