# Supplementary material for: Clap-and-Fling Mechanism in Non-Zero Inflow of a Tailless Two-Winged Flapping-Wing Micro Air Vehicle
Source: MDPI journal article supplement (doi:10.3390/aerospace9020108), 2022-02-16
Supplement: s1 [file s1]

Figure S2: Flow fields in 75% $R$ -plane during down-stroke reversal for  $J = 0.5$ . The white curves are the intersections between the wings and the plane, representing wing sections. The leading edges are marked with white circles.

16mm

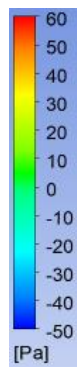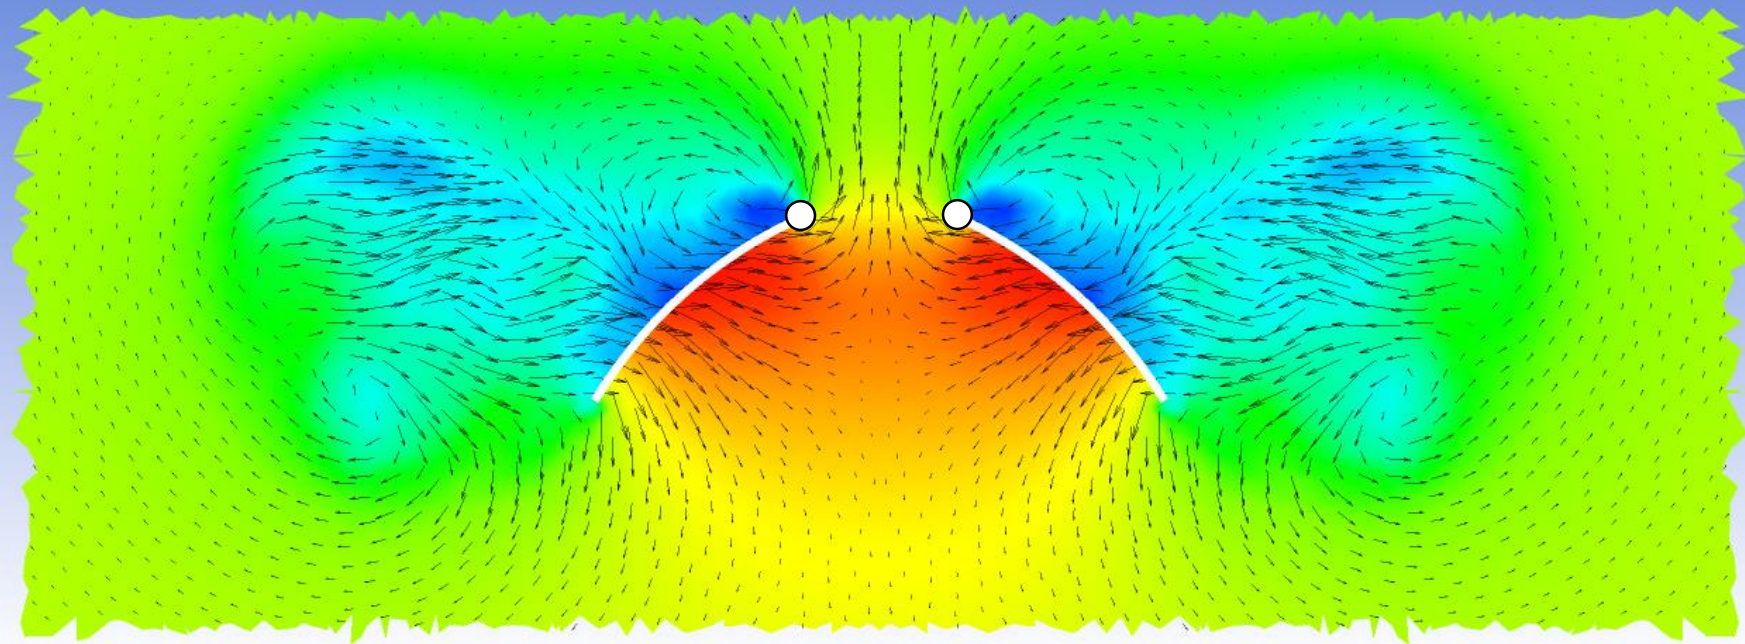

40mm

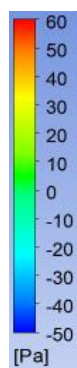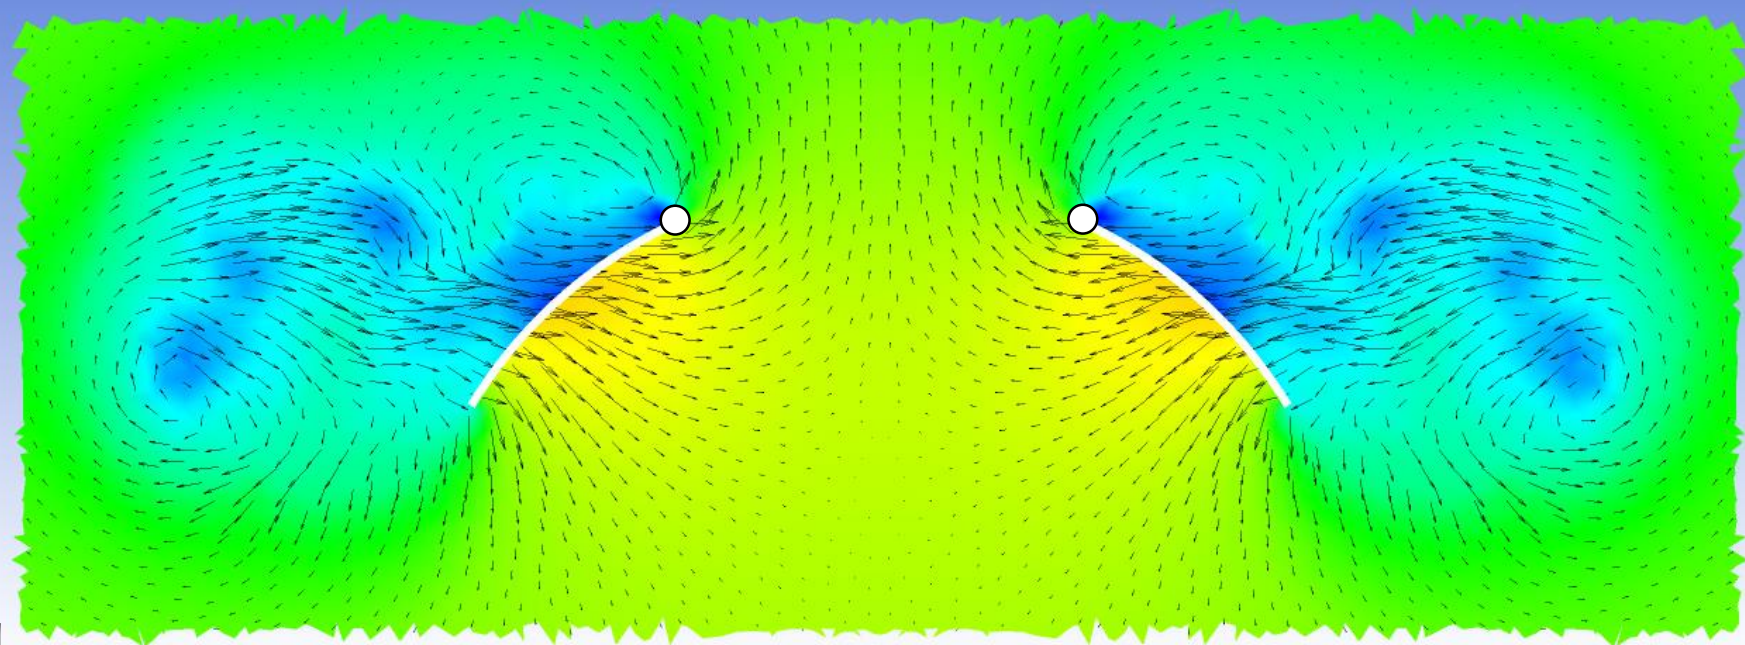

$t/T=0.21$



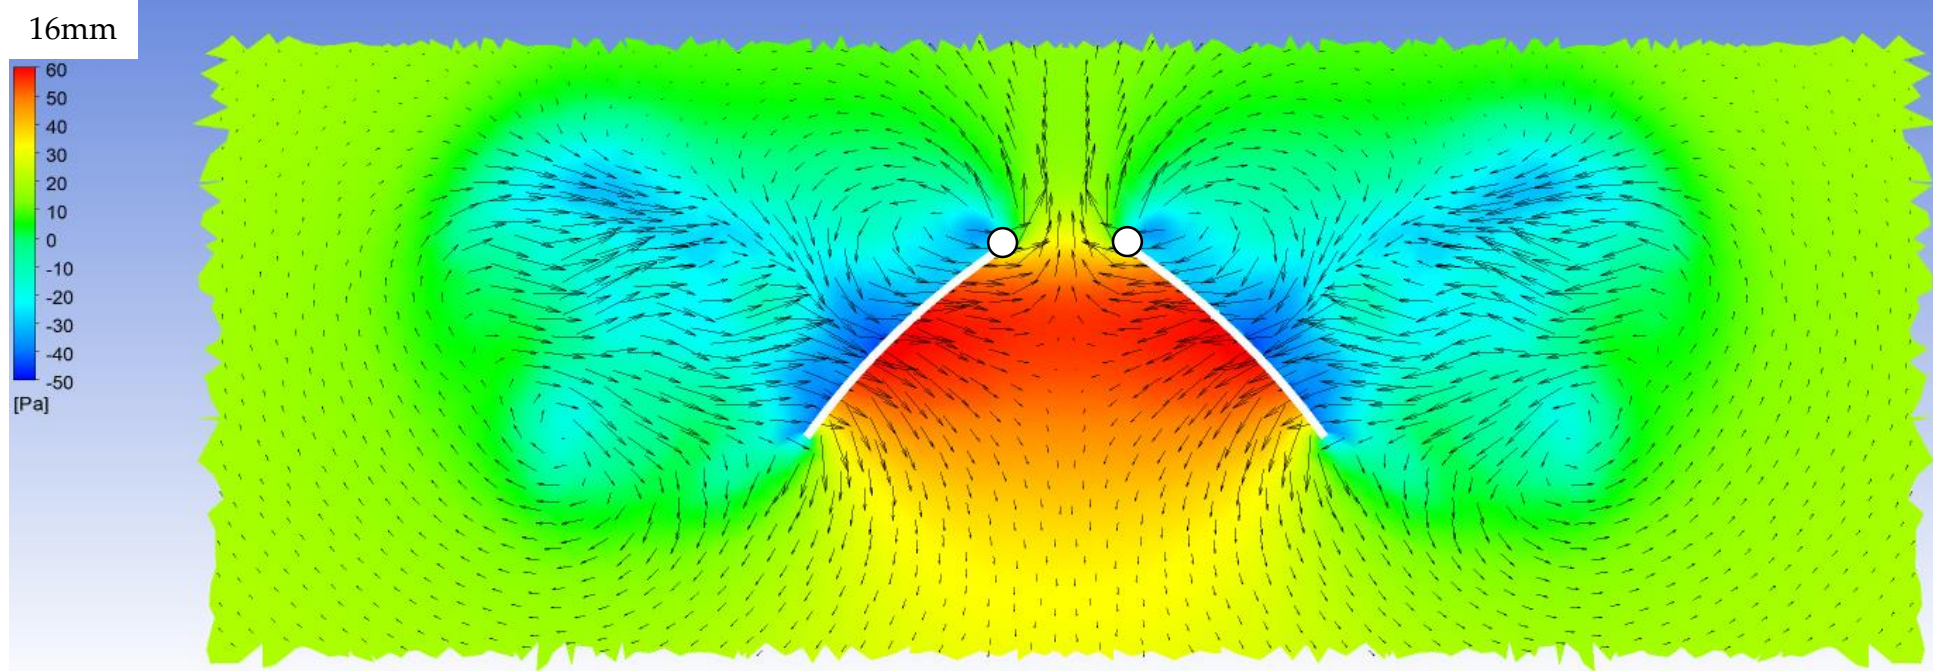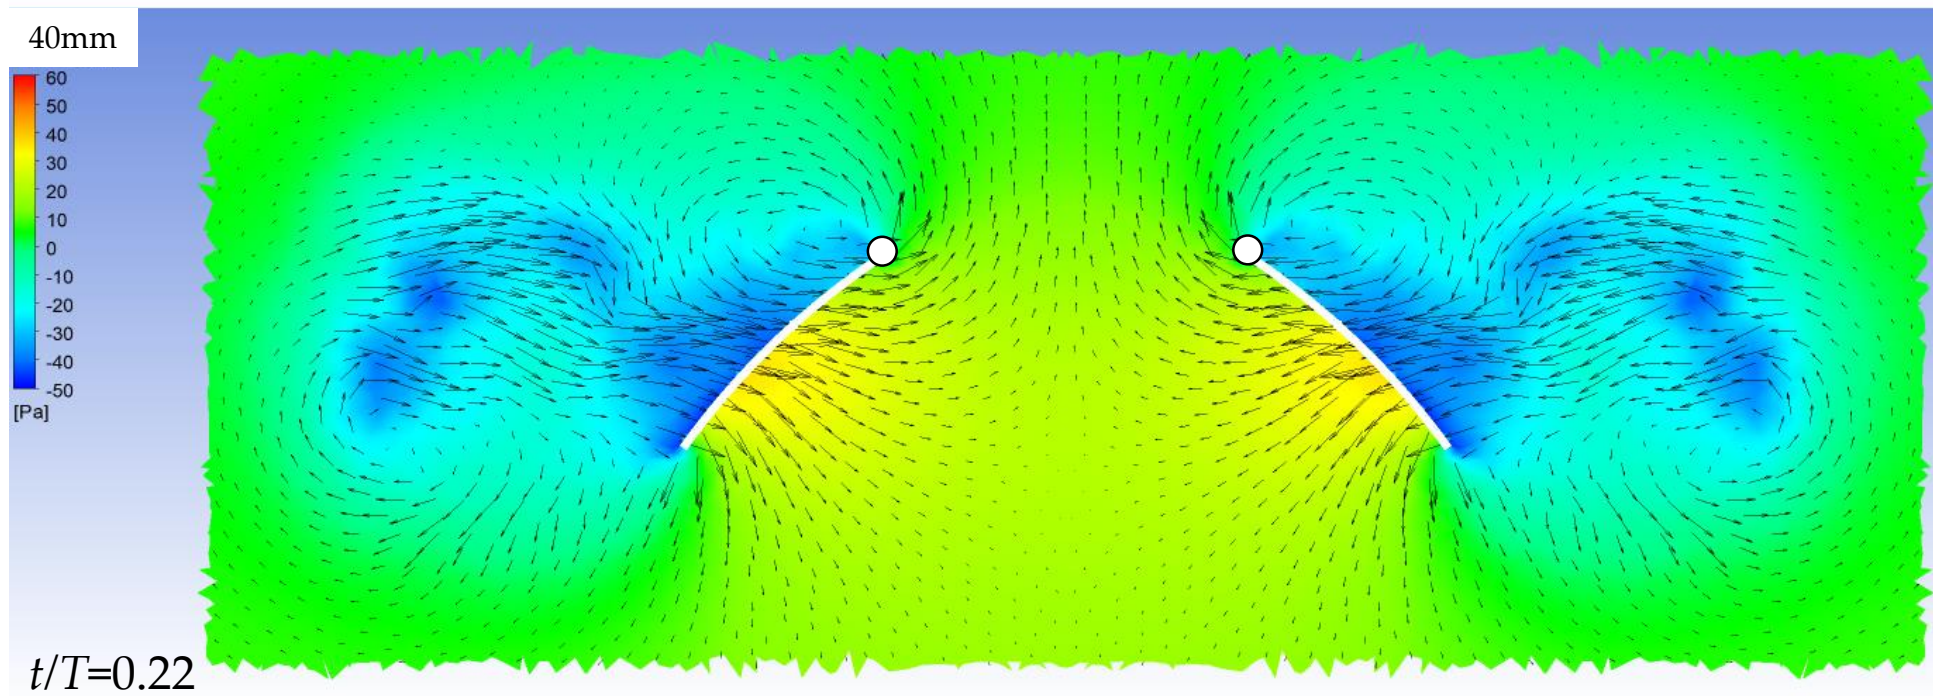



16mm

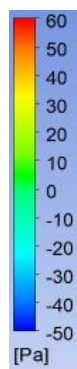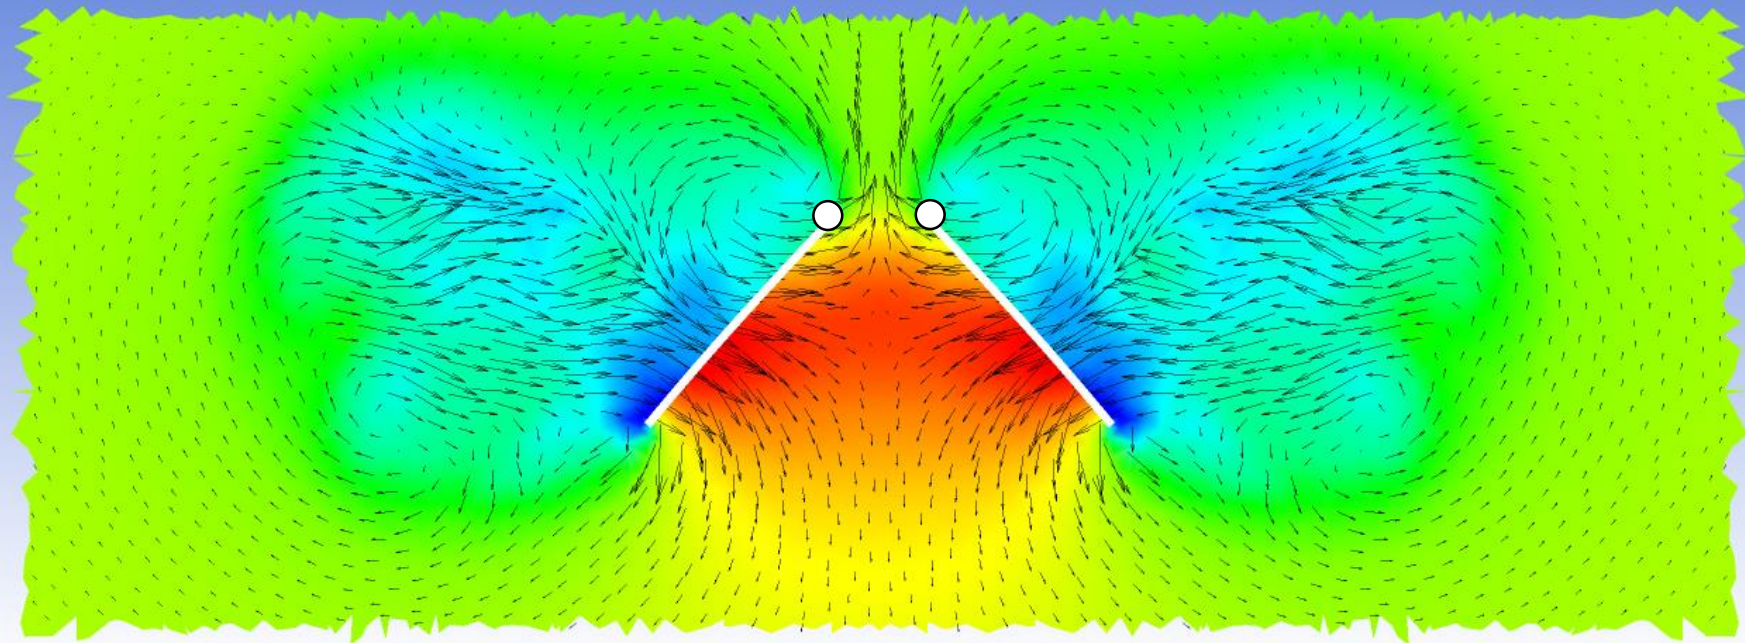

40mm

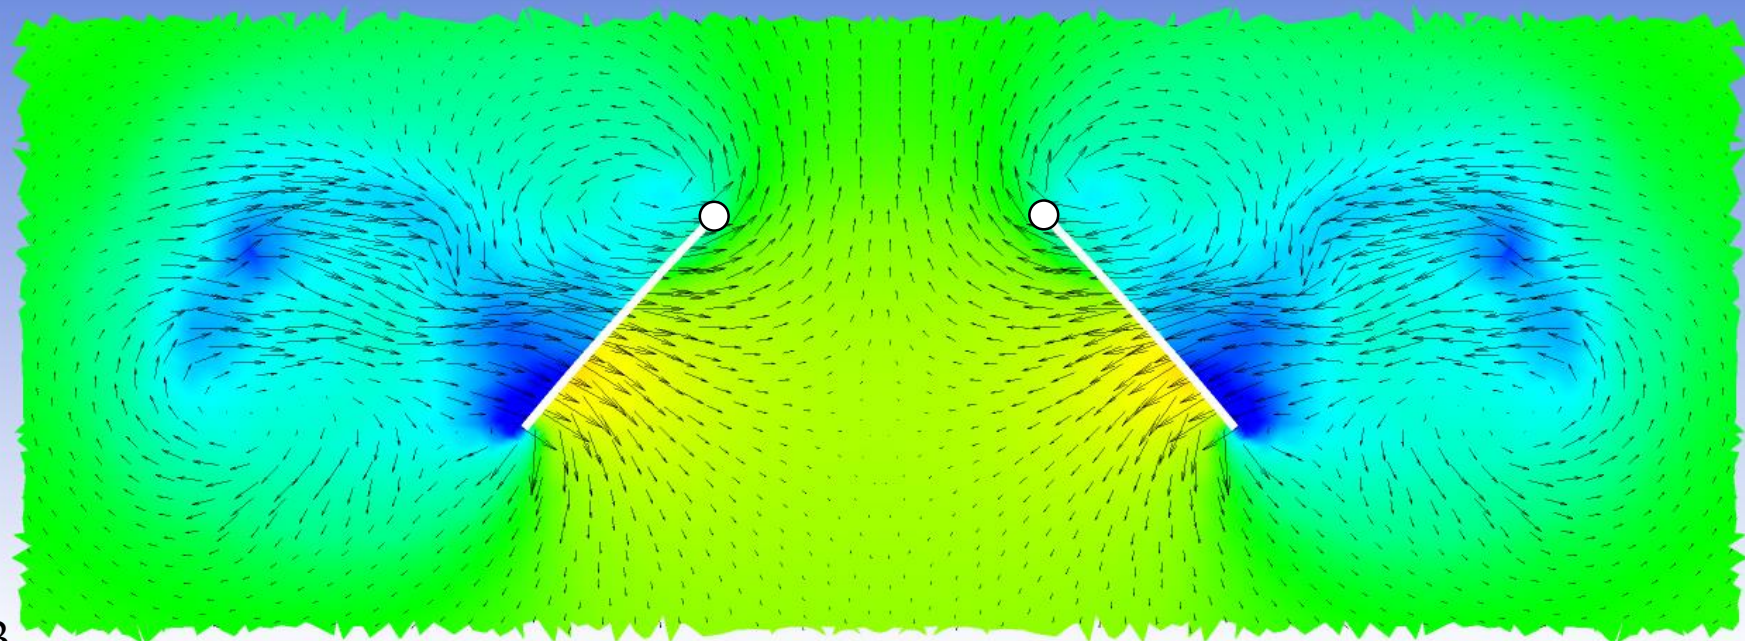

$t/T=0.23$



16mm

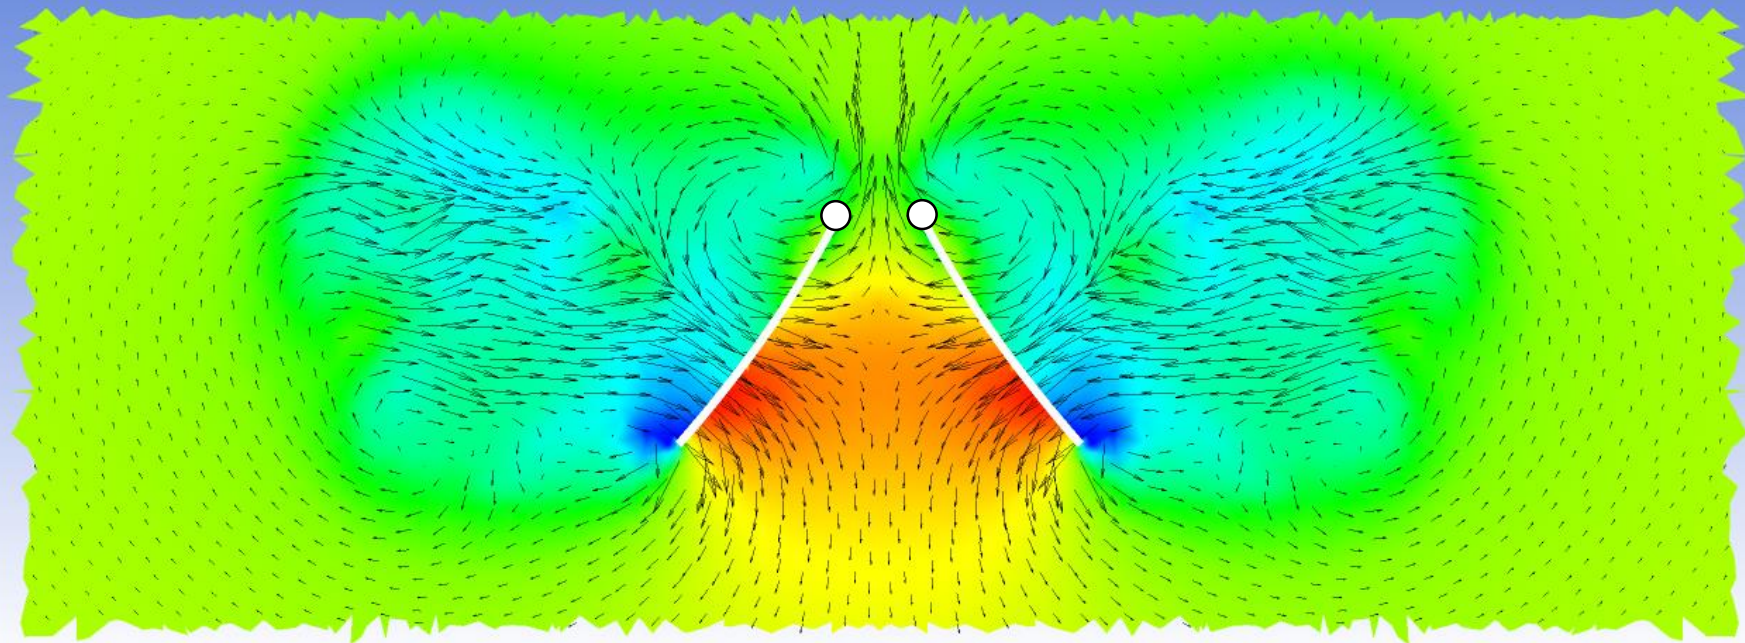

40mm

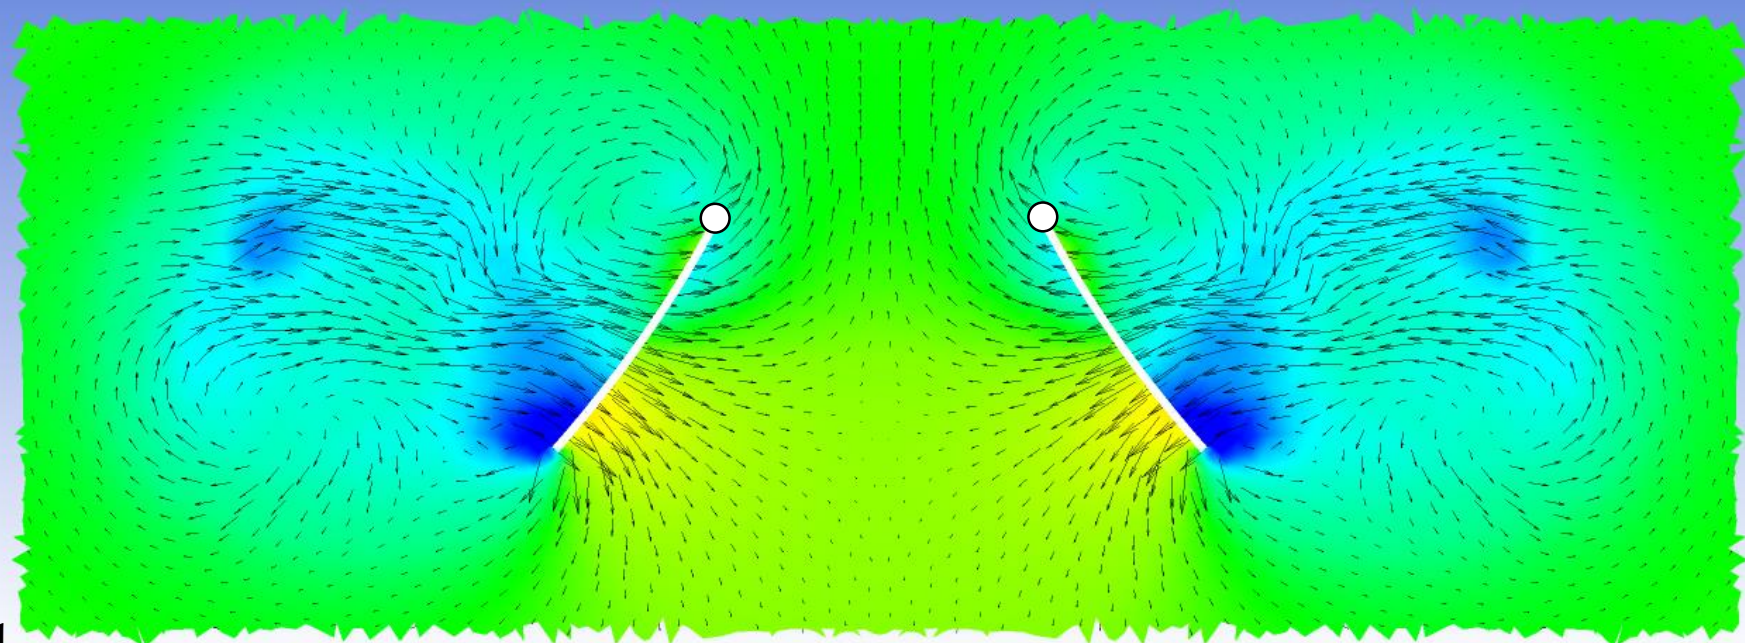

$t/T=0.24$



16mm

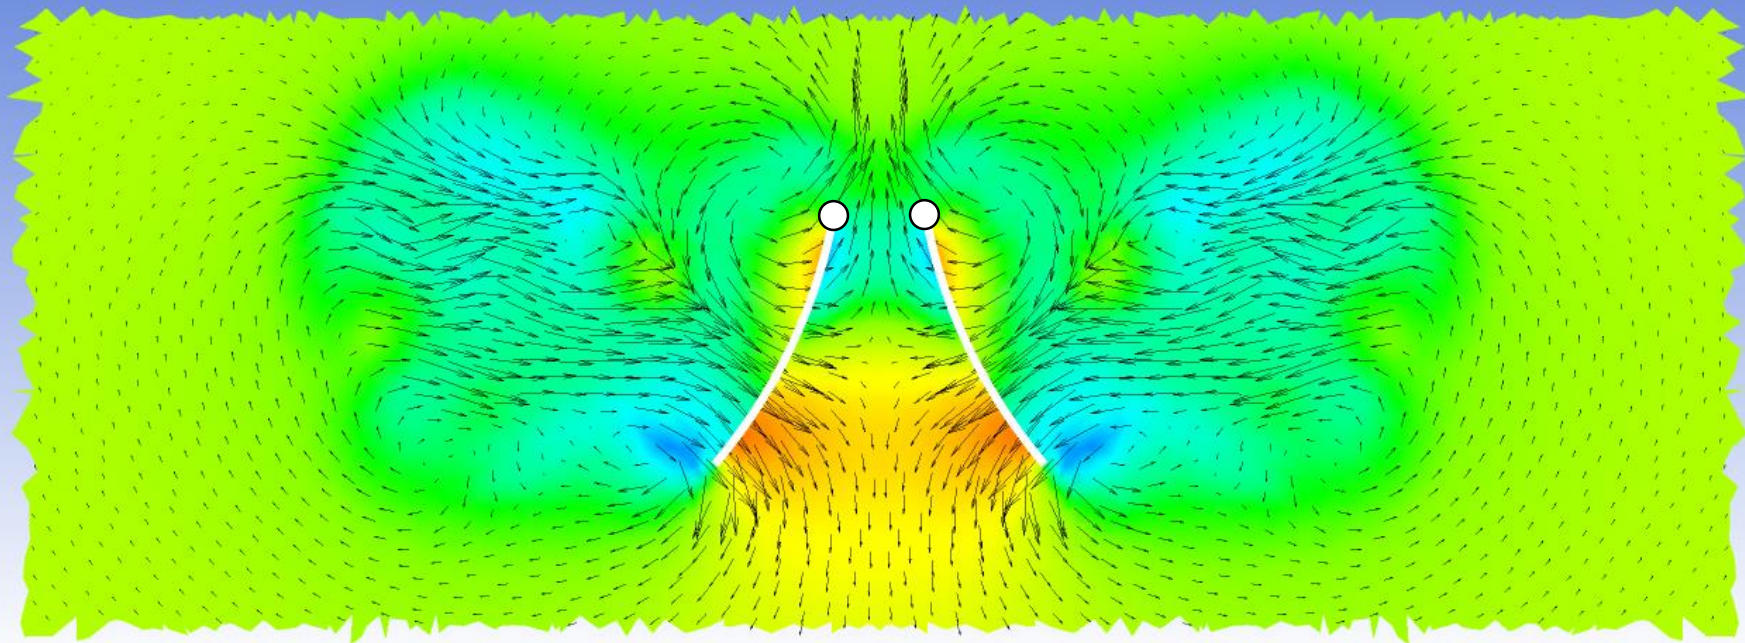

40mm

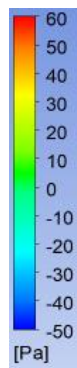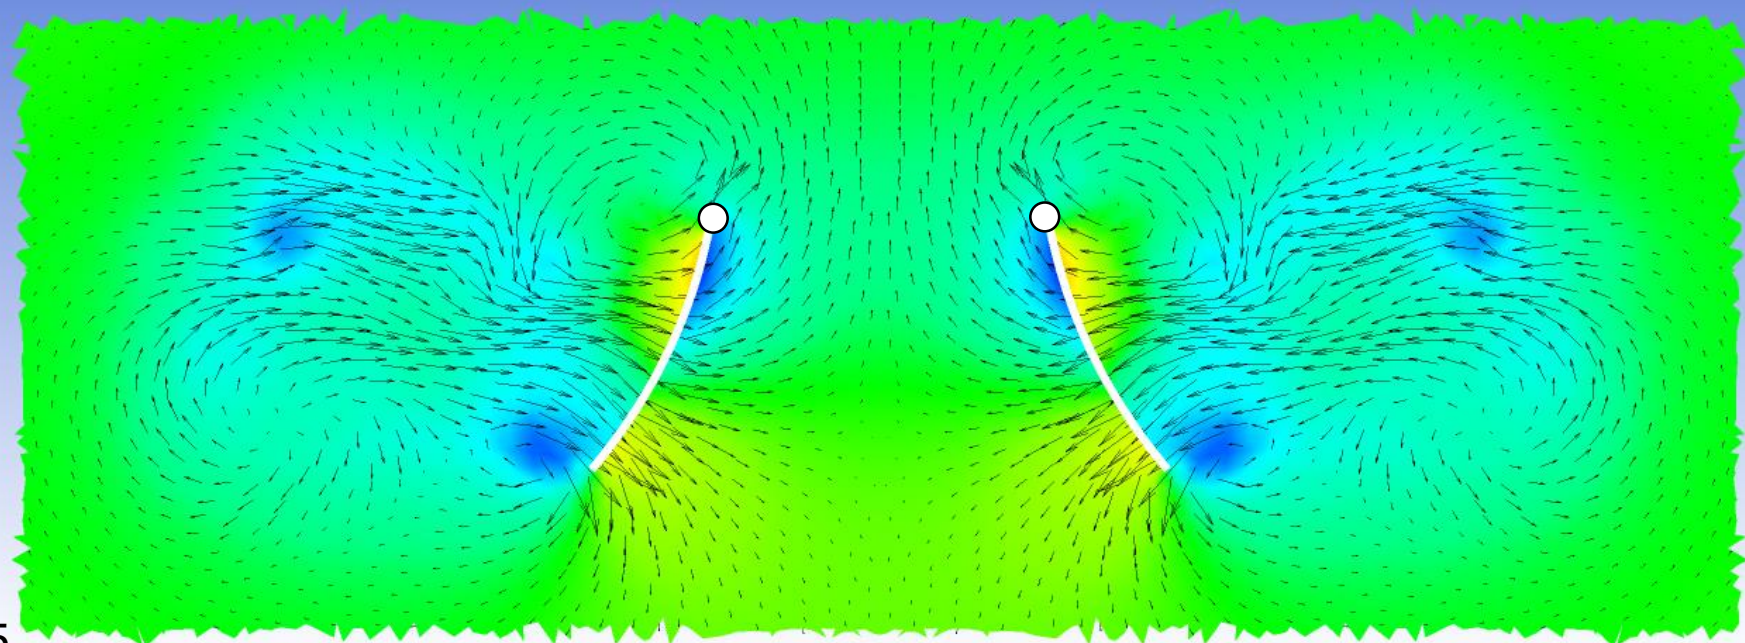

$t/T=0.25$



16mm

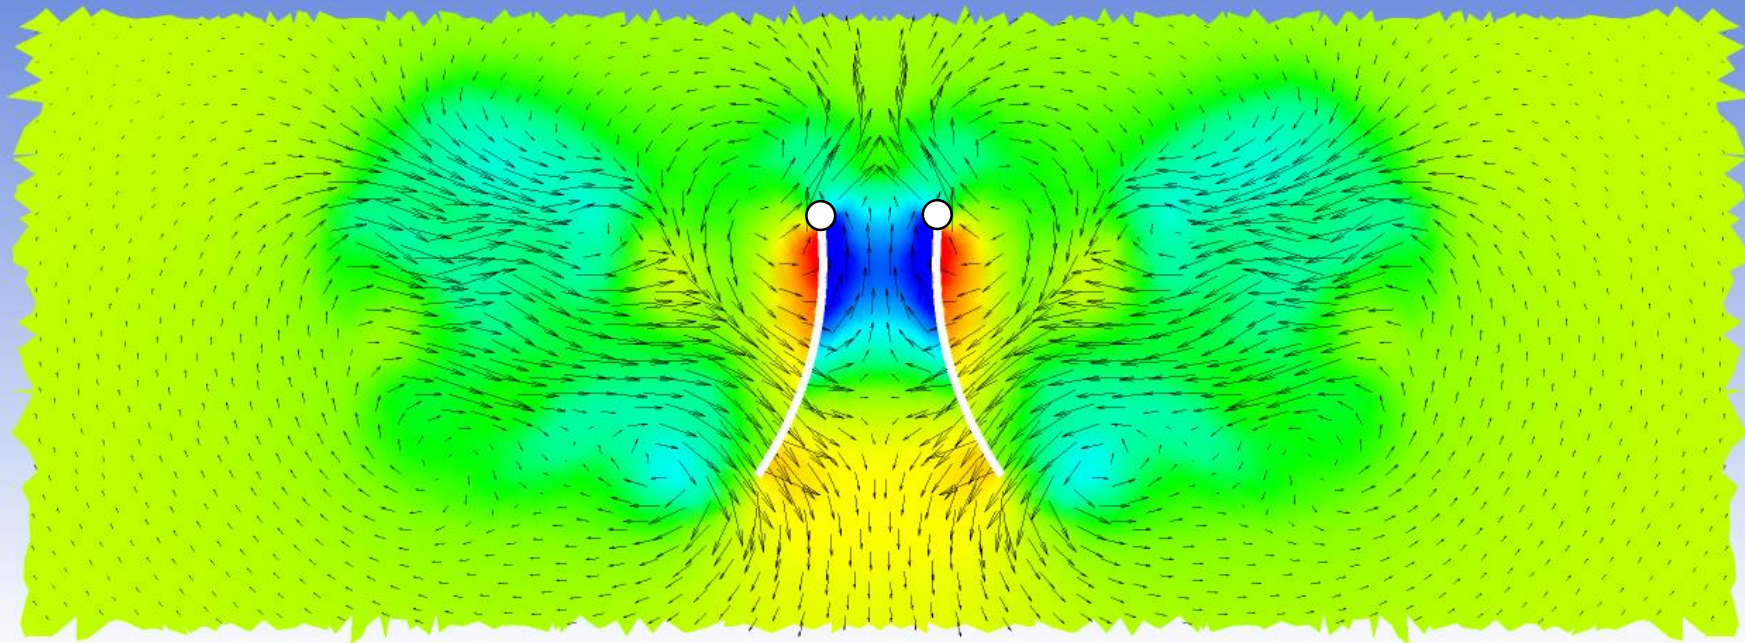

40mm

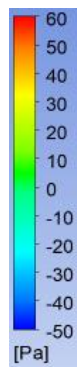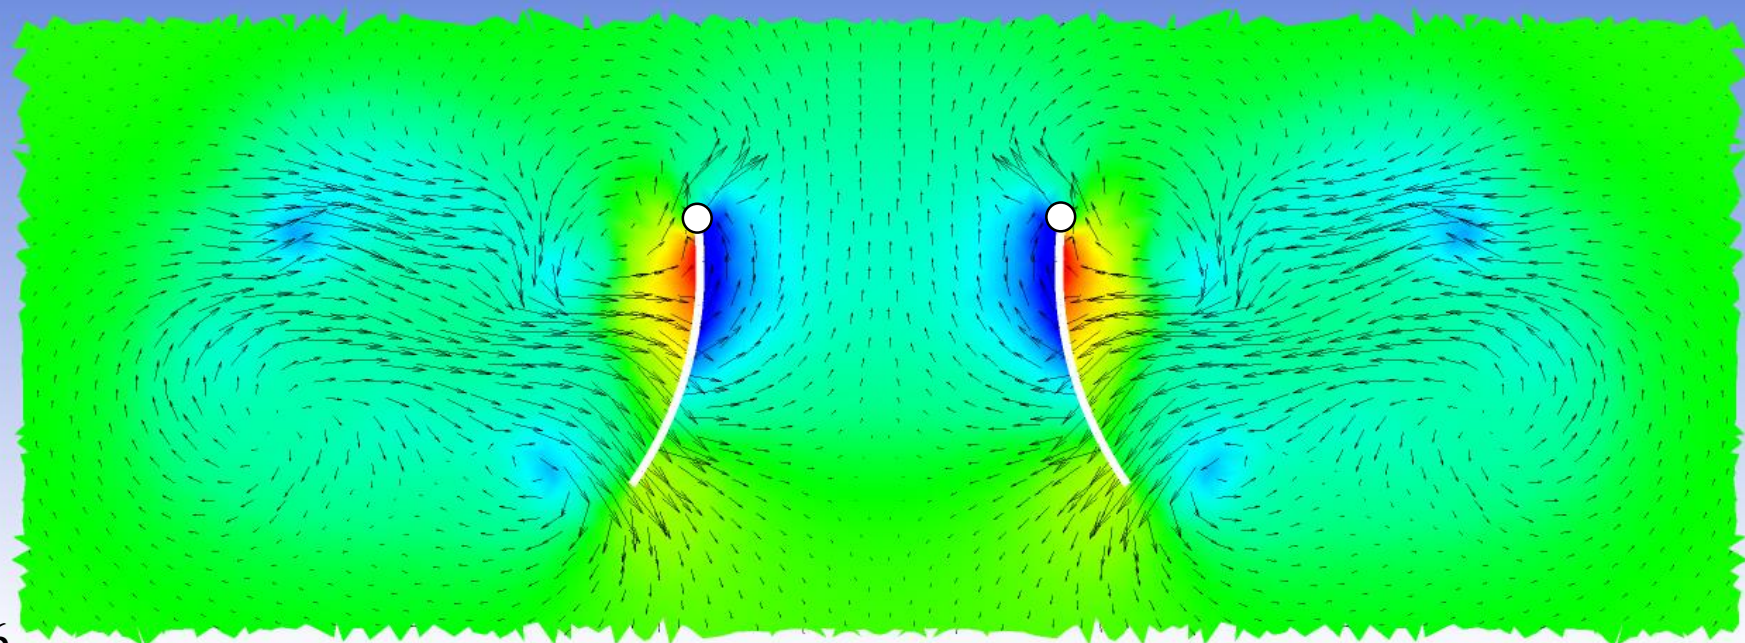

$t/T=0.26$



16mm

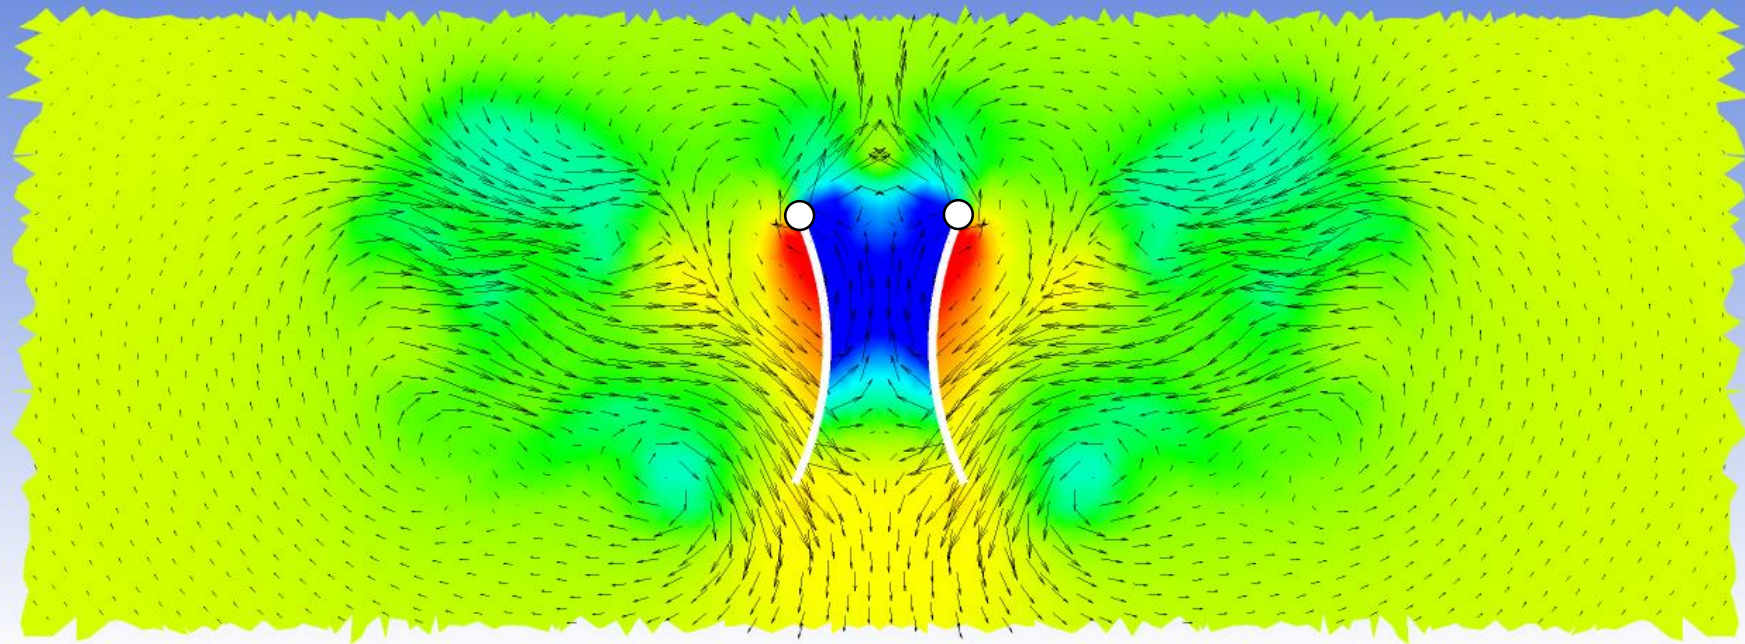

40mm

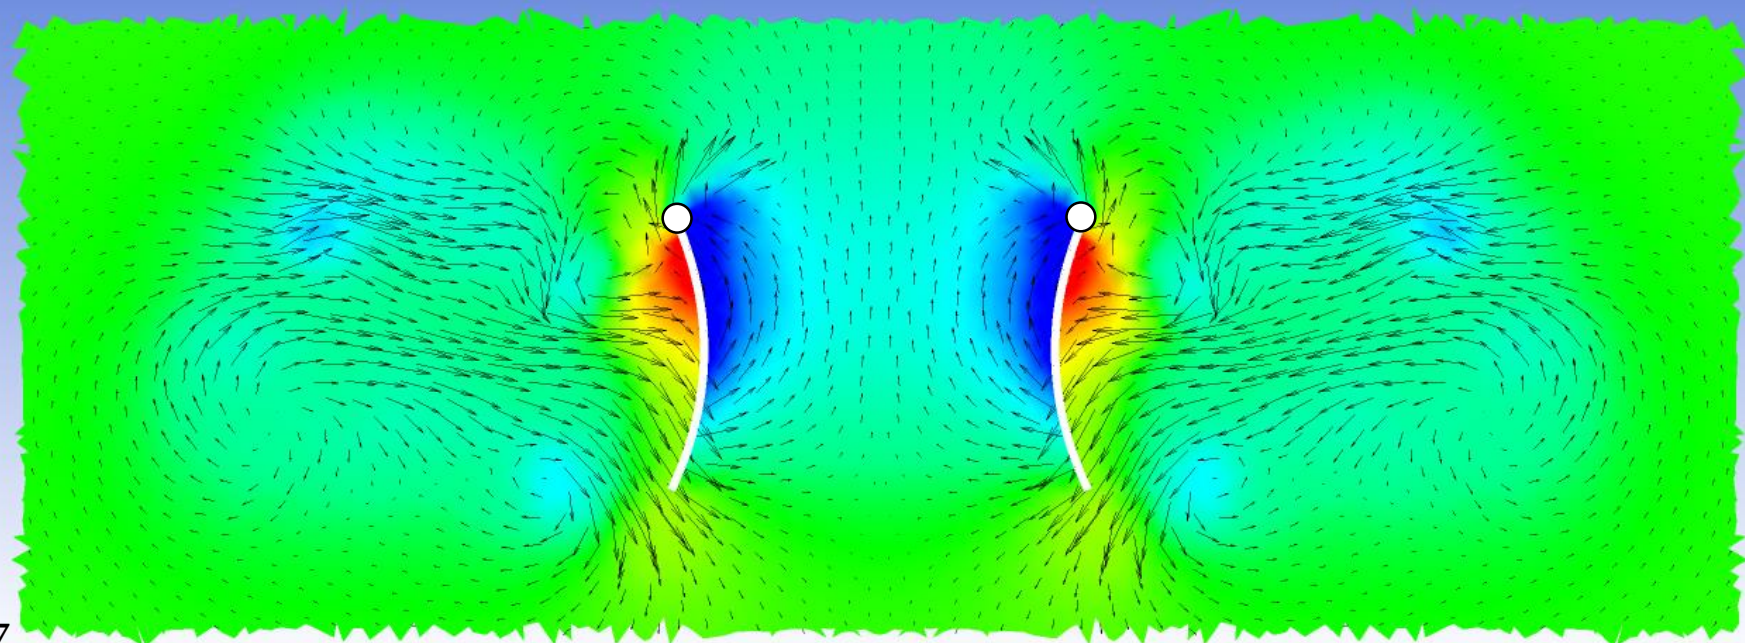

$t/T=0.27$



16mm

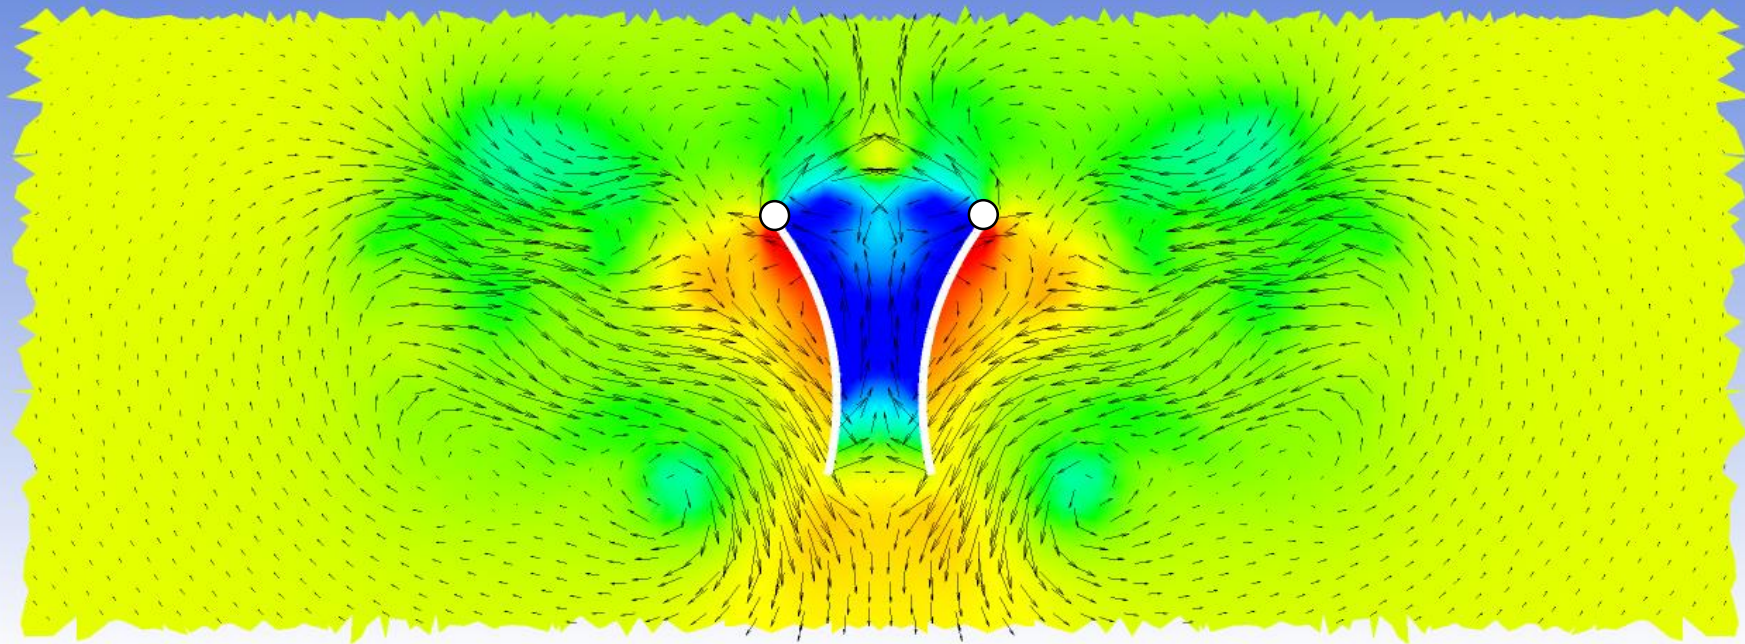

40mm

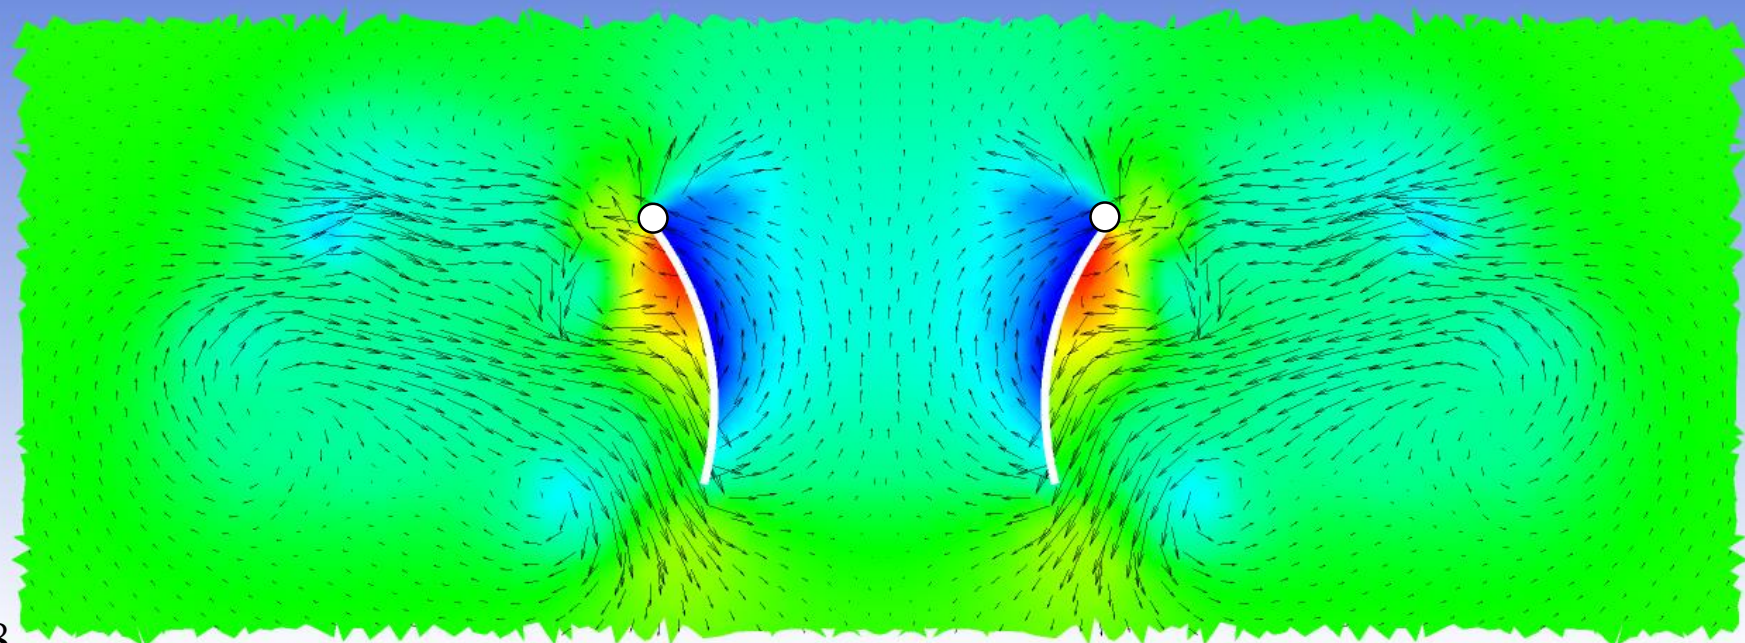

$t/T=0.28$



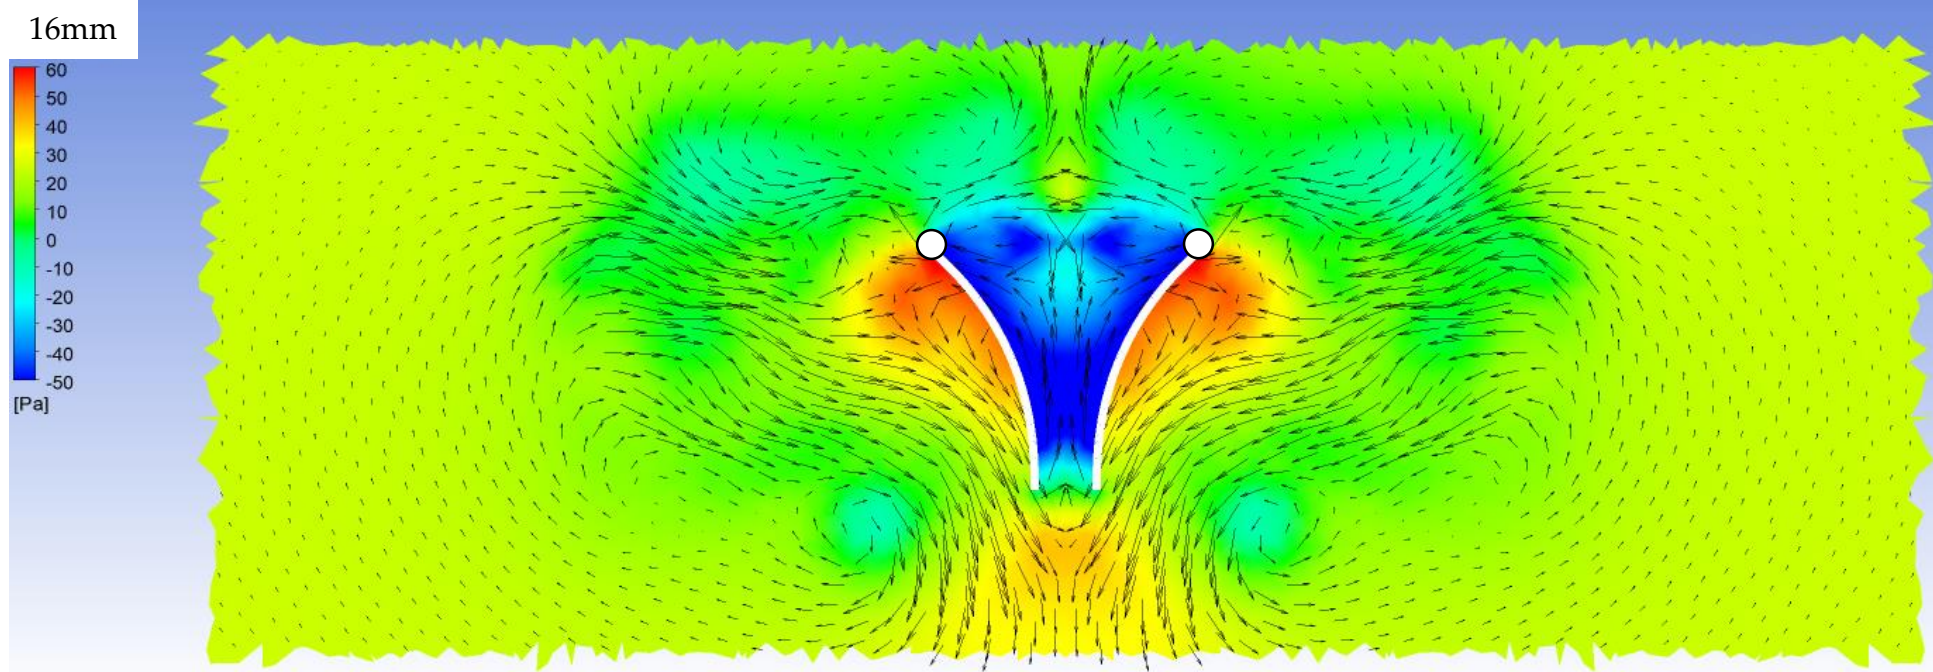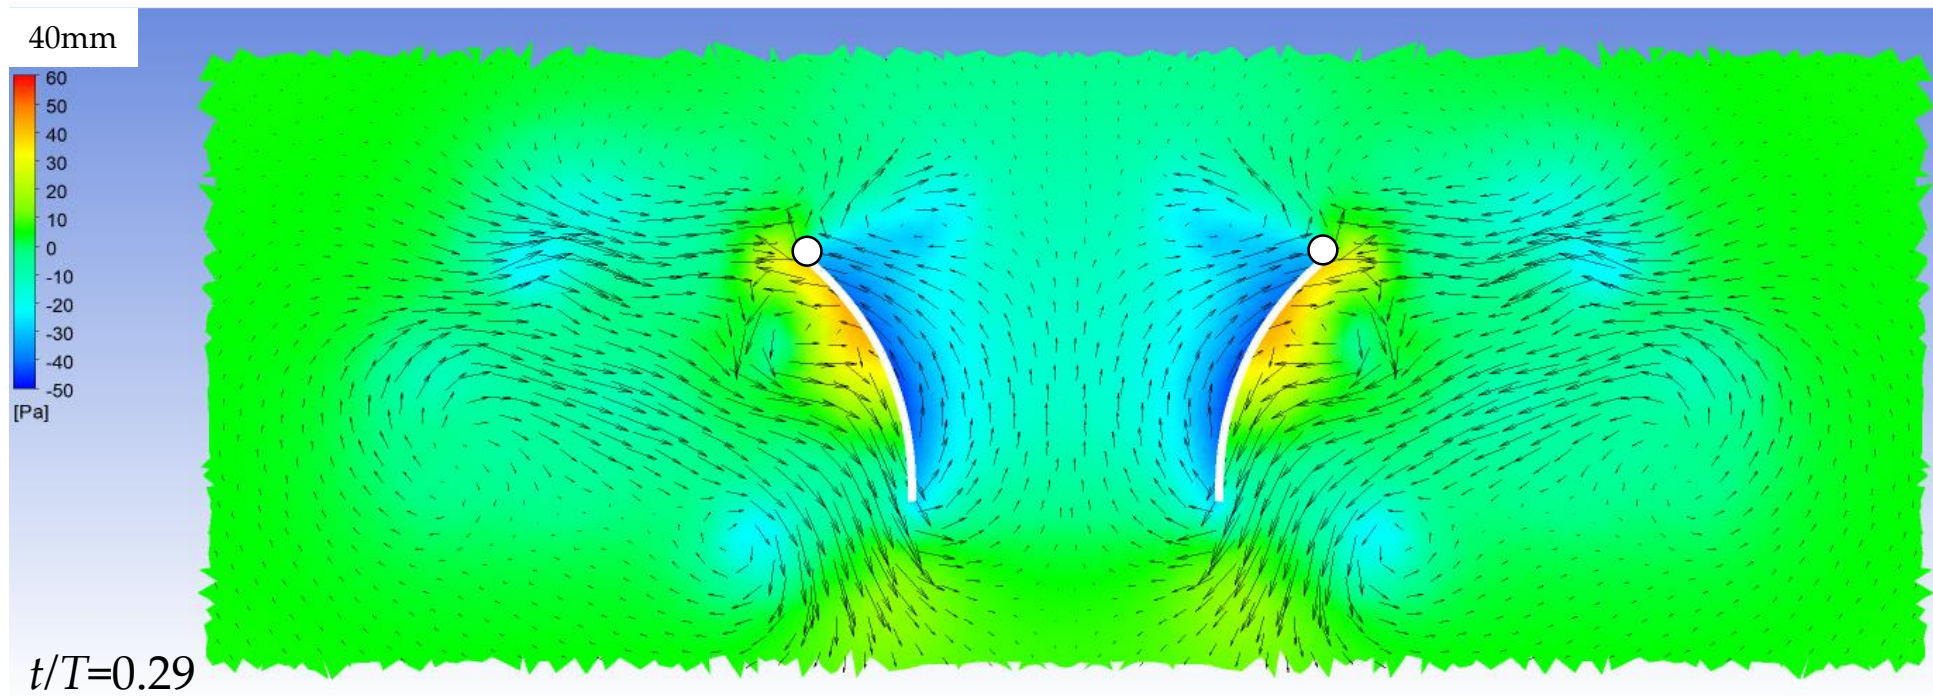



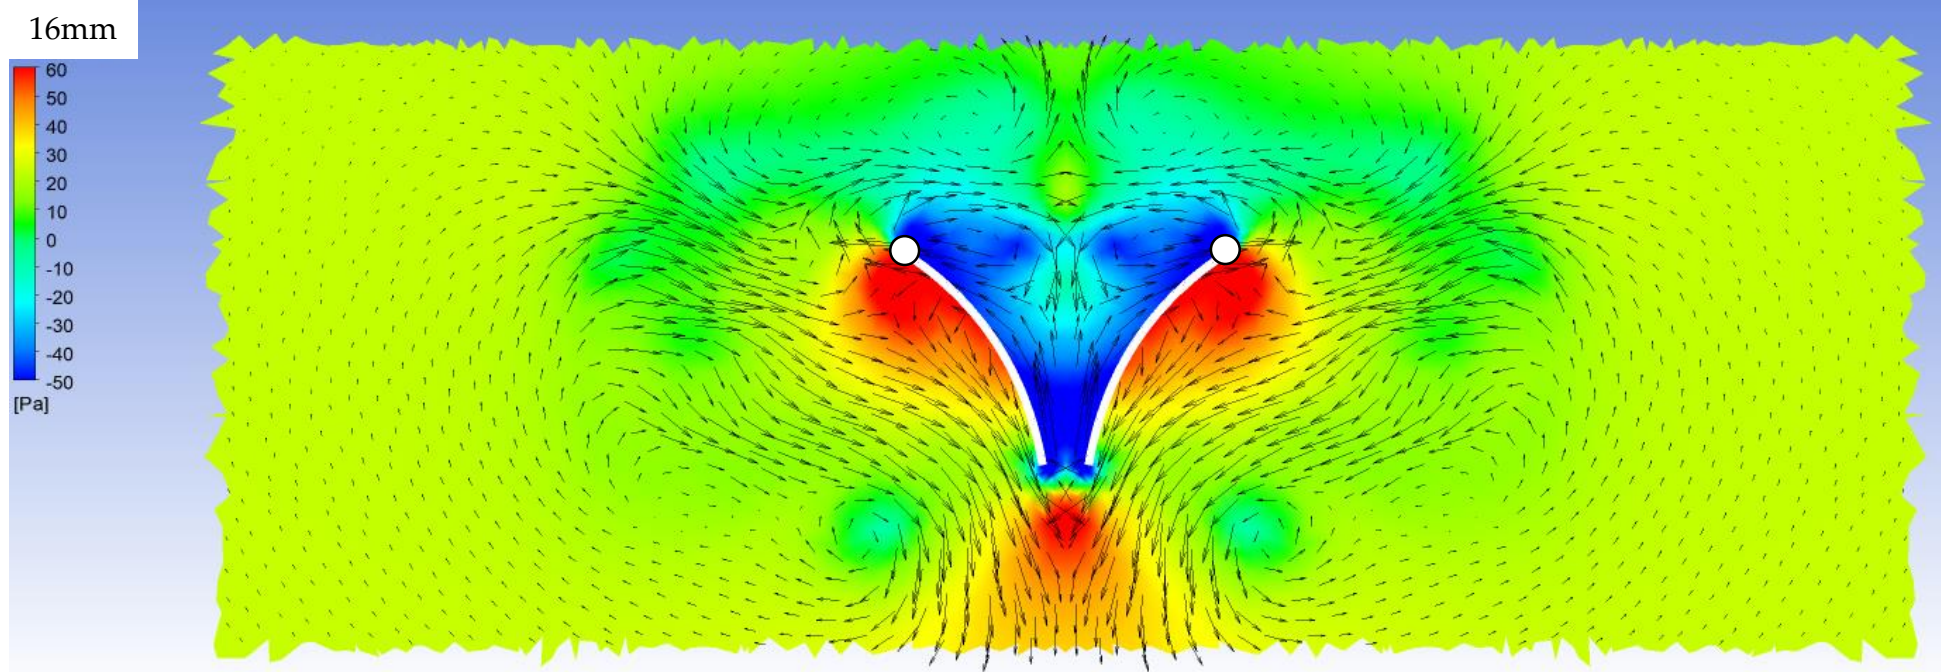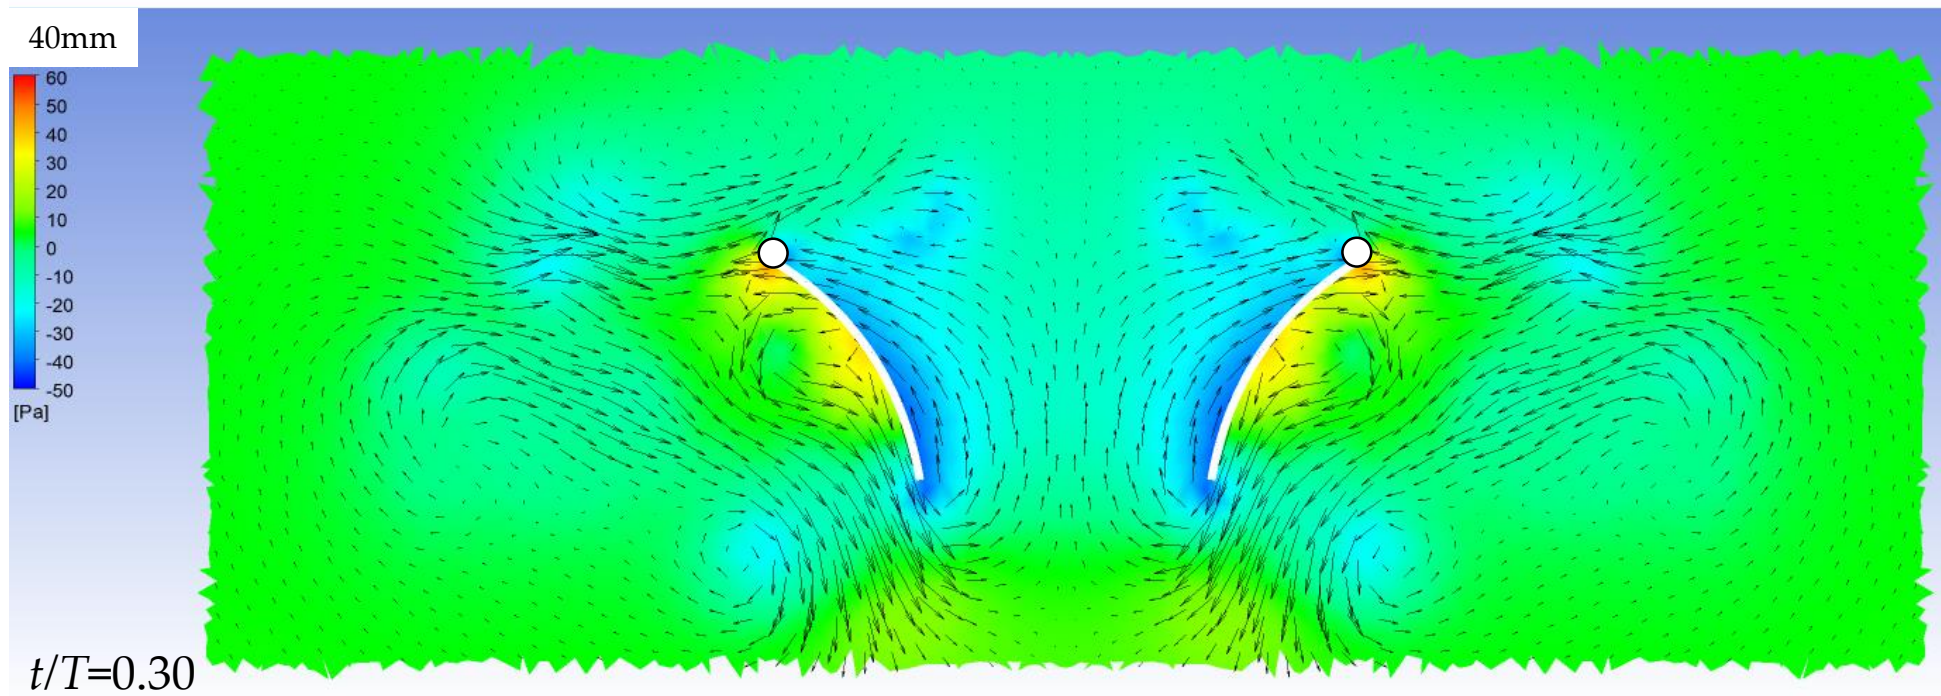



16mm

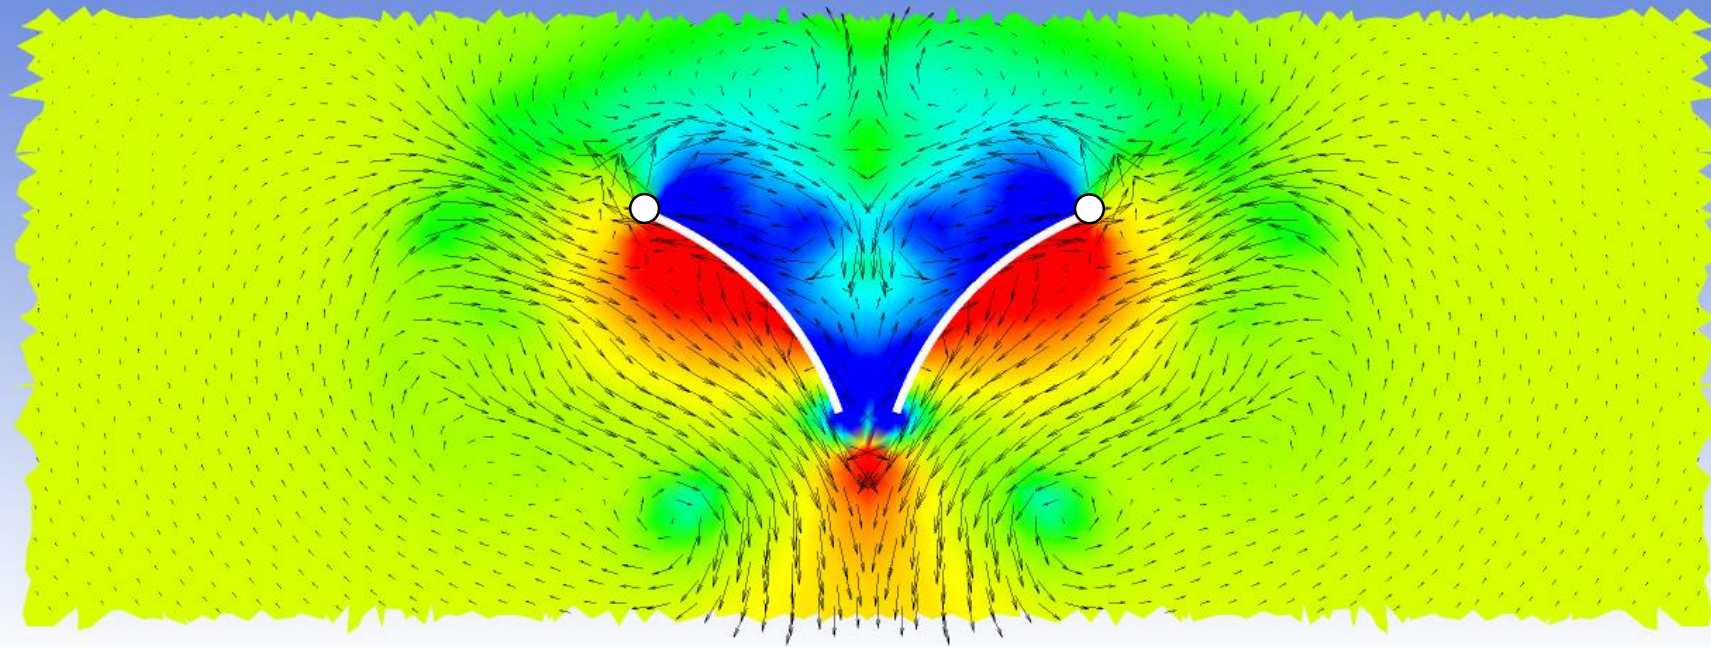

40mm

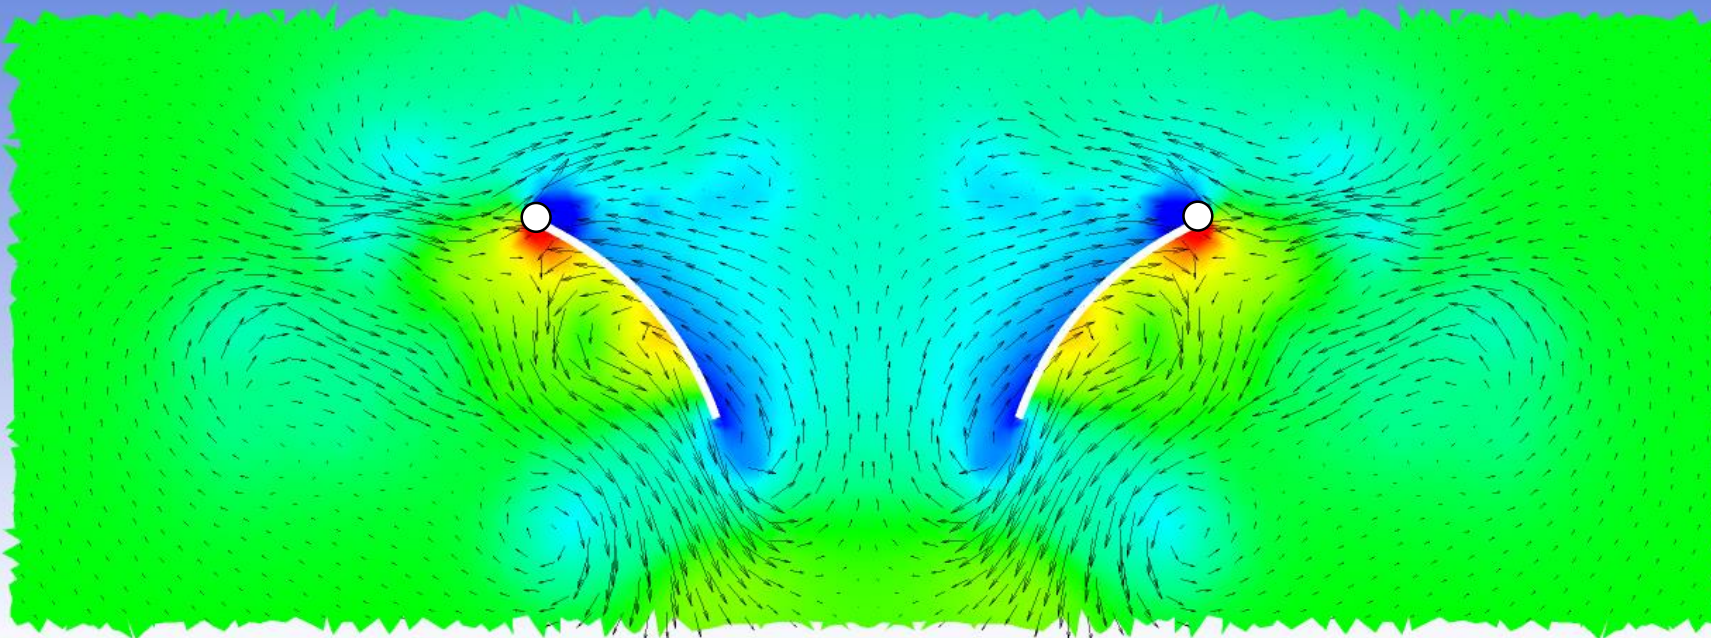

$t/T=0.31$



16mm

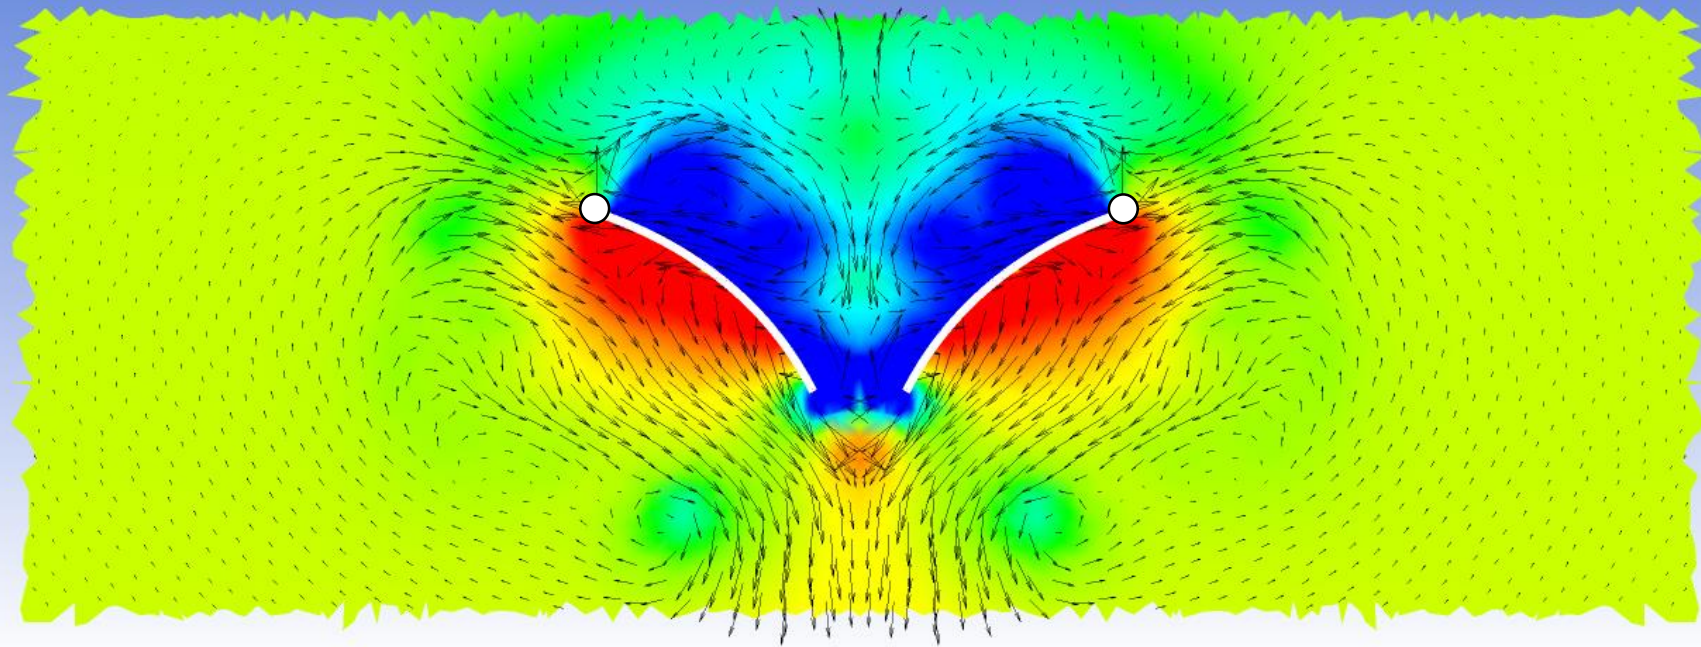

40mm

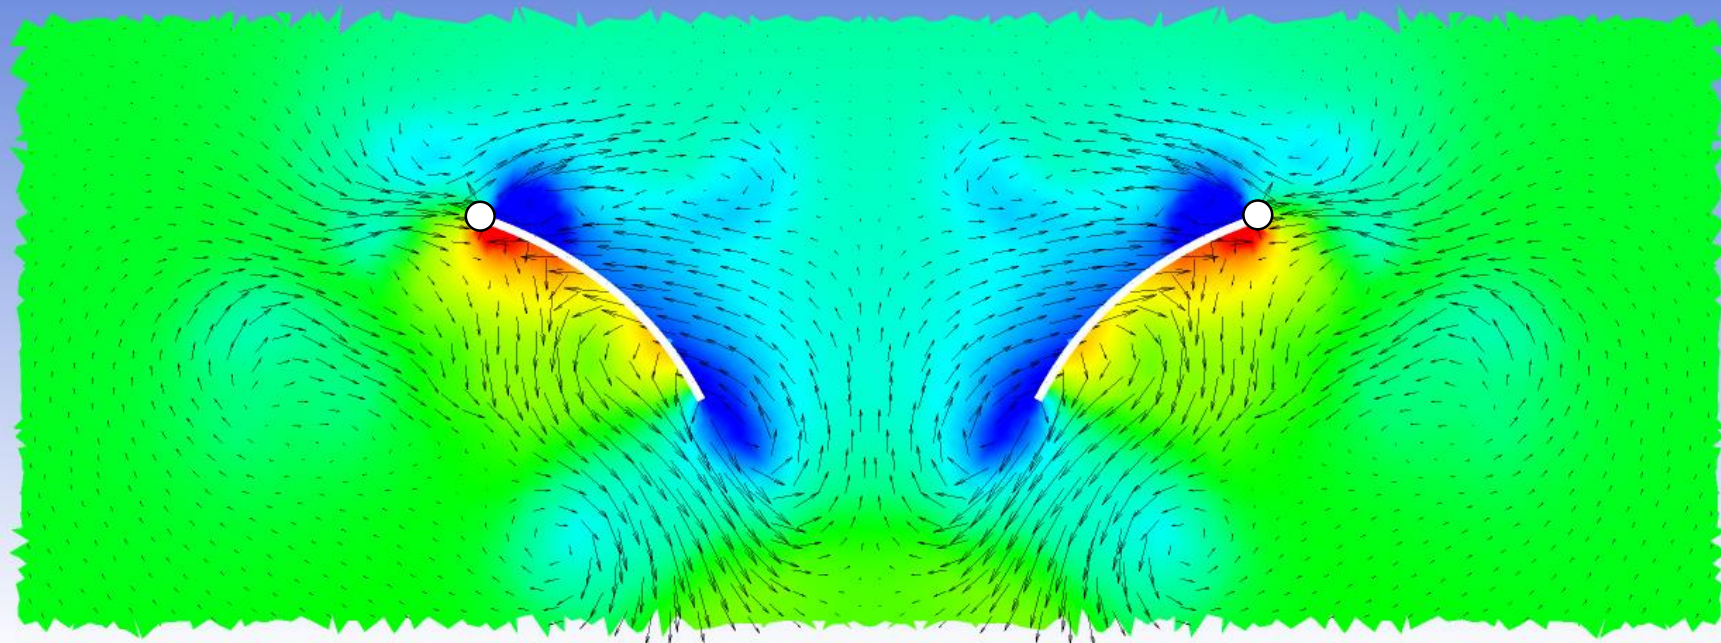

$t/T=0.32$
