# Supplementary material for: Clap-and-Fling Mechanism in Non-Zero Inflow of a Tailless Two-Winged Flapping-Wing Micro Air Vehicle
Source: MDPI journal article supplement (doi:10.3390/aerospace9020108), 2022-02-16
Supplement: s1 [file s1]

Archive with 4 entries (4 files):
- Supplement_S1_0p75R_J=0.pdf
- Supplement_S2_0p75R_J=0p5.pdf
- Supplement_S3_0p5c_downstroke reversal.pdf
- Supplement_S4_0p5c_upstroke reversal.pdf
